# Supplementary material for: Muscle fibrosis and maladaptation occur progressively in CKD and are rescued by dialysis
Source: PubMed Central journal article supplement (PMC8783691; doi:10.1172/jci.insight.150112), 2021-12-22
Supplement: jciinsight-6-150112-s078.pdf [file jciinsight-6-150112-s078.pdf]

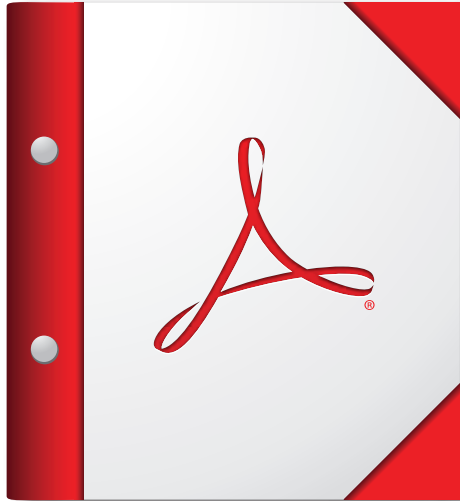

**For the best experience, open this PDF portfolio in  
Acrobat X or Adobe Reader X, or later.**

[Get Adobe Reader Now!](#)
