# Supplementary material for: Muscle fibrosis and maladaptation occur progressively in CKD and are rescued by dialysis
Source: JCI Insight. 2021 Dec 22;6(24):e150112. doi: 10.1172/jci.insight.150112 (PMC8783691; doi:10.1172/jci.insight.150112)
Supplement: Supplemental data [file jciinsight-6-150112-s076.pdf]

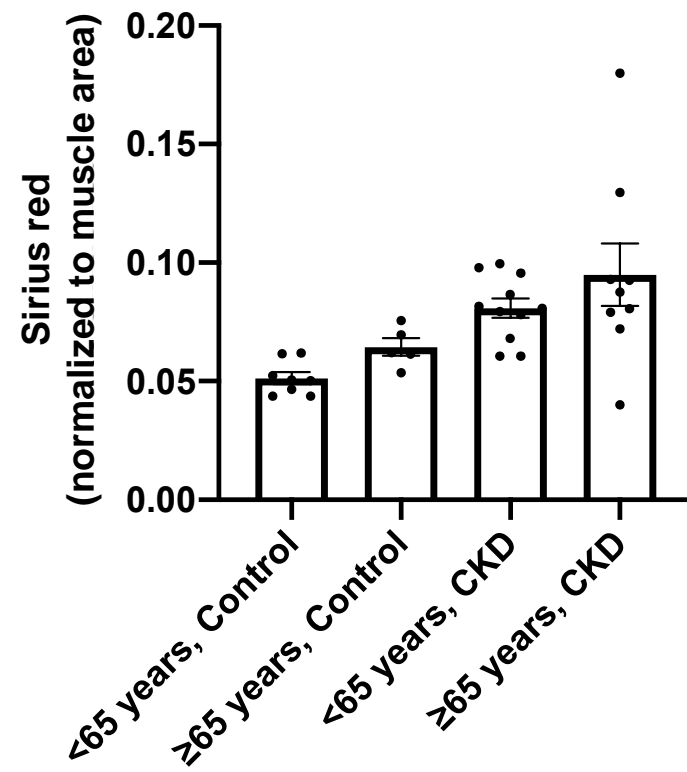

Supplementary Figure 1. Extracellular matrix collagen content is elevated in subjects with chronic kidney disease irrespective of age. n=33.

A.

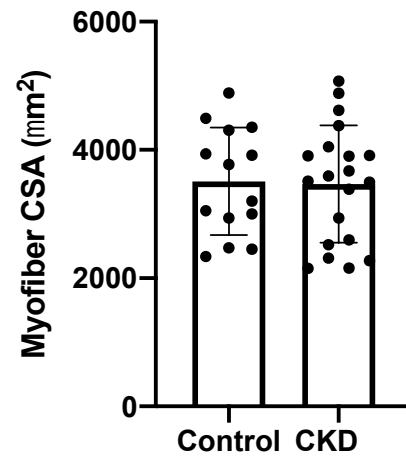

B.

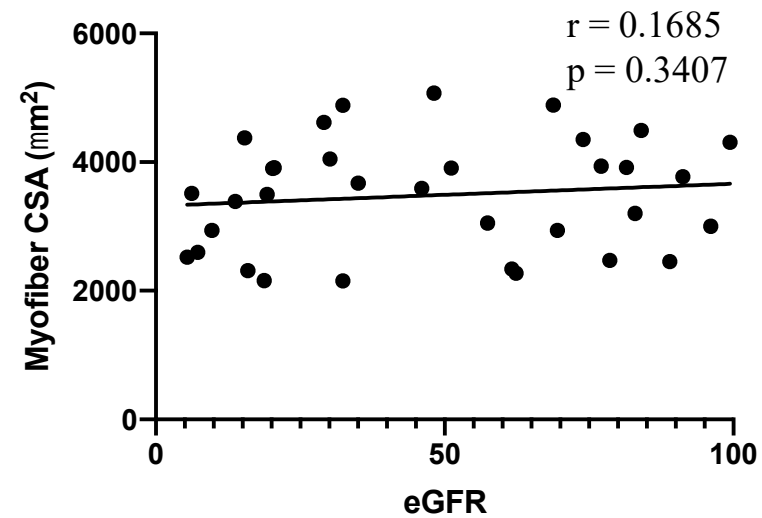

Supplementary Figure 2. Myofiber cross-sectional area (CSA) is not altered by chronic kidney disease. A. Myofiber CSA is not different in patients with CKD compared to healthy age-matched controls. B. Myofiber CSA is not associated with eGFR.  $n=33$ .

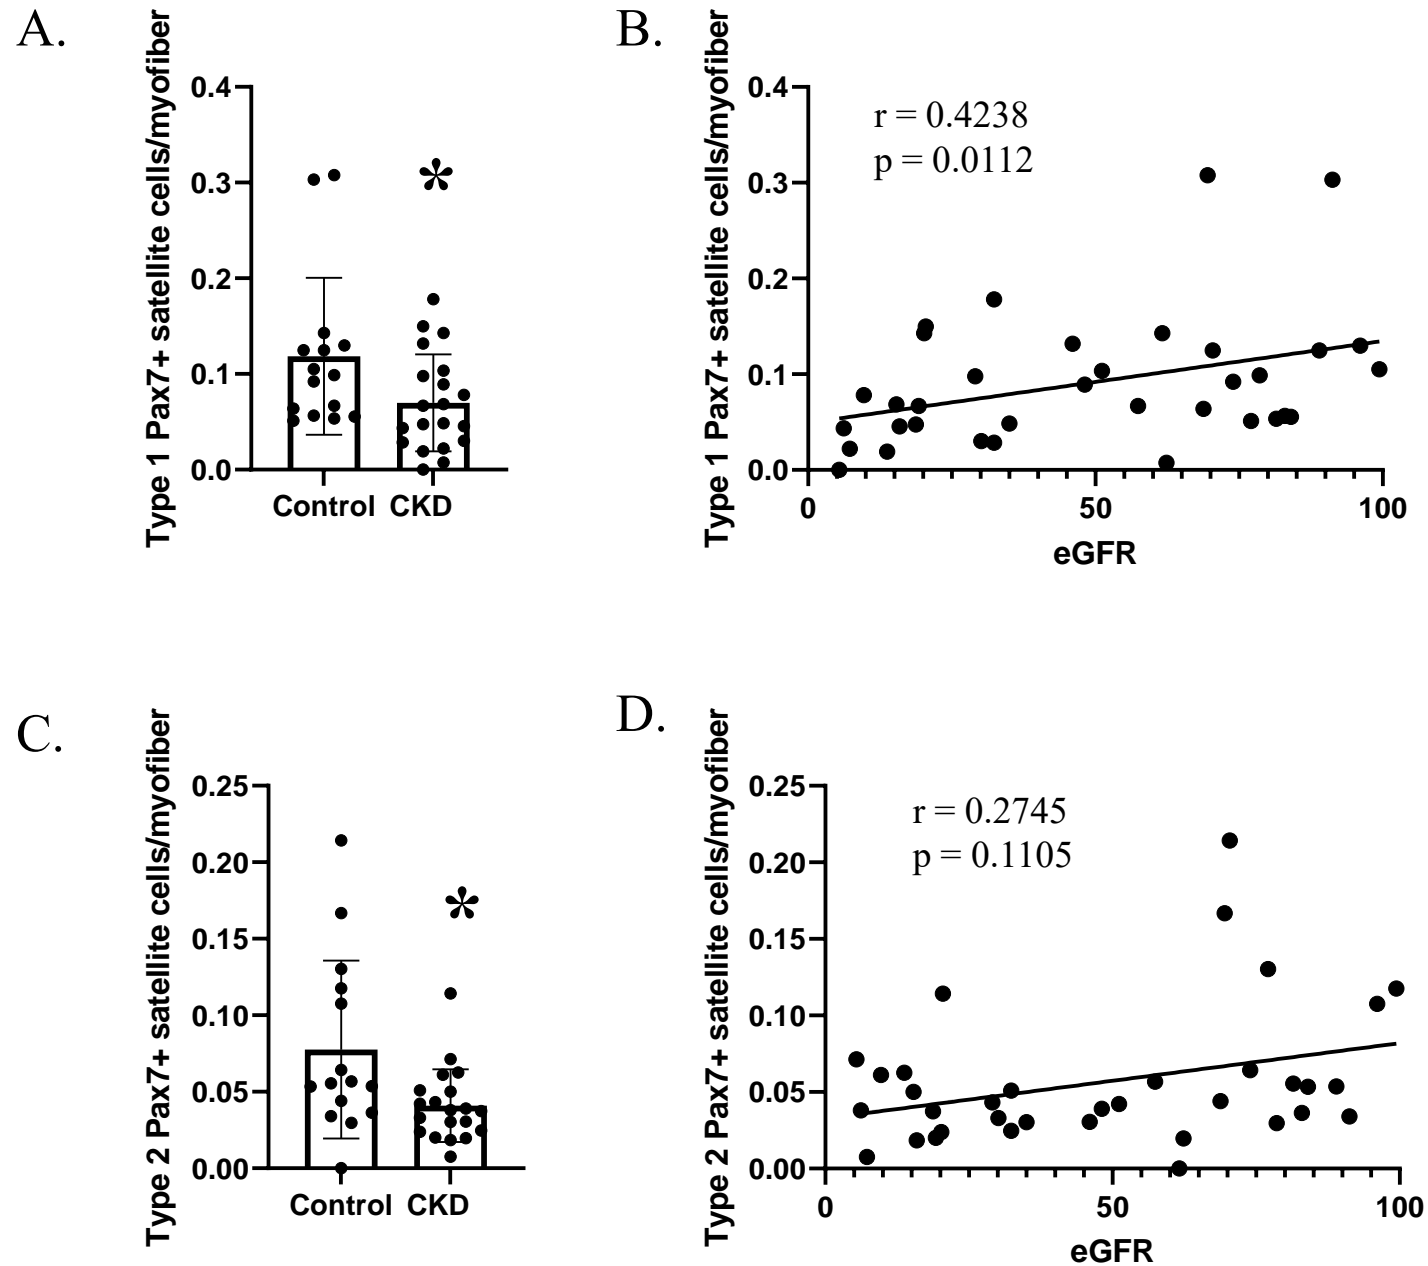

Supplementary Figure 3. Fiber type-specific satellite cell abundance is numerically lower in patients with CKD. A. Type 1 satellite cell abundance is numerically lower in patients with CKD compared to controls. B. Correlation between eGFR and type 1 satellite cell abundance. C. Type 2 satellite cell abundance is numerically lower in patients with CKD compared to controls. D. Correlation between eGFR and type 2 satellite cell abundance. n=33. \*p<0.05 vs Control.

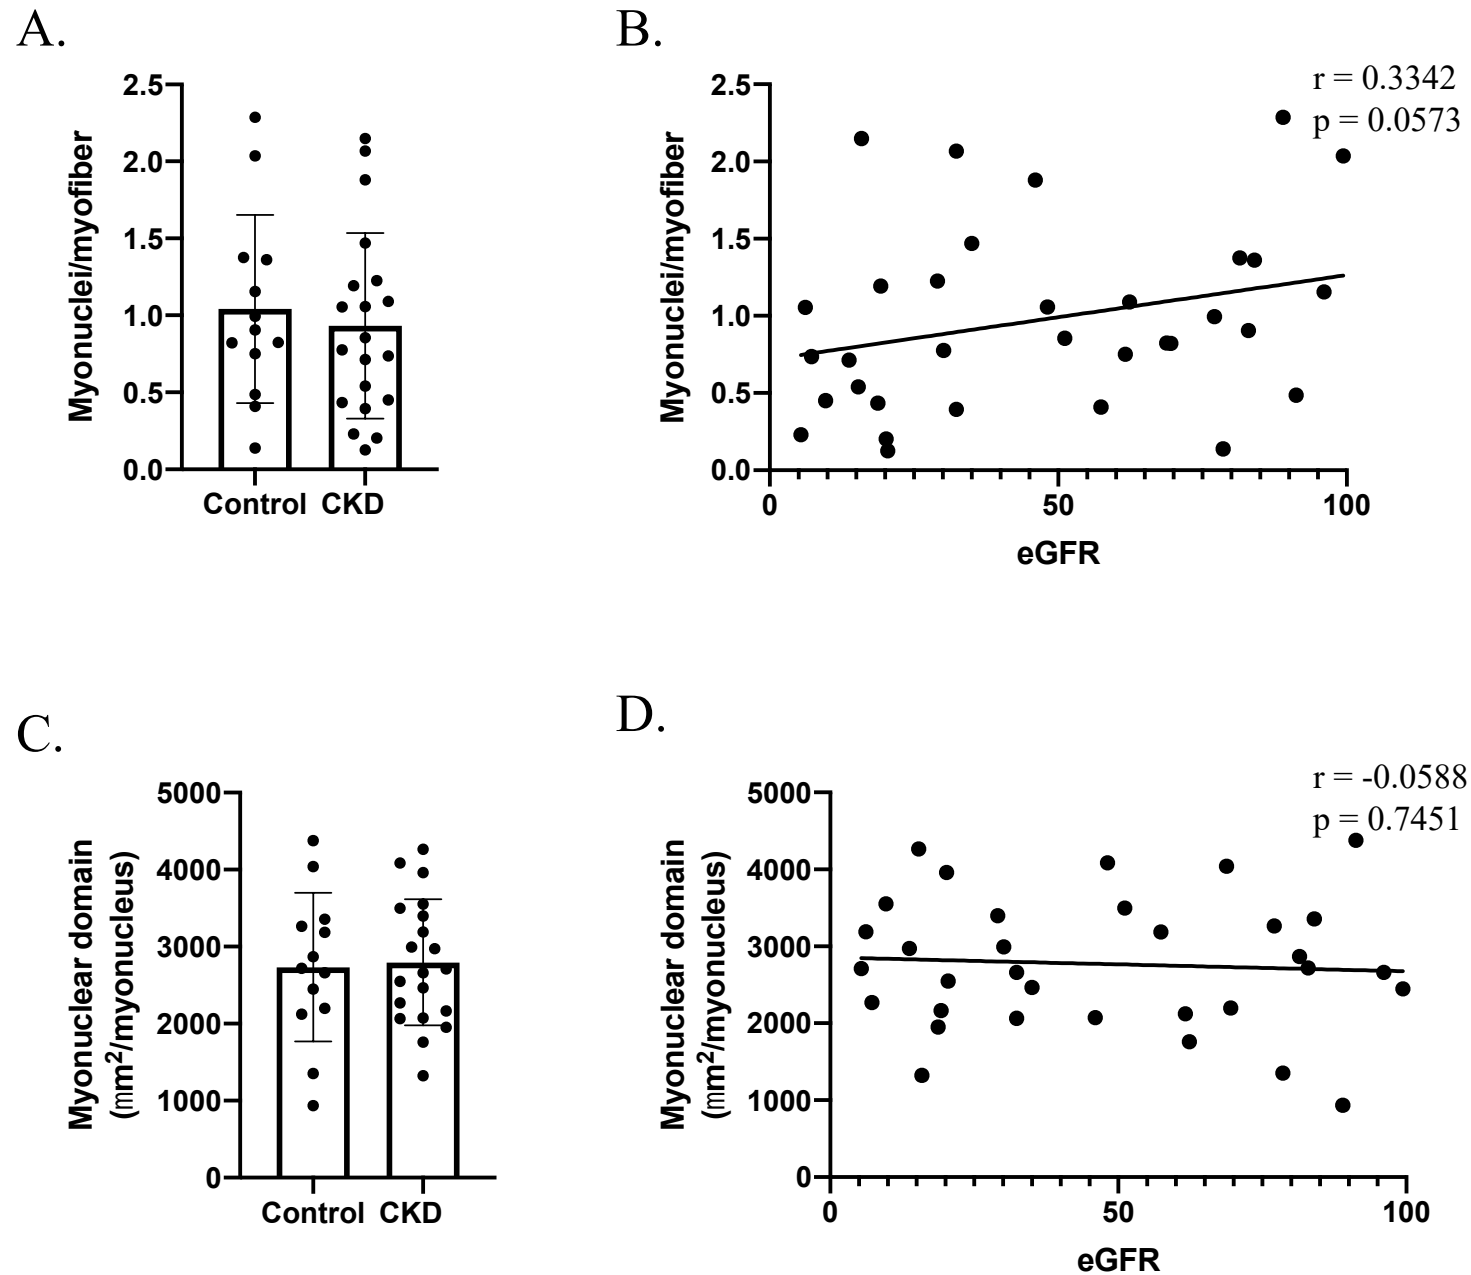

Supplementary Figure 4. Myonuclear density and myonuclear domain are not altered by CKD. A. Myonuclear density is not different in patients with CKD compared to controls. B. Correlation between myonuclear density and eGFR. C. Myonuclear domain is not different in patients with CKD compared to controls. D. Correlation between myonuclear domain and eGFR. n=33.

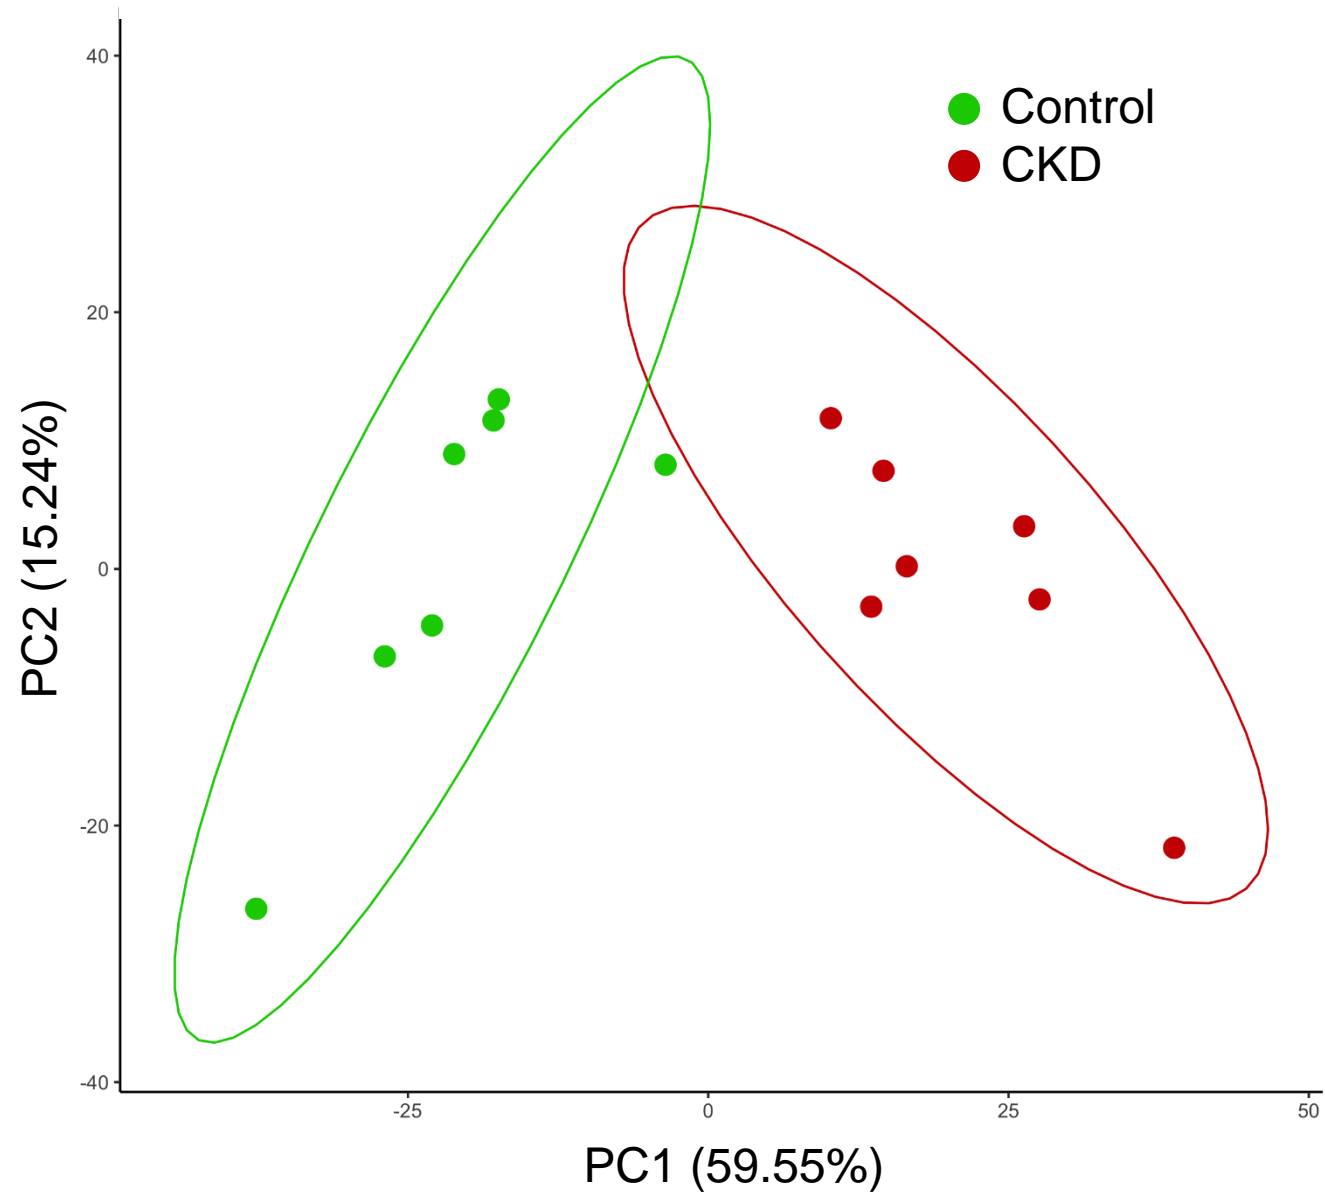

Supplementary Figure 5. Principal component analysis of skeletal muscle transcriptome of CKD patients compared to healthy individuals. n=7 Control; 7 CKD.

A.

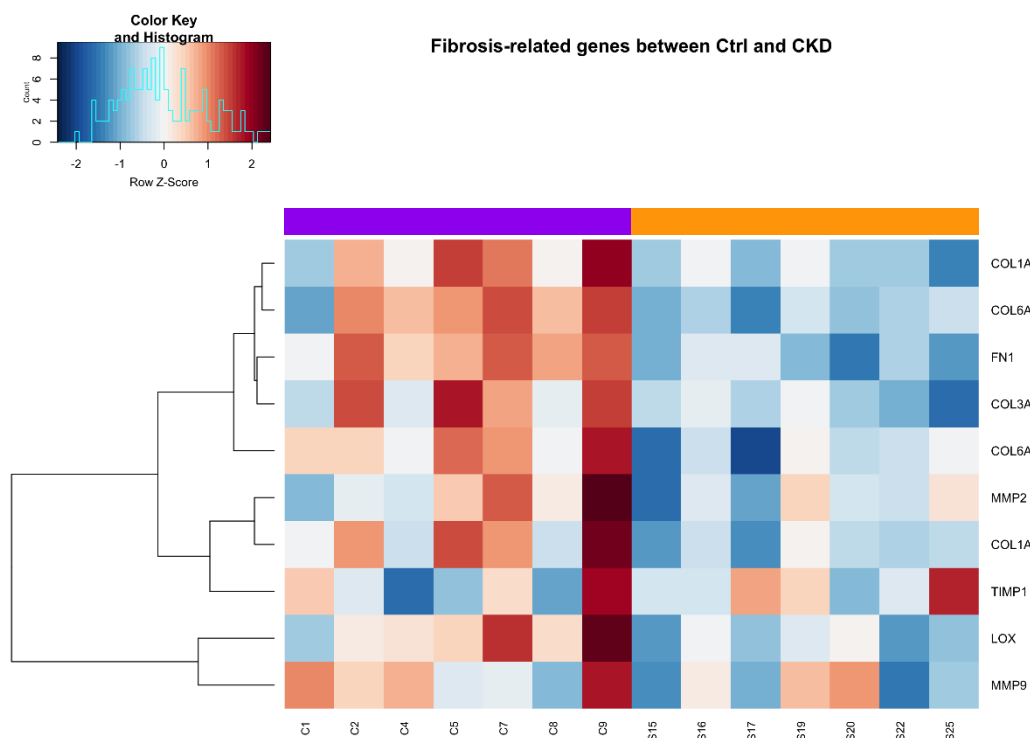

B.

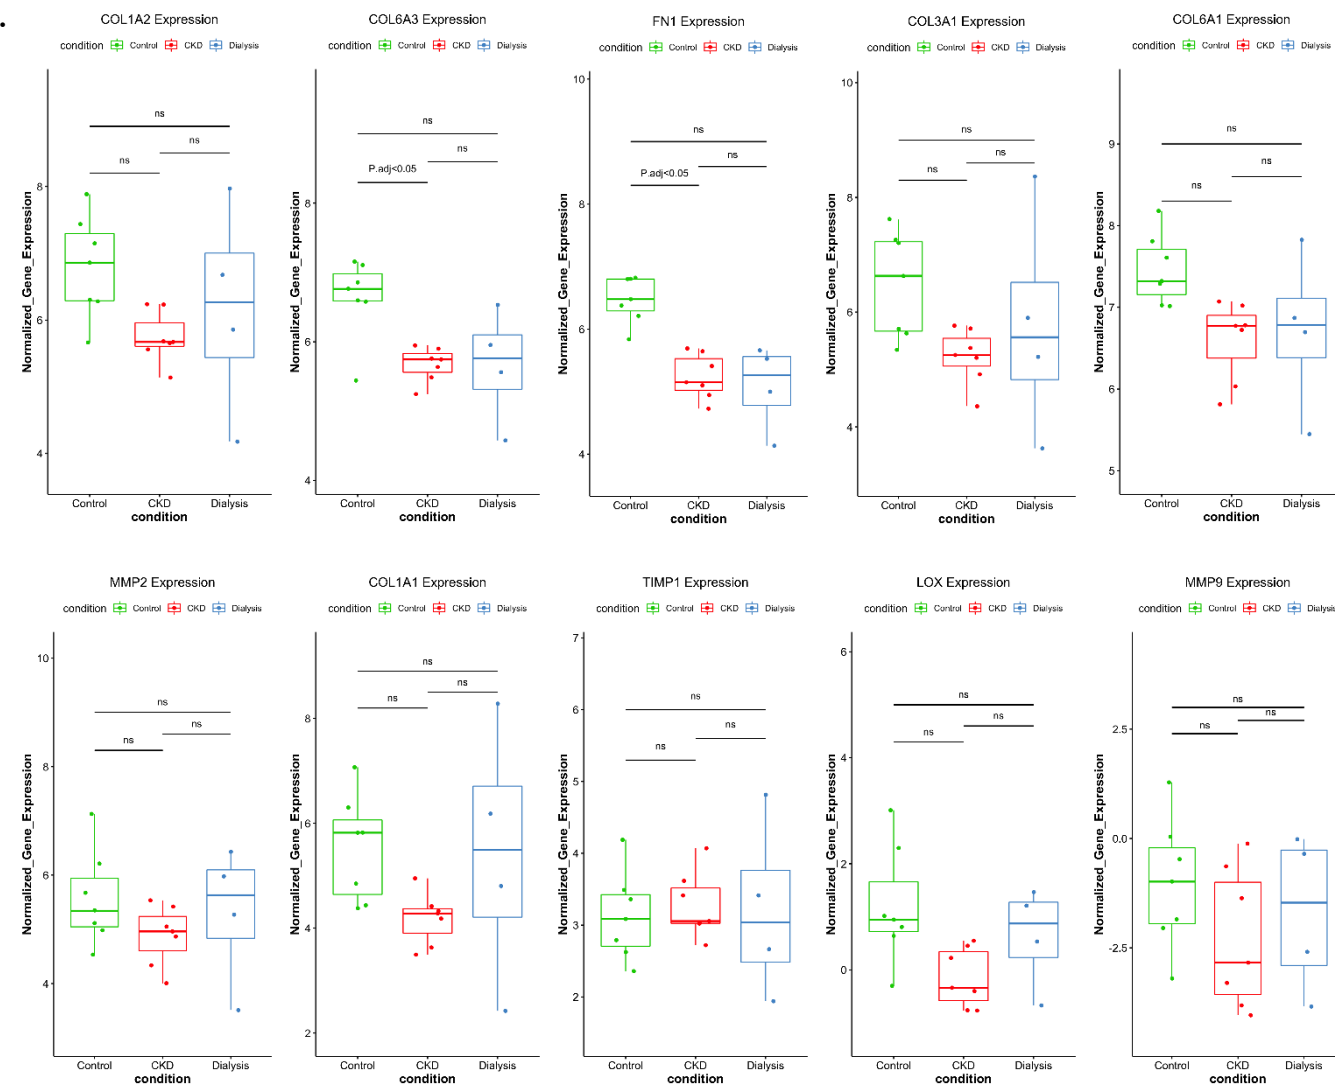

Supplementary Figure 6. Select fibrosis-related genes between control and CKD subjects. A. Heatmap indicating expression of select fibrosis-related genes. B. Box plots showing expression of select fibrosis-related genes. Orange bar=CKD, purple bar=Control. n=7 Control, n=7 CKD, n=4 Dialysis.

A.

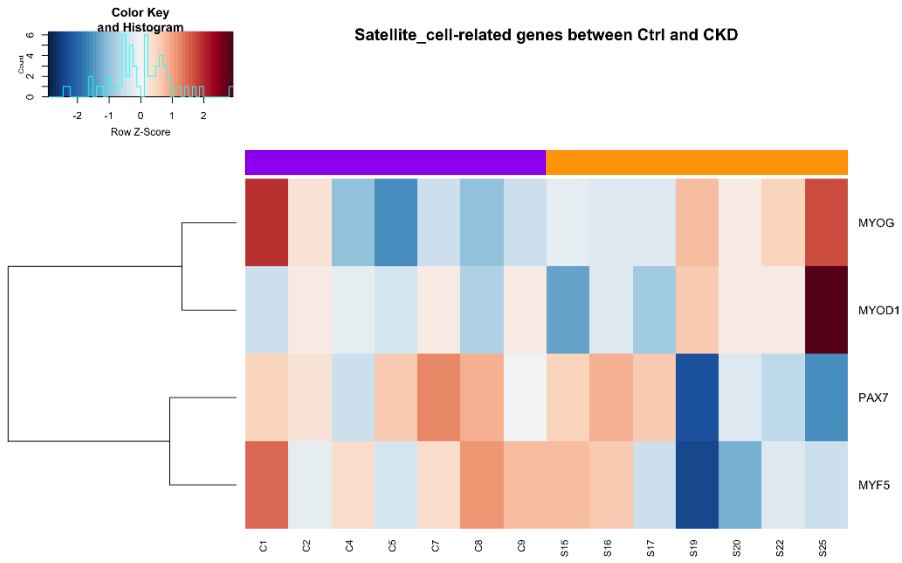

B.

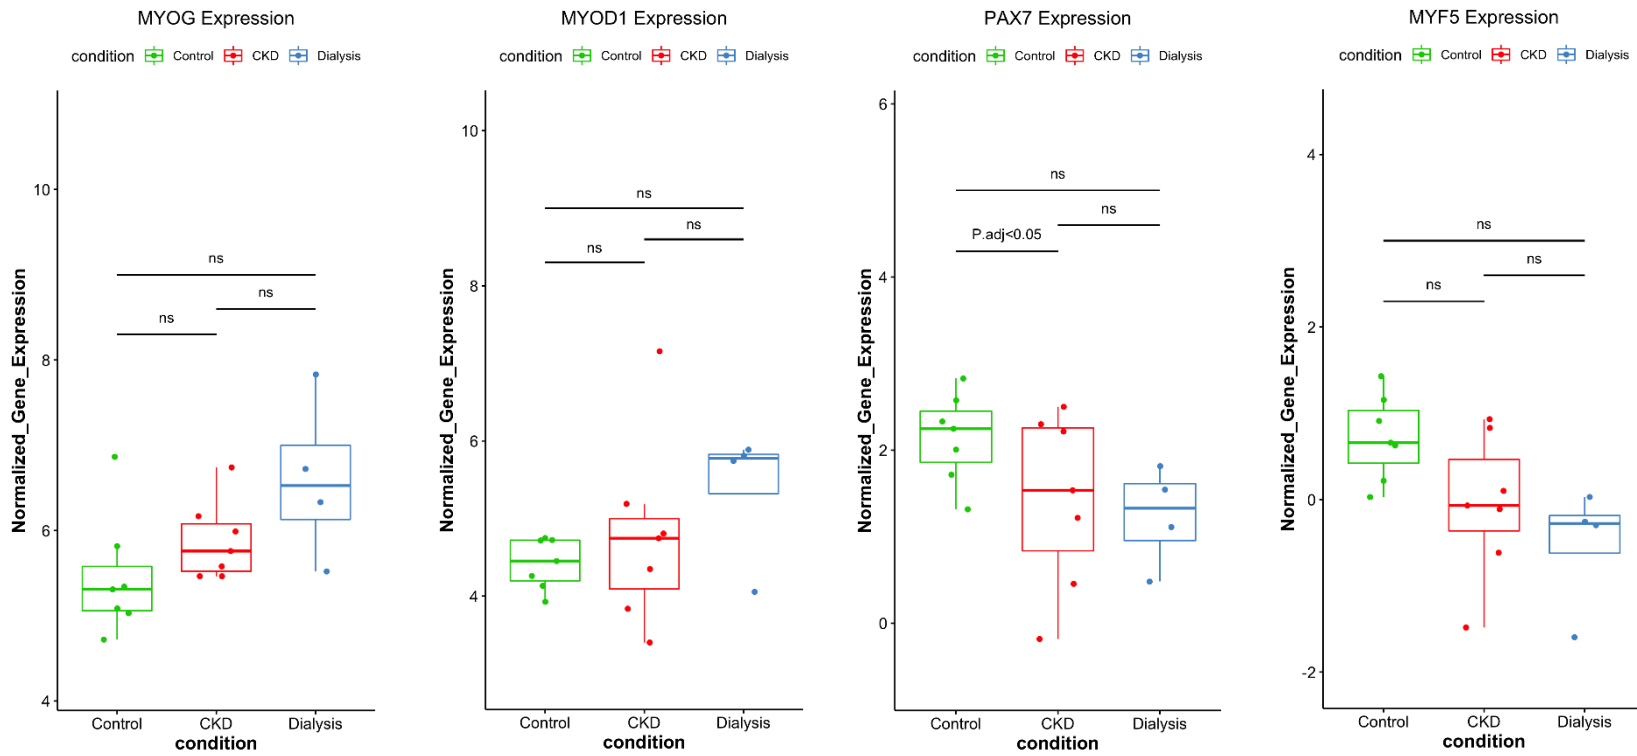

Supplementary Figure 7. CKD negatively impacts PAX7 transcription with no significant alteration in other satellite cell-related transcripts. A. Heatmap indicating expression of select satellite cell-related genes. B. PAX7 expression is lower in patients with CKD compared to controls, while other satellite cell-related transcripts are not significantly different. Orange bar=CKD, purple bar=Control. n=7 Control, n=7 CKD, n=4 Dialysis.



A.

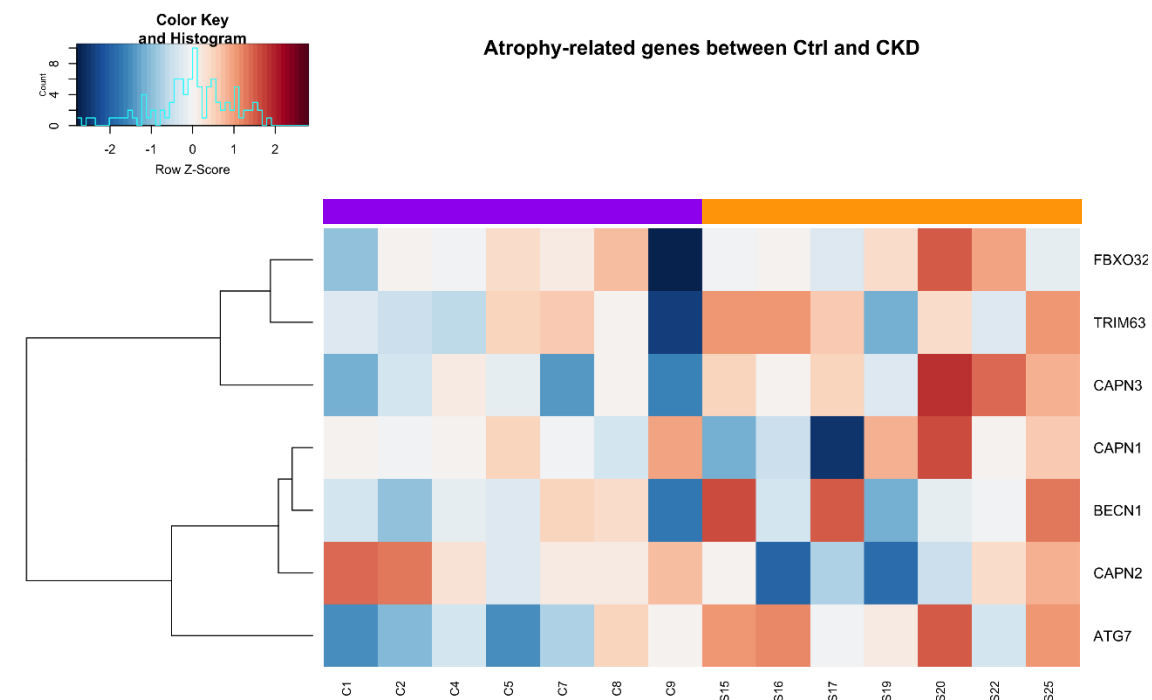

B.

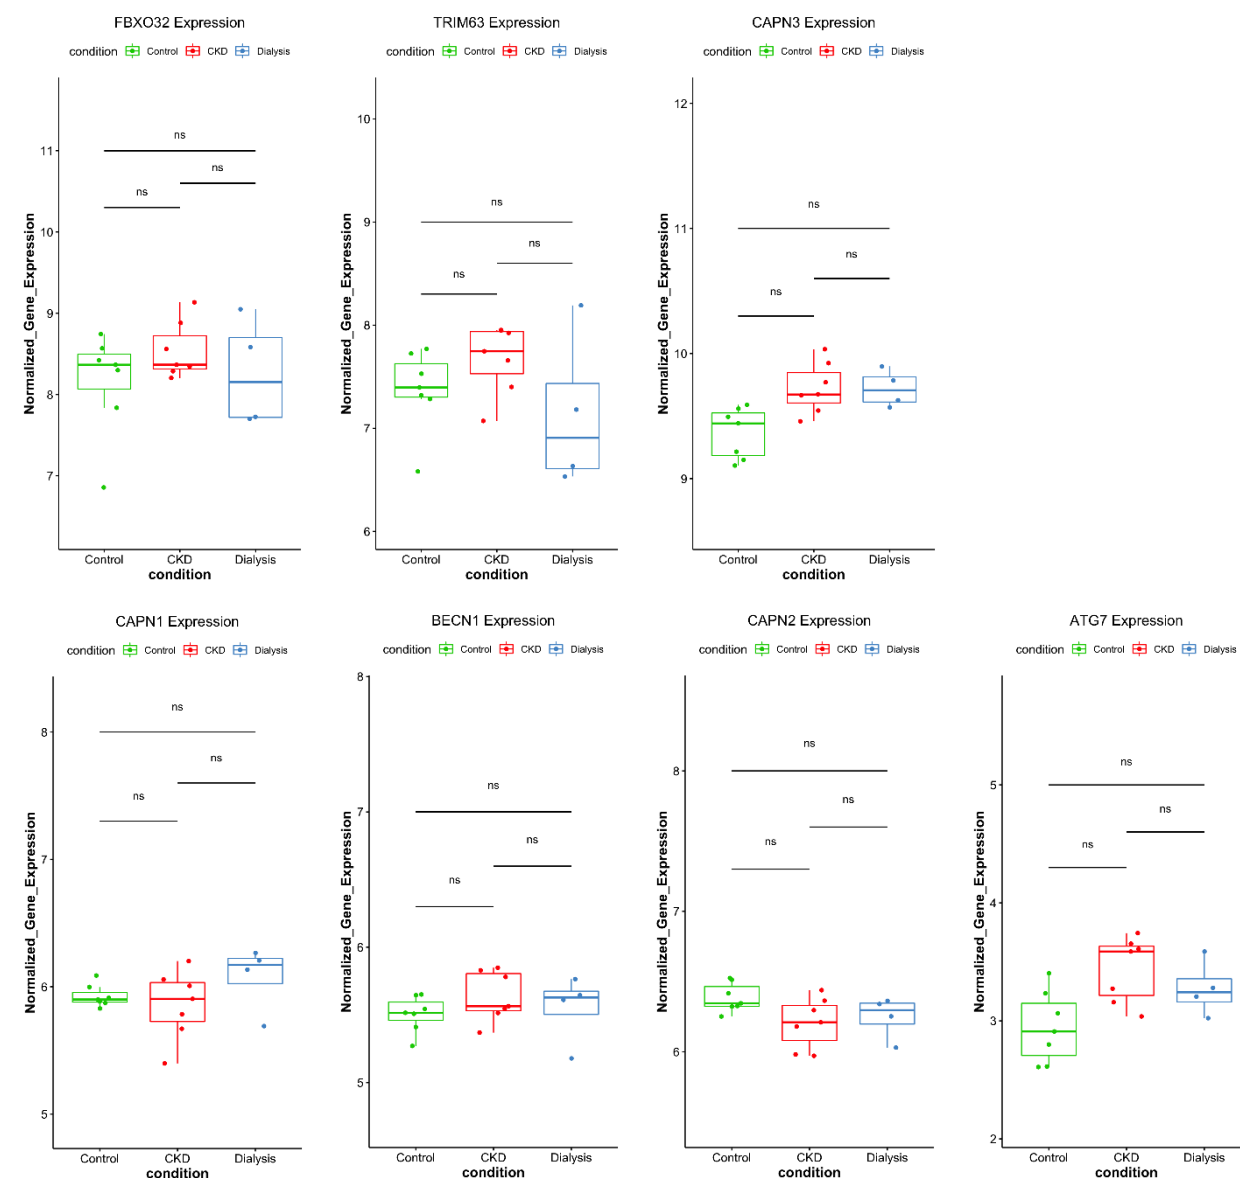

Supplementary Figure 9. Select atrophy-related transcript levels between control and CKD subjects. A. Heatmap indicating expression of select atrophy-related genes. B. Expression is not significantly altered for individual atrophy-related genes. Orange bar=CKD, purple bar=Control. n=7 Control, n=7 CKD, n=4 Dialysis.

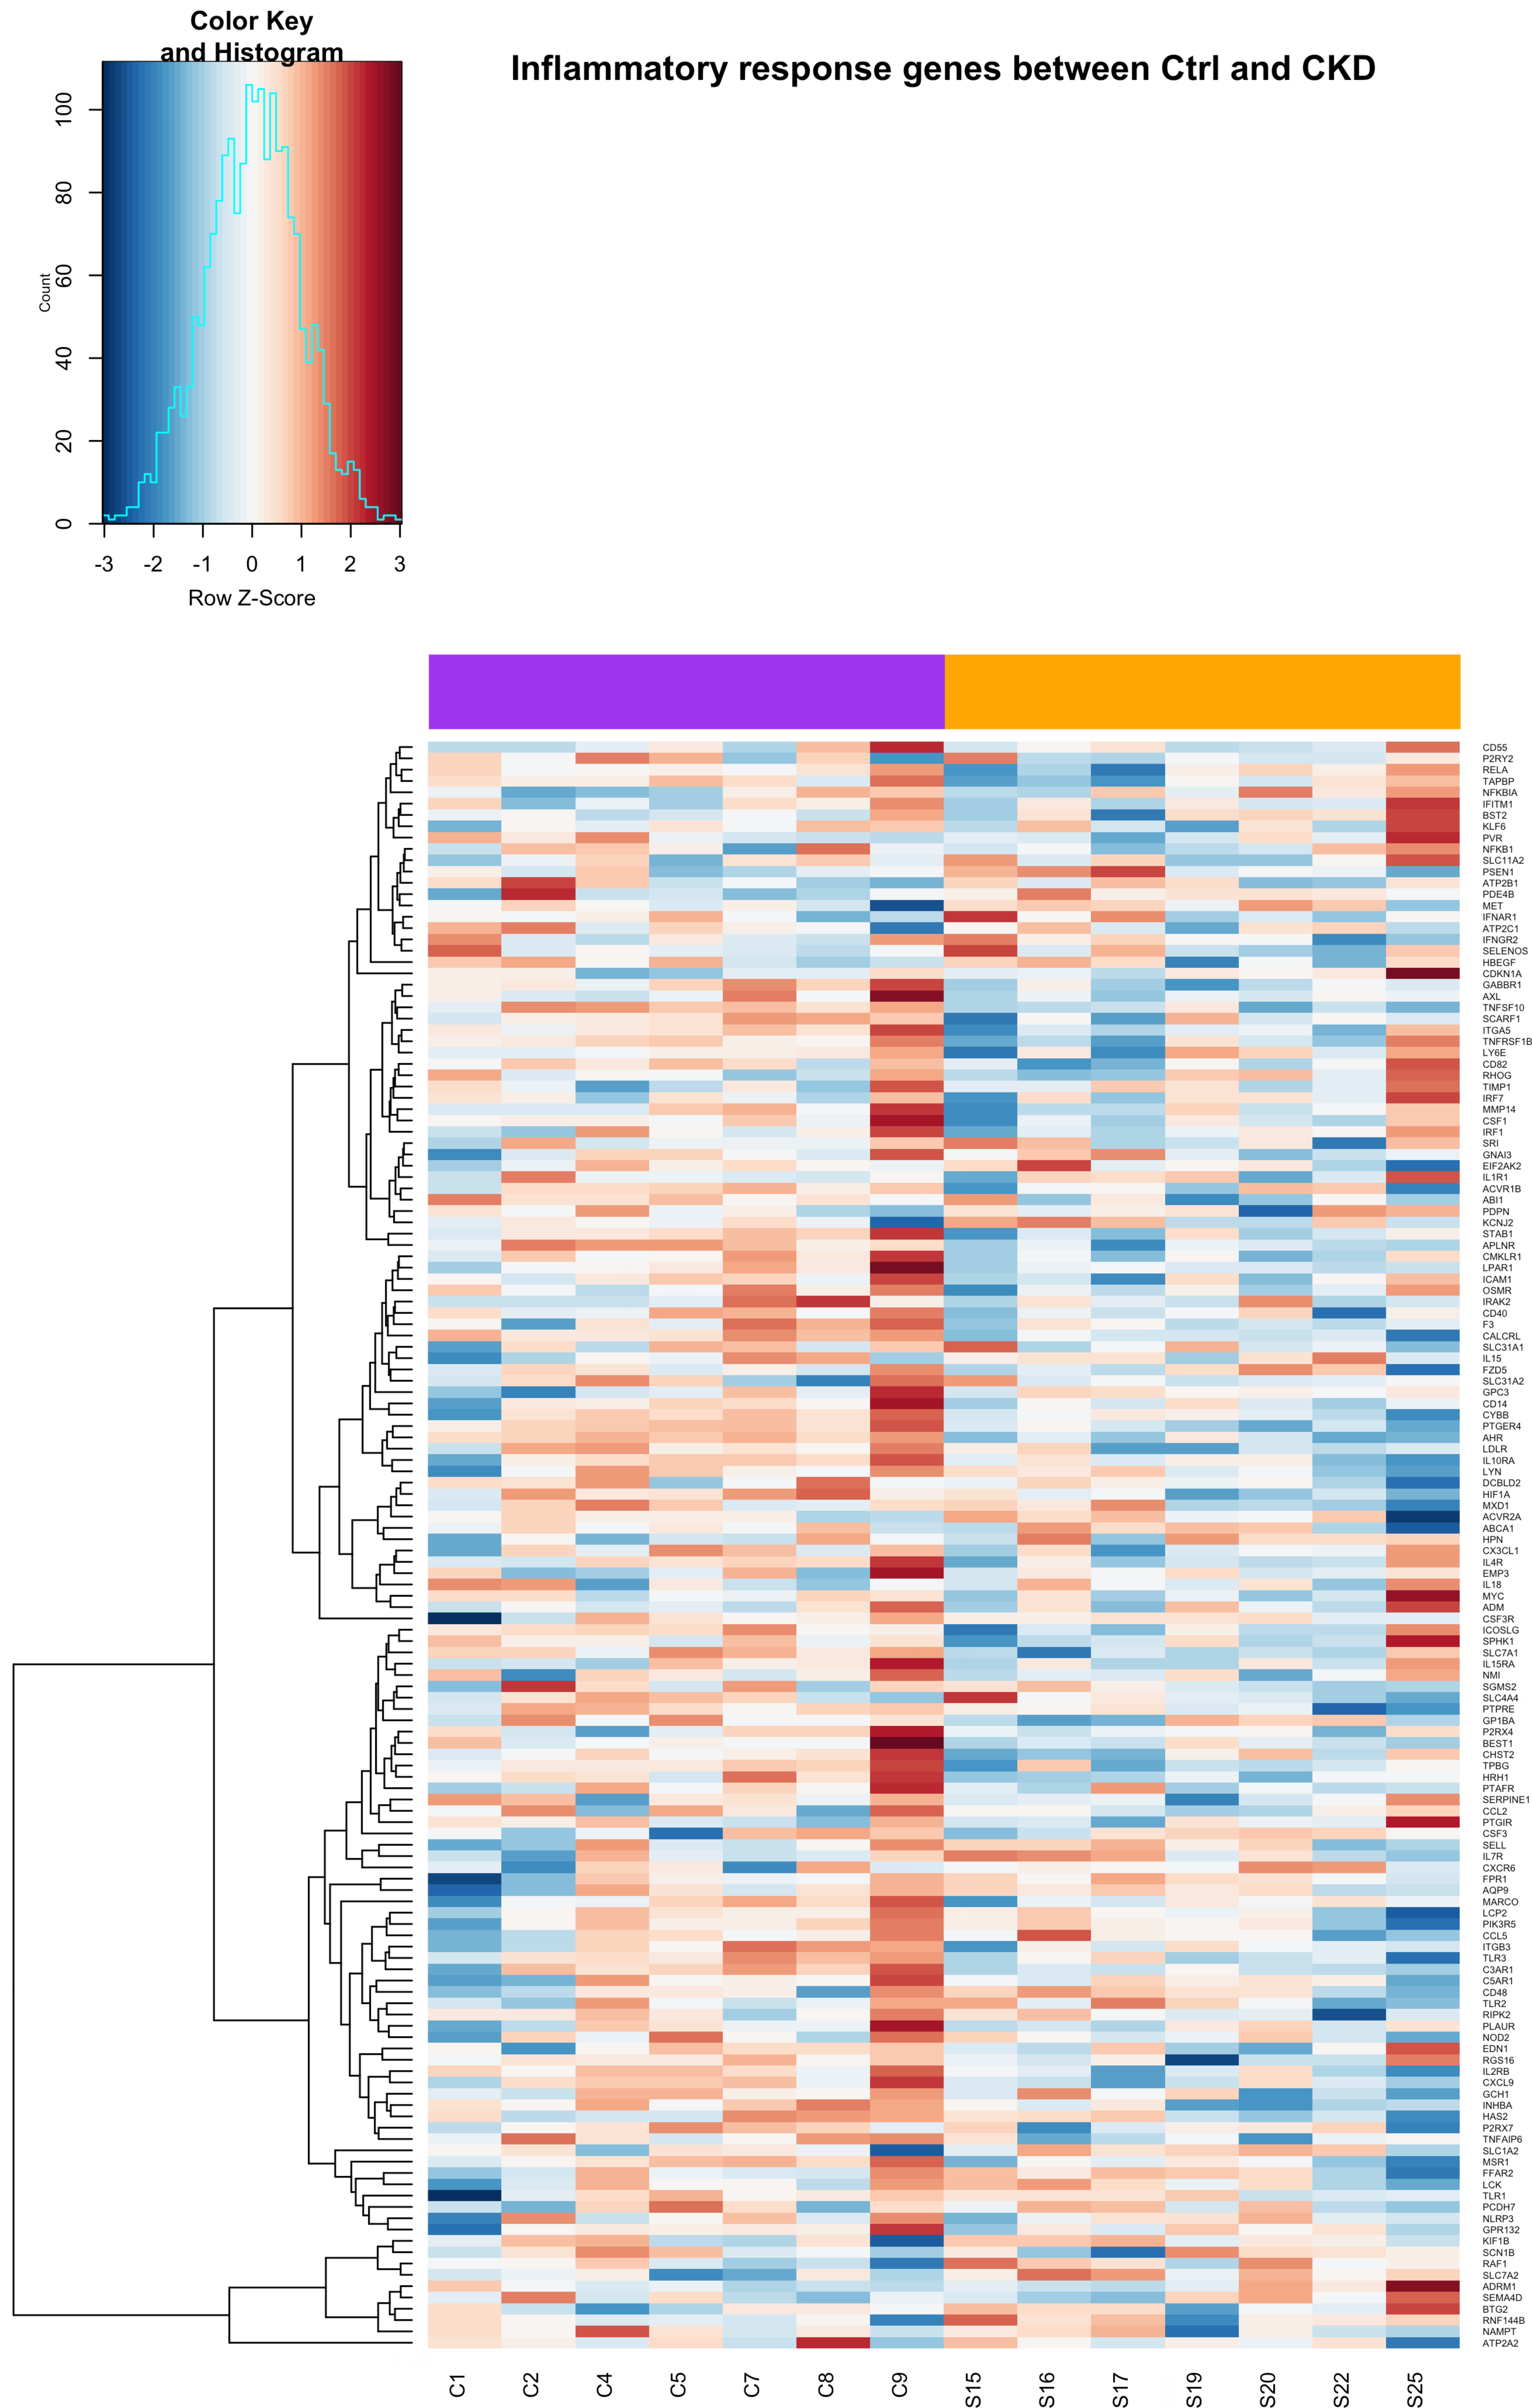

Supplementary Figure 10. Heatmap indicating expression of inflammation-related genes. Orange bar=CKD, purple bar=Control. n=7 Control, n=7 CKD.

DNA Repair genes between Ctrl and CKD

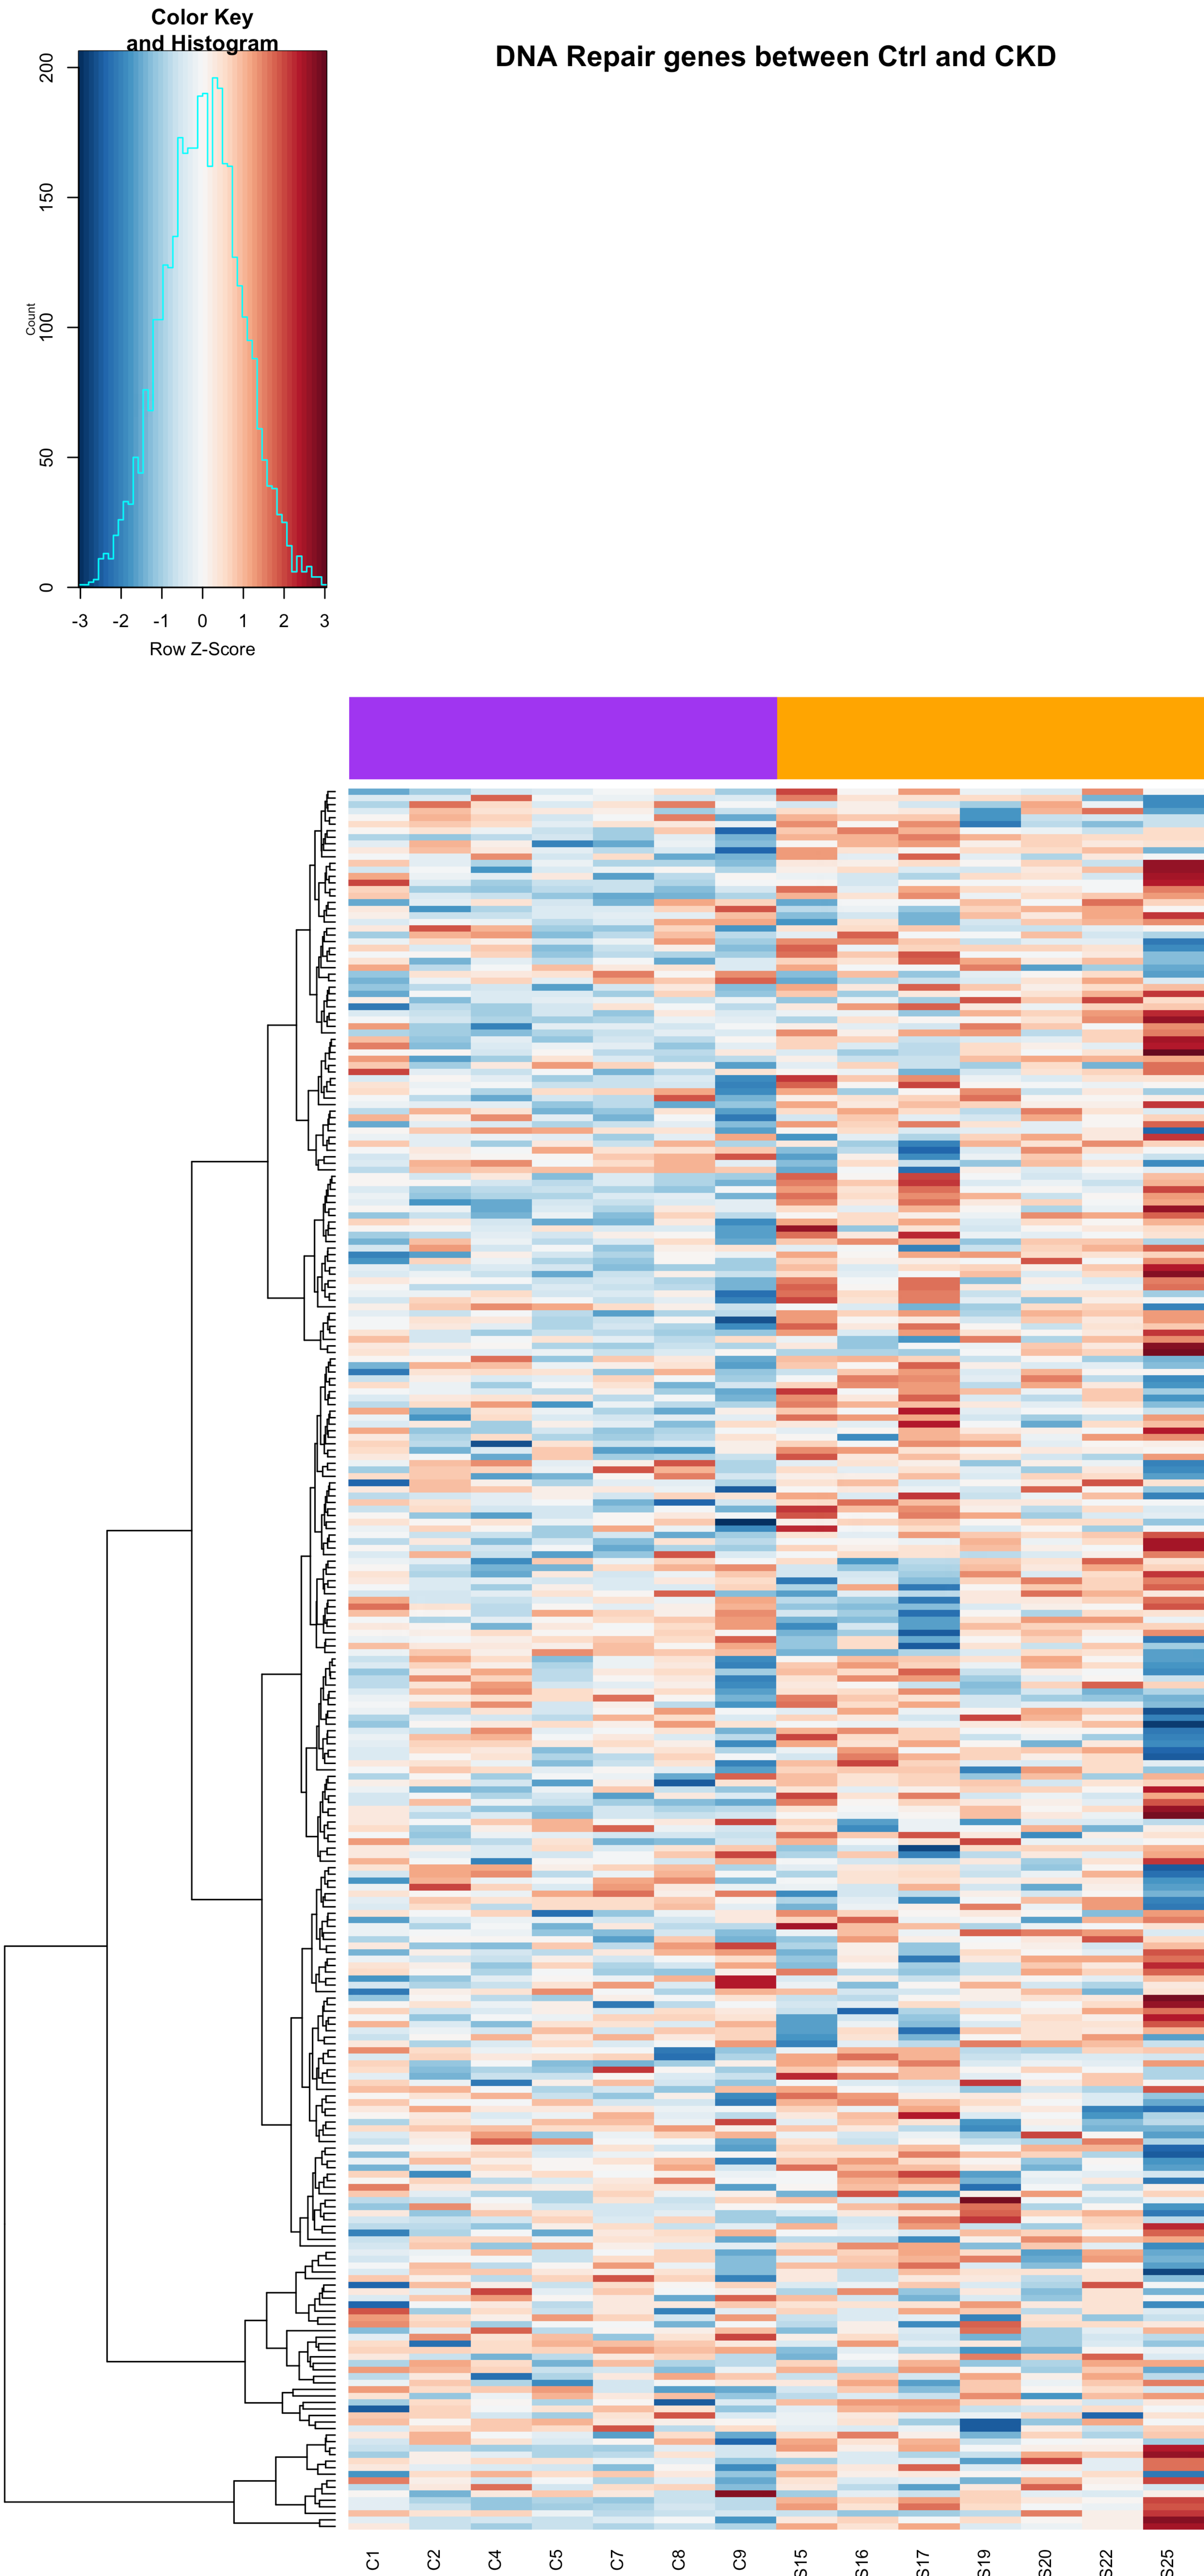

Supplementary Figure 11. Heatmap indicating expression of DNA repair-related genes. Orange bar=CKD, purple bar=Control. n=7 Control, n=7 CKD.

Oxidative Phosphorylation genes between Ctrl and CKD

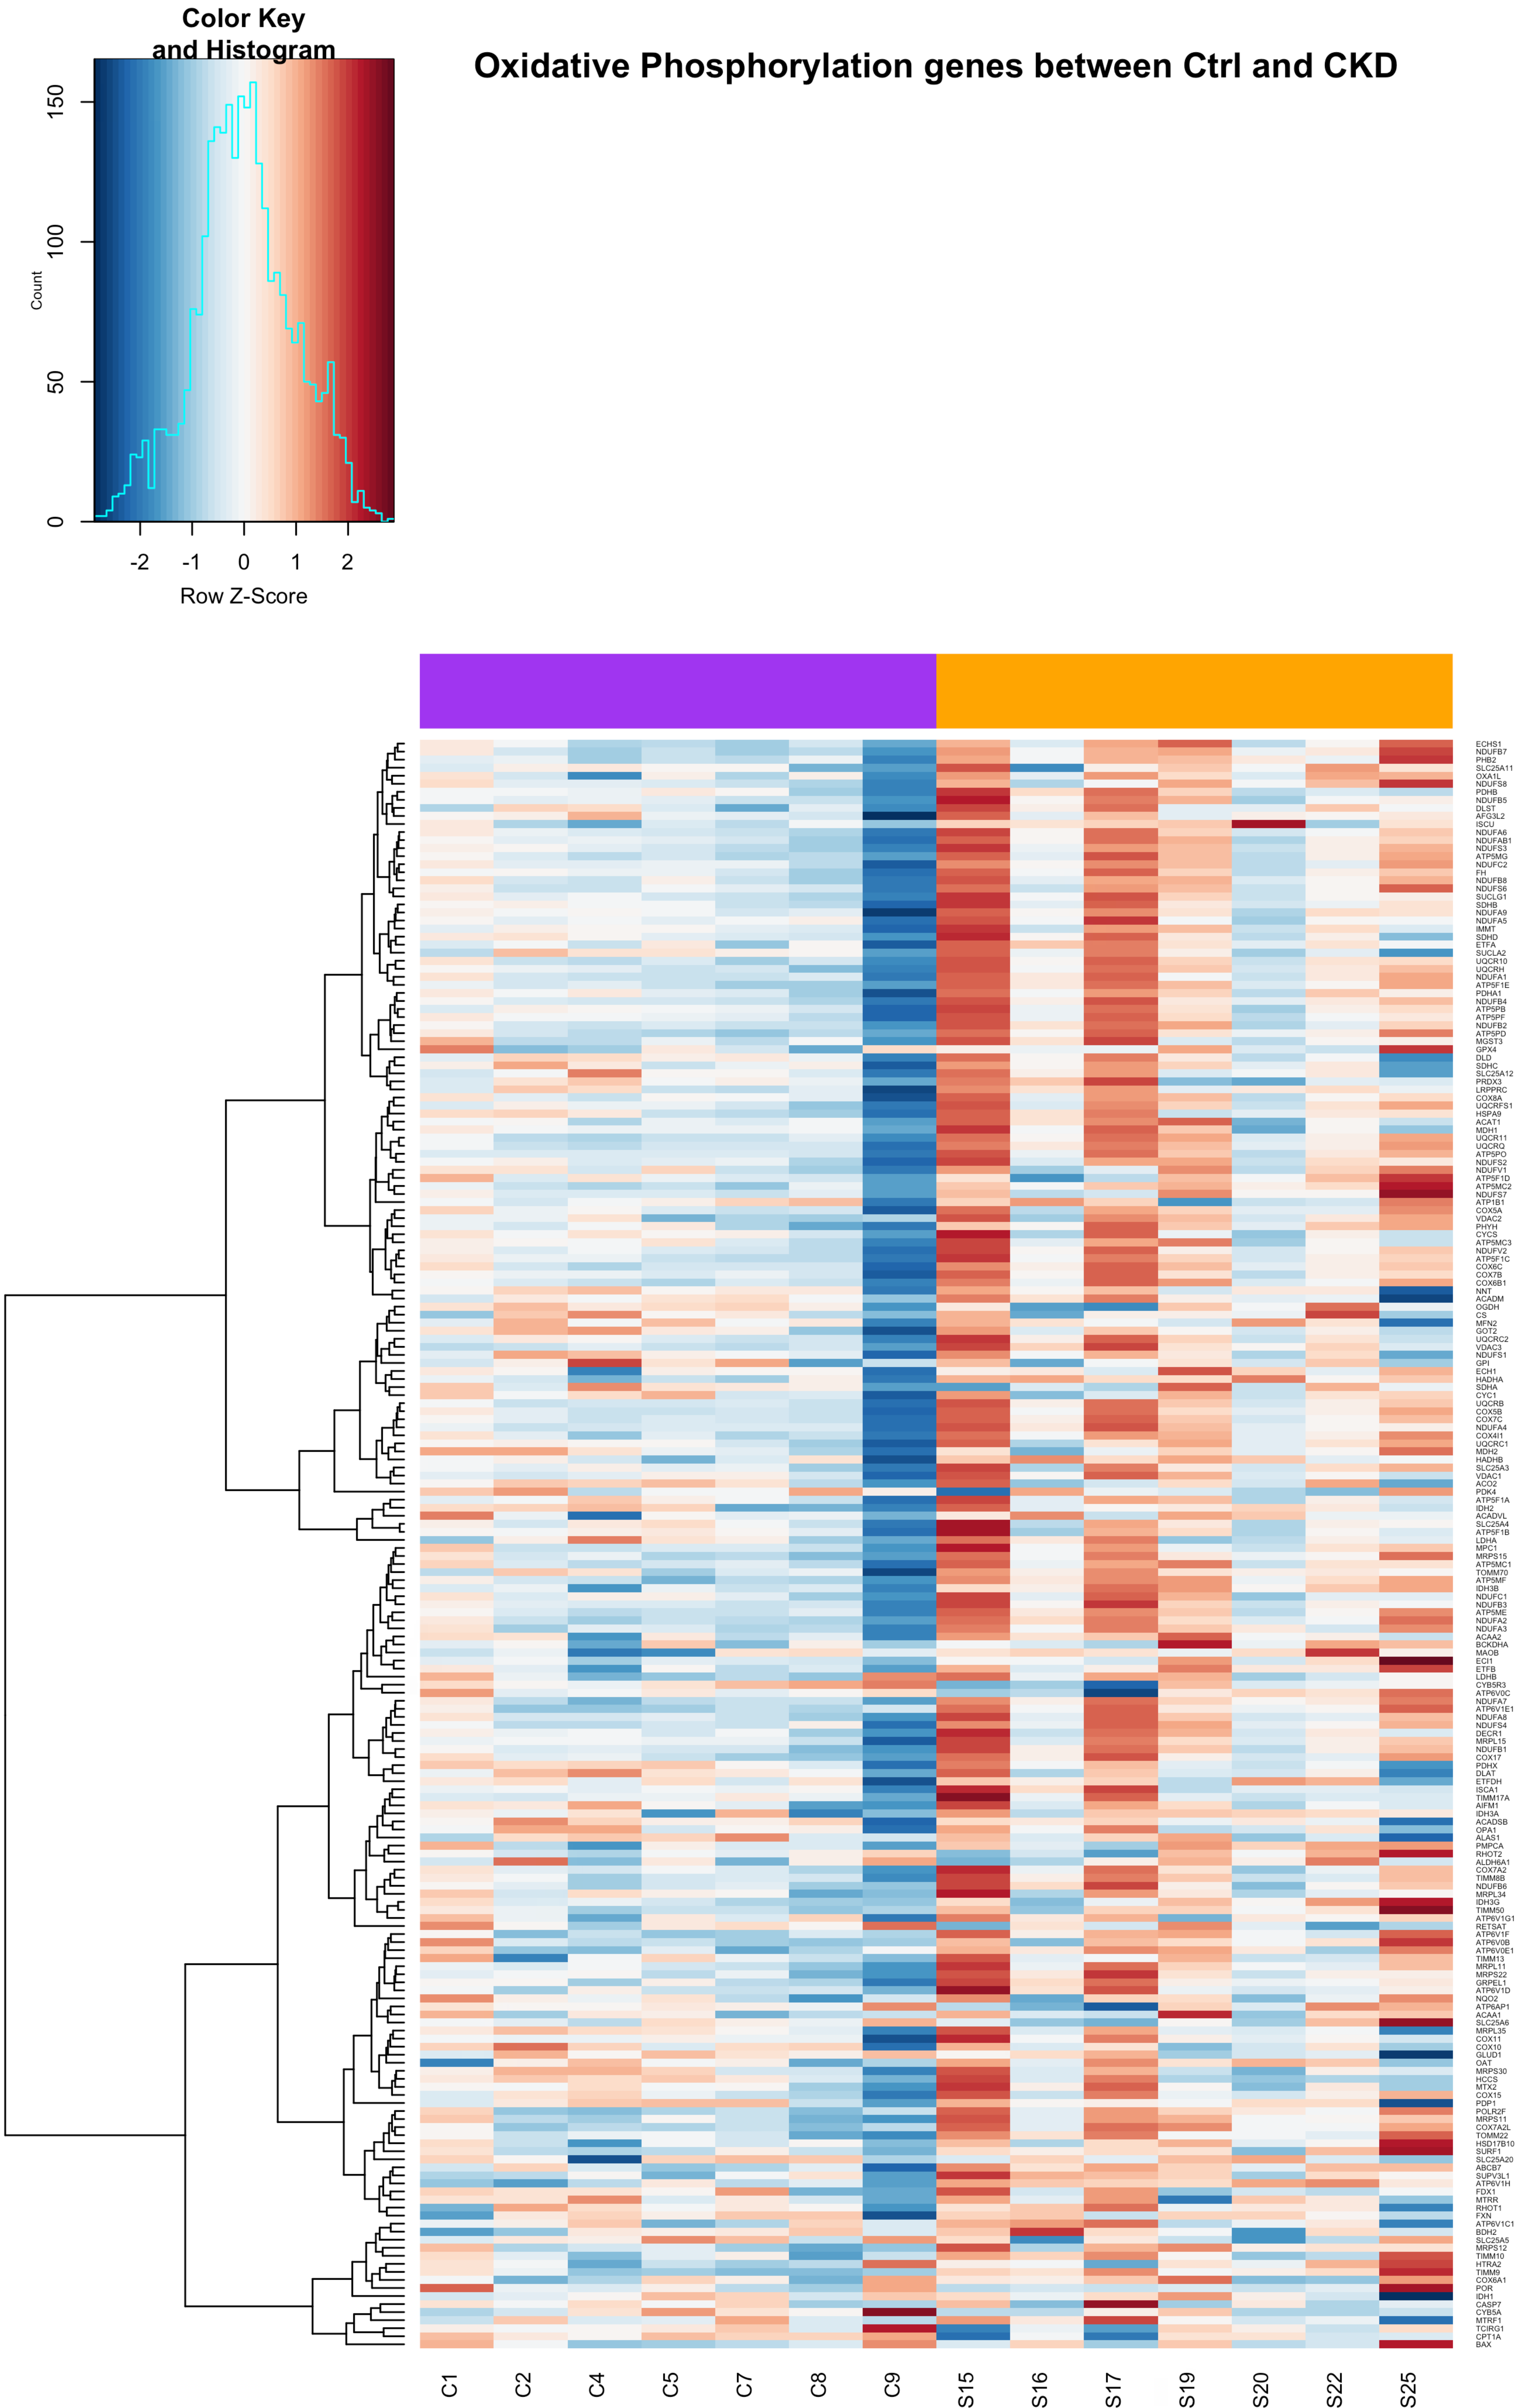

Supplementary Figure 12. Heatmap indicating expression of oxidative phosphorylation-related genes. Orange bar=CKD, purple bar=Control. n=7 Control, n=7 CKD.

Reactive Oxygen Species genes between Ctrl and CKD

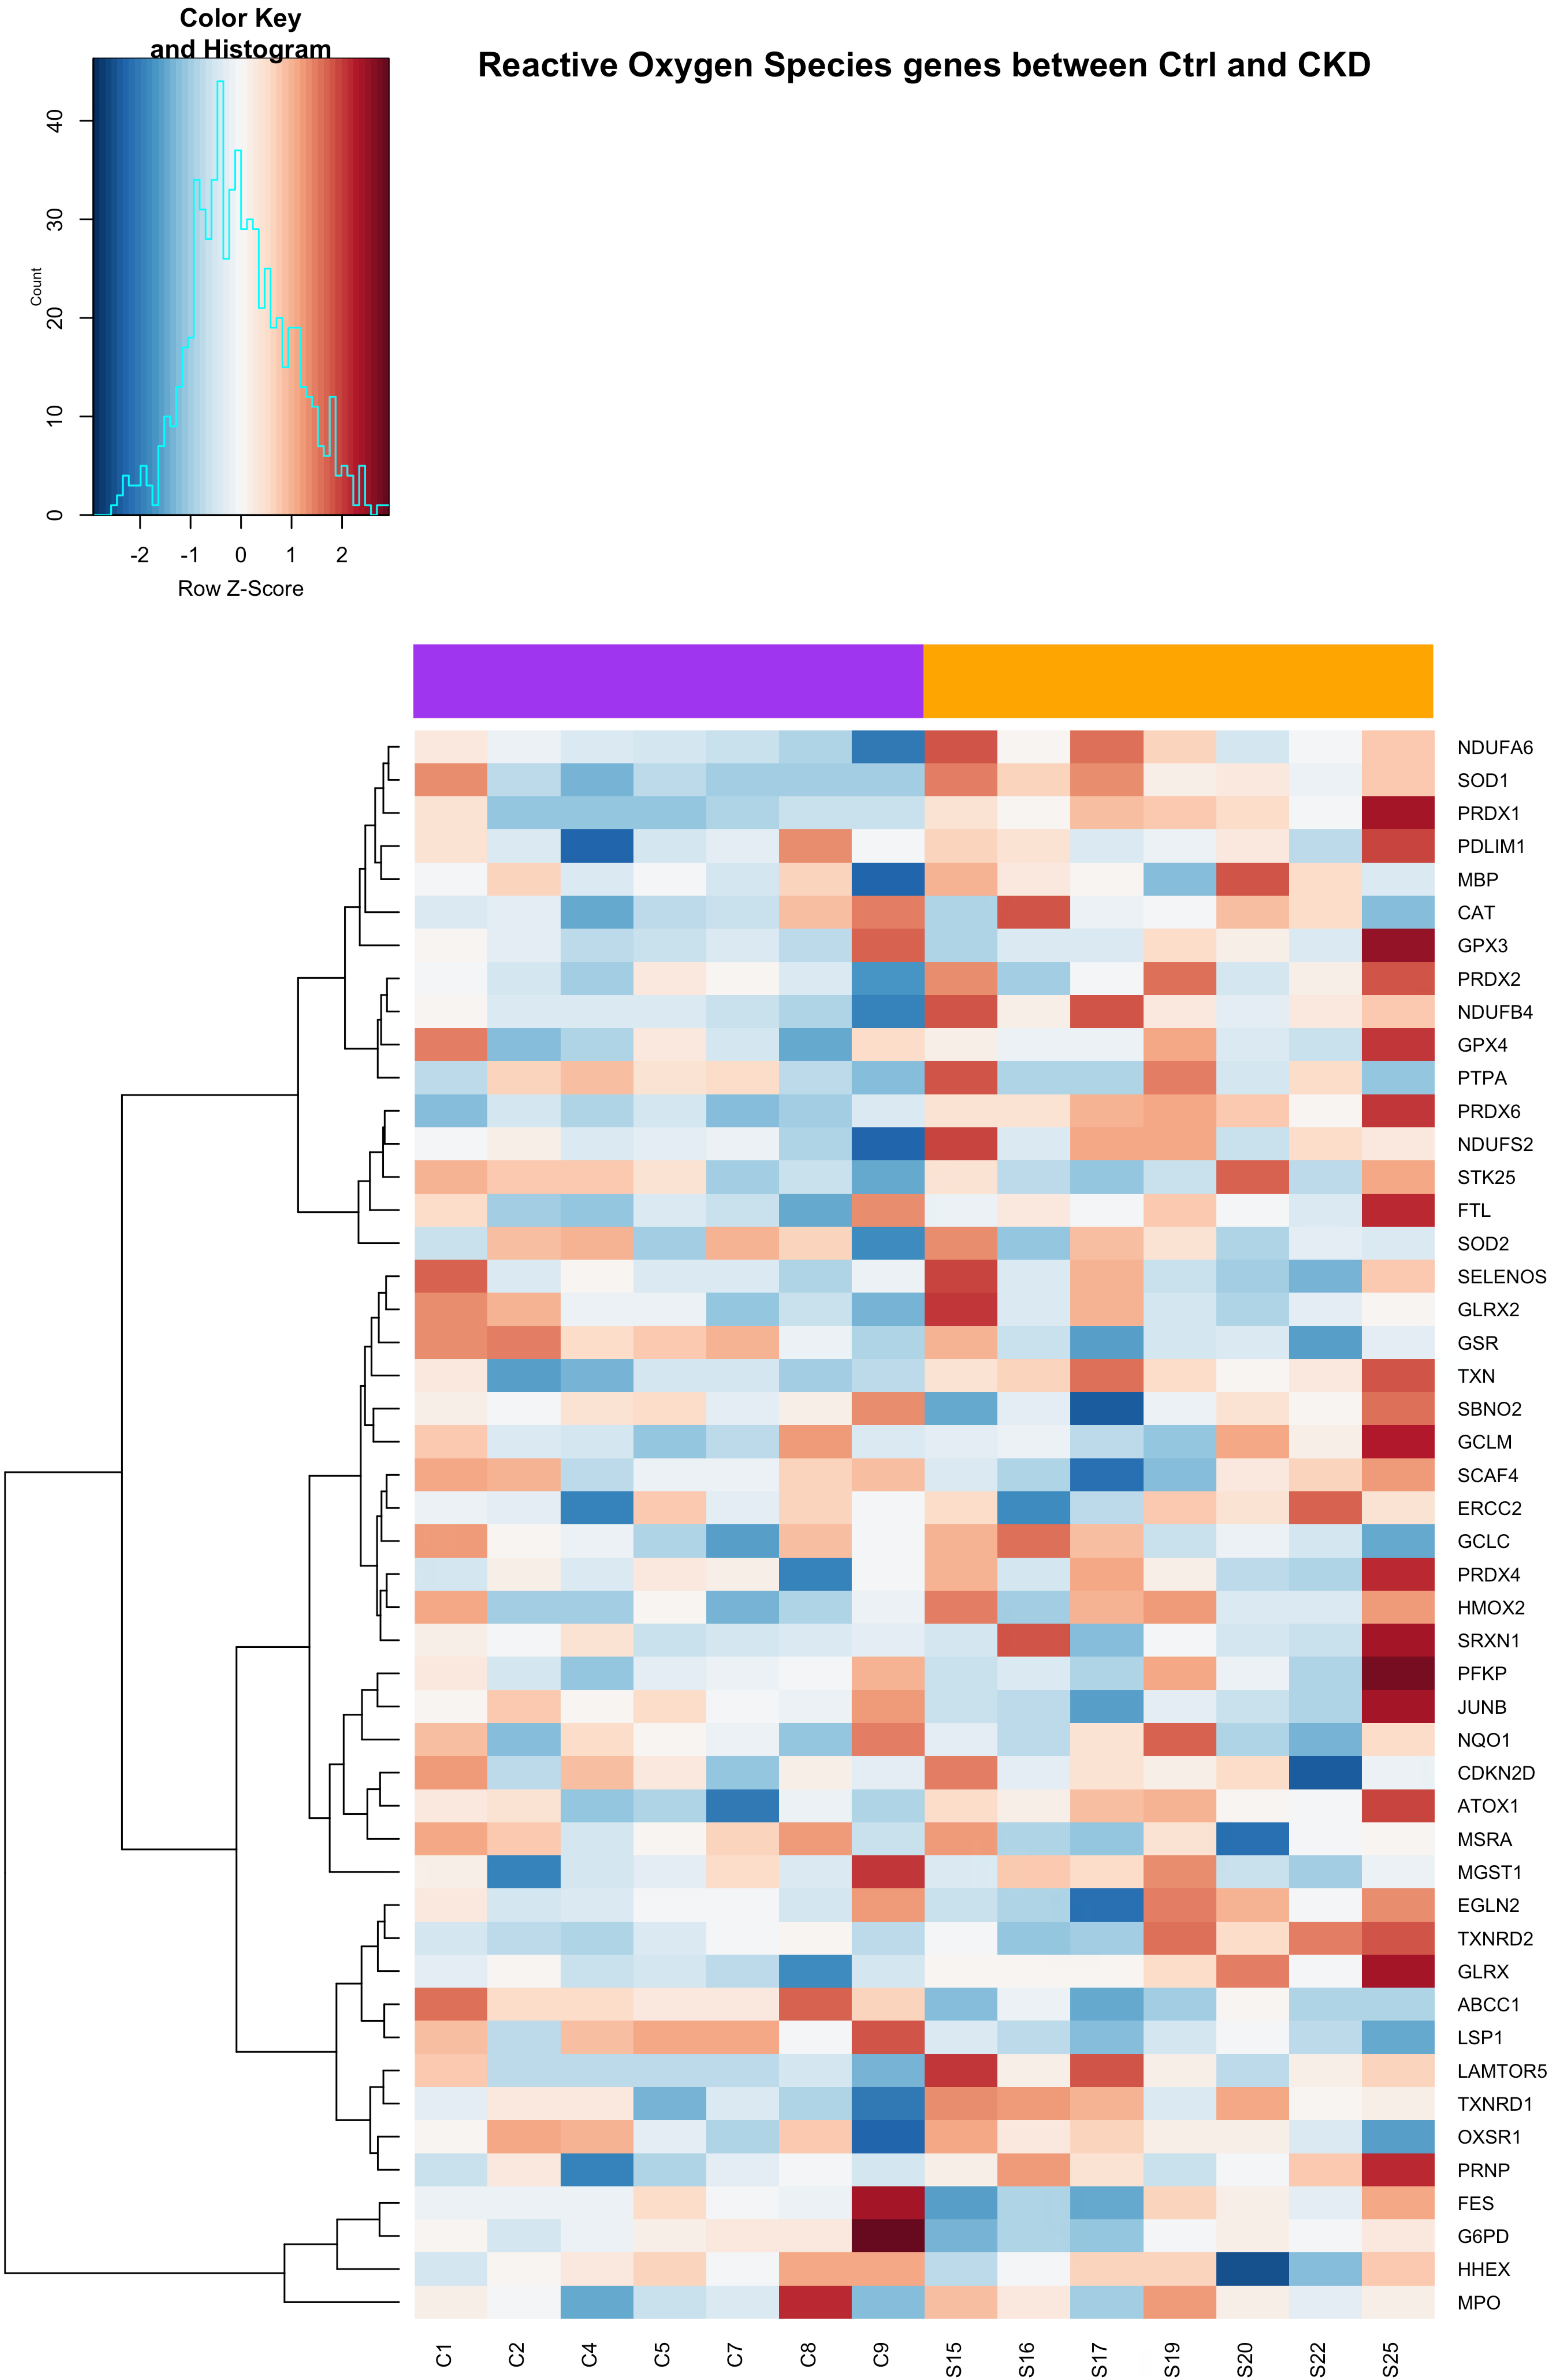

Supplementary Figure 13. Heatmap indicating expression of reactive oxygen species-related genes. Orange bar=CKD, purple bar=Control. n=7 Control, n=7 CKD.



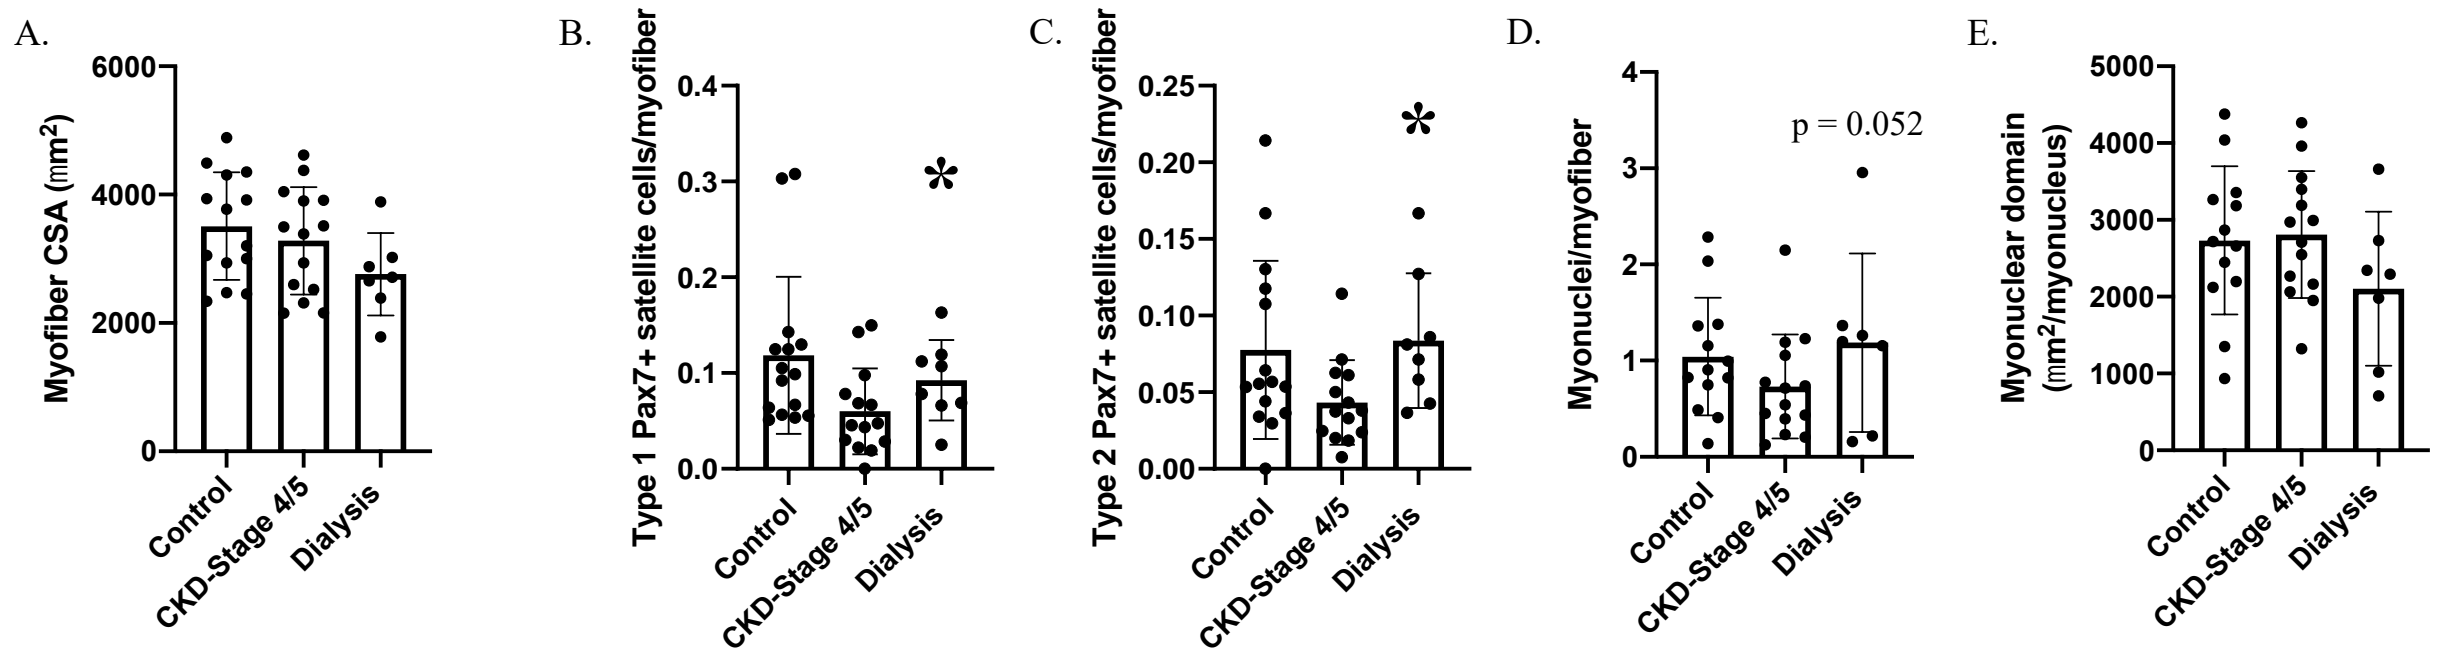

Supplemental Figure 15. The impact of dialysis on myofiber cross-sectional area (CSA), fiber type specific satellite cell abundance, and myonuclear content. A. Myofiber CSA in control, advanced stage 4/5 CKD and dialysis subjects. B. Type 1 satellite cell abundance is elevated in patients with CKD undergoing dialysis compared to patients with advanced stage 4/5 CKD not undergoing dialysis. C. F. Type 2 satellite cell abundance is elevated in patients with CKD undergoing dialysis compared to stage 4/5 patients with CKD not undergoing dialysis. D. Myonuclear density in control, advanced stage 4/5 CKD and dialysis subjects. E. Myonuclear domain in control, advanced stage 4/5 CKD and dialysis subjects. n=38. \*p<0.05 compared to CKD-Stage 4/5.

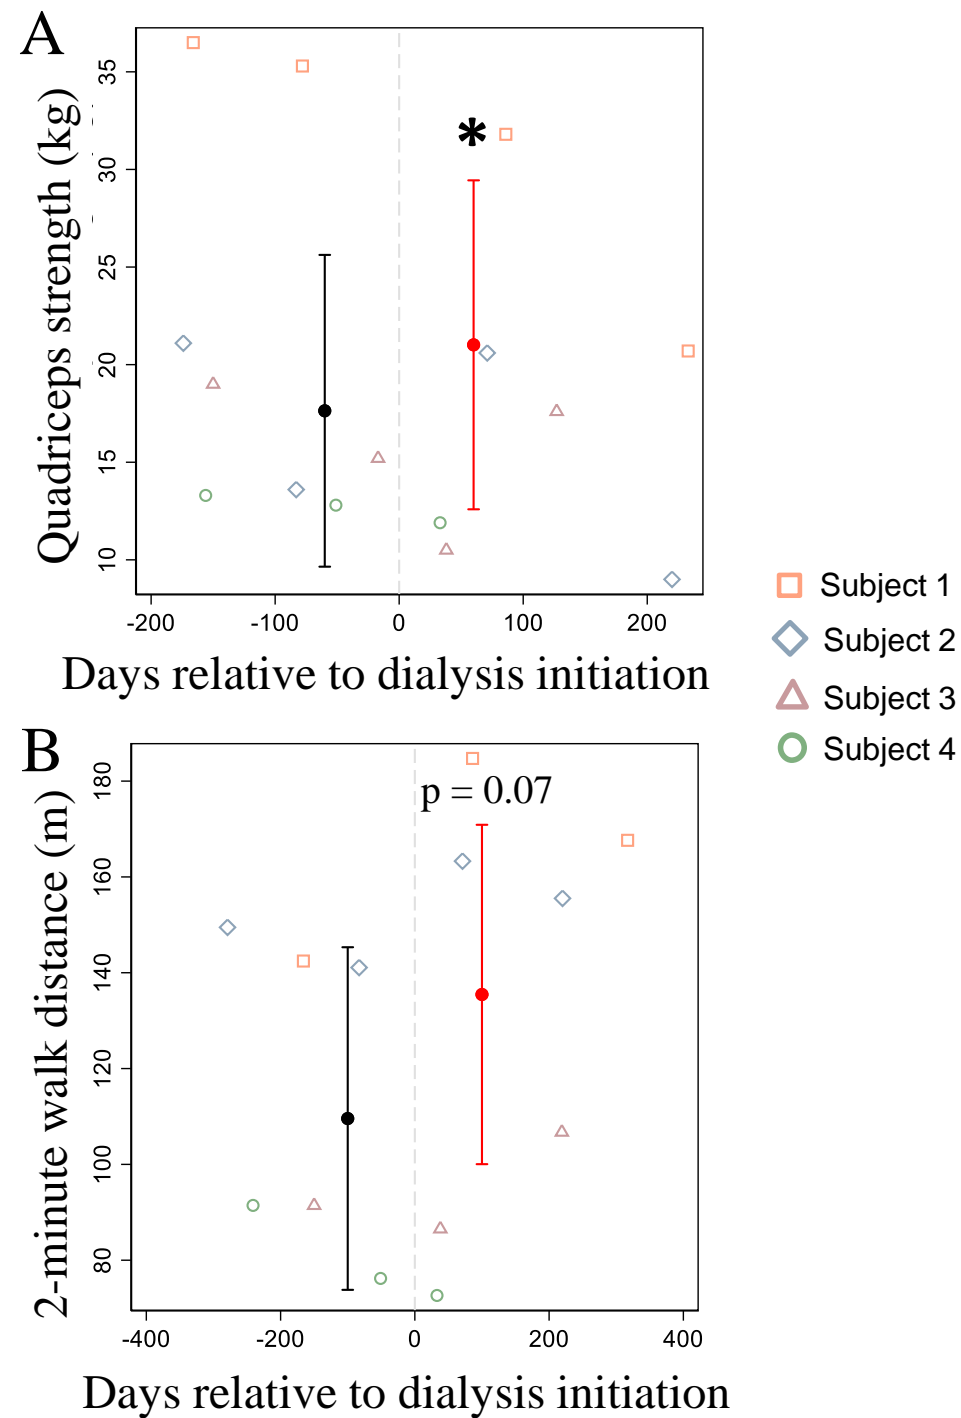

Supplementary Figure 16. Physical function in patients with CKD before and after initiation of dialysis. A. Adjusted quadriceps strength in patients with CKD before and after initiation of dialysis. B. Adjusted 2-minute walk performance in patients with CKD before and after initiation of dialysis.  $n=4$ . \* $p<0.05$  compared to pre-dialysis.



**Supplementary Table 1. Associations of eGFR (per 10 mL/min/1.73m<sup>2</sup>) with histological parameters**

|                                                                   | Unadjusted             |         | Adjusted               |        |
|-------------------------------------------------------------------|------------------------|---------|------------------------|--------|
|                                                                   | Coefficient (95% CI)   | p       | Coefficient (95% CI)   | p      |
| Sirius red (normalized to muscle area)                            | -0.6 (-0.9 to -0.4)    | <0.0001 | -0.5 (-0.9 to -0.1)    | 0.012  |
| Densely packed collagen (normalized to muscle area)*              | -0.3 (-0.4 to -0.2)    | <0.0001 | -0.3 (-0.4 to -0.1)    | 0.014  |
| Loosely packed collagen (normalized to muscle area)*              | -0.1 (-0.2 to -0.0)    | 0.016   | -0.2 (-0.3 to 0.0)     | 0.076  |
| Myofiber cross sectional area (μm <sup>2</sup> )                  | 34.5 (-67.8 to 136.8)  | 0.497   | 115.1 (-34.3 to 264.6) | 0.125  |
| Pax7+ satellite cells/myofiber*                                   | 0.1 (0.0 to 0.2)       | 0.007   | 0.1 (0.01 to 0.2)      | 0.035  |
| Type 1 Pax7+ satellite cells/myofiber                             | 0.02 (0.002 to 0.03)   | 0.028   | 0.009 (-0.01 to 0.03)  | 0.420  |
| Type 2 Pax7+ satellite cells/myofiber                             | 0.01 (-0.0002 to 0.02) | 0.054   | 0.01 (-0.004 to 0.03)  | 0.142  |
| Myonuclei/myofiber                                                | 0.1 (-0.01 to 0.1)     | 0.116   | 0.1 (-0.04 to 0.2)     | 0.230  |
| Myonuclear domain (μm <sup>2</sup> /myonucleus)                   | -18.1 (-121.7 to 85.5) | 0.724   | 3.9 (-158.7 to 166.6)  | 0.961  |
| Satellite cell-capillary distance (μm)*                           | -0.1 (-0.1 to -0.02)   | 0.008   | -0.1 (-0.2 to -0.1)    | 0.001  |
| Capillary-to-fiber perimeter exchange ratio (capillaries/1000 μm) | 0.3 (0.2 to 0.4)       | <0.0001 | 0.3 (0.1 to 0.4)       | 0.0009 |

Abbreviations: eGFR, estimated glomerular filtration rate; CI, confidence interval.

All results from linear regression models with histological parameter as dependent variable and eGFR as independent variable.

Adjusted results from models adjusted for age, sex, race, and diabetes, hypertension, and cardiovascular disease status.

\*Dependent variable was log-transformed.

Supplementary Table 2. Differentially expressed genes (DEG) between CKD and control.

| ENSEMBL_ID                   | HUGO Gene Symbol | Approved Gene Name                                           | HGNC ID    | Location      | logFC      | AveExpr    | t          | P.Value  | adj.P.Val  | B           |
|------------------------------|------------------|--------------------------------------------------------------|------------|---------------|------------|------------|------------|----------|------------|-------------|
| ENSG00000069122.19_ADGRF5    | ADGRF5           | adhesion G protein-coupled receptor F5                       | HGNC:19030 | 6p12.3        | -1.2106942 | 4.18576718 | -9.021991  | 1.90E-08 | 0.00028531 | 9.40175963  |
| ENSG000000251322.7_SHANK3    | SHANK3           | SH3 and multiple ankyrin repeat domains 3                    | HGNC:14294 | 22q13.33      | -1.2118483 | 5.04184589 | -8.3482065 | 6.51E-08 | 0.00048826 | 8.3200914   |
| ENSG000000128567.17_PODXL    | PODXL            | podocalyxin like                                             | HGNC:9171  | 7q32.3        | -1.3698975 | 4.4409812  | -7.692881  | 2.28E-07 | 0.00114002 | 7.14967746  |
| ENSG000000133561.15_GIMAP6   | GIMAP6           | GTPase, IMAP family member 6                                 | HGNC:21918 | 7q36.1        | -1.1170069 | 3.65123552 | -7.2731588 | 5.25E-07 | 0.00132431 | 6.34293101  |
| ENSG000000179144.5_GIMAP7    | GIMAP7           | GTPase, IMAP family member 7                                 | HGNC:22404 | 7q36.1        | -0.9030641 | 2.64920203 | -7.2681721 | 5.30E-07 | 0.00132431 | 6.21092915  |
| ENSG00000011252.10_SH2B3     | SH2B3            | SH2B adaptor protein 3                                       | HGNC:29605 | 12q24.12      | -0.9579406 | 3.27609788 | -7.1865094 | 6.25E-07 | 0.00133795 | 6.14963336  |
| ENSG000000173706.14_HEG1     | HEG1             | heart development protein with EGF like domains 1            | HGNC:29227 | 3q21.2        | -1.0585684 | 3.96291082 | -7.0801465 | 7.76E-07 | 0.00133795 | 6.00067763  |
| ENSG000000142192.21_APP      | APP              | amyloid beta precursor protein                               | HGNC:620   | 21q21.3       | -1.0570508 | 5.8656643  | -6.965123  | 9.81E-07 | 0.00133795 | 5.80540284  |
| ENSG000000088387.19_DOCK9    | DOCK9            | dedicator of cytokinesis 9                                   | HGNC:14132 | 13q32.3       | -0.8292133 | 3.41222043 | -6.9823362 | 9.47E-07 | 0.00133795 | 5.78712552  |
| ENSG000000205978.6_NYNRIN    | NYNRIN           | NYN domain and retroviral integrase containing               | HGNC:20165 | 14q12         | -1.5799027 | 2.45575406 | -7.0175949 | 8.81E-07 | 0.00133795 | 5.69125358  |
| ENSG000000214357.8_NEURL1B   | NEURL1B          | neuralized E3 ubiquitin protein ligase 1B                    | HGNC:35422 | 5q35.1        | -1.1100071 | 3.84119345 | -6.8462103 | 1.25E-06 | 0.00156731 | 5.54988891  |
| ENSG000000165810.17_BTNL9    | BTNL9            | butyrophilin like 9                                          | HGNC:24176 | 5q35.3        | -1.394087  | 4.68599307 | -6.517927  | 2.49E-06 | 0.00189167 | 4.9234907   |
| ENSG000000171115.4_GIMAP8    | GIMAP8           | GTPase, IMAP family member 8                                 | HGNC:21792 | 7q36.1        | -0.8659558 | 3.10481551 | -6.5389326 | 2.38E-06 | 0.00189167 | 4.91555761  |
| ENSG000000037280.16_FLT4     | FLT4             | fms related receptor tyrosine kinase 4                       | HGNC:3767  | 5q35.3        | -1.4183613 | 2.2697795  | -6.6069508 | 2.07E-06 | 0.00189167 | 4.90873823  |
| ENSG00000076067.13_RBMS2     | RBMS2            | RNA binding motif single stranded interacting protein 2      | HGNC:9909  | 12q13.3       | -0.8392912 | 3.89218297 | -6.5121862 | 2.52E-06 | 0.00189167 | 4.90217184  |
| ENSG000000170989.9_S1PR1     | S1PR1            | sphingosine-1-phosphate receptor 1                           | HGNC:3165  | 1p21.2        | -1.1144055 | 3.08079865 | -6.5125406 | 2.52E-06 | 0.00189167 | 4.86464544  |
| ENSG000000169291.10_SHE      | SHE              | Src homology 2 domain containing E                           | HGNC:27004 | 1q21.3        | -1.0551347 | 2.4216914  | -6.5342662 | 2.41E-06 | 0.00189167 | 4.8232022   |
| ENSG000000158352.15_SHROOM4  | SHROOM4          | shroom family member 4                                       | HGNC:29215 | Xp11.22       | -1.1484479 | 2.27483866 | -6.5401039 | 2.38E-06 | 0.00326178 | 4.80584133  |
| ENSG000000031081.10_ARHGAP31 | ARHGAP31         | Rho GTPase activating protein 31                             | HGNC:29216 | 3q13.32-q13.3 | -1.2968455 | 2.50407403 | -6.4402596 | 2.94E-06 | 0.00209823 | 4.65376991  |
| ENSG00000016962.15_NID1      | NID1             | nidogen 1                                                    | HGNC:7821  | 1q42.3        | -1.471553  | 3.63133203 | -6.3892909 | 3.28E-06 | 0.00210289 | 4.64472653  |
| ENSG000000127329.15_PTPRB    | PTPRB            | protein tyrosine phosphatase receptor type B                 | HGNC:9665  | 12q15         | -1.1015828 | 4.00736329 | -6.3797174 | 3.34E-06 | 0.00309781 | 4.63951668  |
| ENSG000000166341.8_DCHS1     | DCHS1            | dachsous cadherin-related 1                                  | HGNC:13681 | 11p15.4       | -1.5854788 | 3.2630433  | -6.3764672 | 3.37E-06 | 0.00210289 | 4.60059953  |
| ENSG000000179776.19_CDHS     | CDHS             | cadherin 5                                                   | HGNC:1764  | 16q21         | -1.2851393 | 4.67586958 | -6.3409922 | 3.63E-06 | 0.00217757 | 4.56876113  |
| ENSG000000106546.14_AHR      | AHR              | aryl hydrocarbon receptor                                    | HGNC:348   | 7p21.1        | -1.6068804 | 0.91864387 | -6.6232289 | 2.00E-06 | 0.00189167 | 4.47697126  |
| ENSG000000178695.5_KCTD12    | KCTD12           | potassium channel tetramerization domain containing 12       | HGNC:14678 | 13q22.3       | -1.0237906 | 3.76595161 | -6.26585   | 4.26E-06 | 0.00245938 | 4.40795827  |
| ENSG000000099250.18_NRP1     | NRP1             | neuropilin 1                                                 | HGNC:8004  | 10p11.22      | -1.0652634 | 4.68986532 | -6.2247121 | 4.66E-06 | 0.00258718 | 4.33387015  |
| ENSG000000272047.2_GTF2H5    | GTF2H5           | general transcription factor IIH subunit 5                   | HGNC:21157 | 6q25.3        | 0.66520675 | 4.77513271 | 6.09946228 | 6.11E-06 | 0.00315686 | 4.07808316  |
| ENSG000000090975.12_PITPNM2  | PITPNM2          | phosphatidylinositol transfer protein membrane associated 2  | HGNC:21044 | 12q24.31      | -1.1717244 | 2.65613585 | -6.1243851 | 5.78E-06 | 0.00309781 | 4.06060062  |
| ENSG000000144713.12_RPL32    | RPL32            | ribosomal protein L32                                        | HGNC:10336 | 3p25.2        | 0.85013396 | 8.76831    | 6.03905987 | 6.96E-06 | 0.00326178 | 3.9525533   |
| ENSG000000150760.12_DOCK1    | DOCK1            | dedicator of cytokinesis 1                                   | HGNC:2987  | 10q26.2       | -1.1983502 | 2.46780327 | -6.0744461 | 6.45E-06 | 0.00322178 | 3.94496637  |
| ENSG000000101384.12_JAG1     | JAG1             | jagged canonical Notch ligand 1                              | HGNC:6188  | 20p12.2       | -0.9393933 | 3.31359329 | -6.0034396 | 7.52E-06 | 0.00341796 | 3.8662019   |
| ENSG000000171960.11_PPIH     | PPIH             | peptidylprolyl isomerase H                                   | HGNC:14651 | 1p34.2        | 1.01339473 | 2.06247323 | 6.04776691 | 6.83E-06 | 0.00326178 | 3.80584116  |
| ENSG000000078596.11_ITM2A    | ITM2A            | integral membrane protein 2A                                 | HGNC:6173  | Xq21.1        | -0.9391871 | 3.56979872 | -5.9403549 | 8.63E-06 | 0.00380722 | 3.74437867  |
| ENSG000000171858.18_RPS21    | RPS21            | ribosomal protein S21                                        | HGNC:10409 | 20q13.33      | 0.89993908 | 7.89589051 | 5.91050362 | 9.22E-06 | 0.00394814 | 3.68786048  |
| ENSG000000221983.7_UBA52     | UBA52            | ubiquitin A-52 residue ribosomal protein fusion product 1    | HGNC:12458 | 19p13.1-p12   | 0.74661444 | 8.35944458 | 5.82413083 | 1.11E-05 | 0.00426254 | 3.50822601  |
| ENSG000000178449.9_COX14     | COX14            | cytochrome c oxidase assembly factor COX14                   | HGNC:28216 | 12q13.12      | 0.7465524  | 5.5683276  | 5.82245562 | 1.12E-05 | 0.00426254 | 3.50369636  |
| ENSG000000122026.10_RPL21    | RPL21            | ribosomal protein L21                                        | HGNC:10313 | 13q12.2       | 0.72530009 | 8.62109644 | 5.81874444 | 1.13E-05 | 0.00426254 | 3.49707109  |
| ENSG000000164125.15_GASK1B   | GASK1B           | golgi associated kinase 1B                                   | HGNC:25312 | 4q32.1        | -1.4763714 | 2.84093841 | -5.8198391 | 1.12E-05 | 0.00426254 | 3.46933146  |
| ENSG000000096433.11_ITPR3    | ITPR3            | inositol 1,4,5-trisphosphate receptor type 3                 | HGNC:6182  | 6p21.31       | -1.1826544 | 2.9658644  | -5.8119098 | 1.14E-05 | 0.00426254 | 3.4649626   |
| ENSG000000100065.15_CARD10   | CARD10           | caspase recruitment domain family member 10                  | HGNC:16422 | 22q13.1       | -1.2389964 | 2.95598871 | -5.8035957 | 1.17E-05 | 0.00426254 | 3.43868316  |
| ENSG000000169567.11_HINT1    | HINT1            | histidine triad nucleotide binding protein 1                 | HGNC:4912  | 5q23.3        | 0.66494432 | 6.58953624 | 5.78797863 | 1.21E-05 | 0.00429765 | 3.43151094  |
| ENSG000000183011.13_NAA38    | NAA38            | N-alpha-acetyltransferase 38, NatC auxiliary subunit         | HGNC:28212 | 17p13.1       | 0.83956575 | 5.30402534 | 5.77827007 | 1.23E-05 | 0.00429765 | 3.41135991  |
| ENSG000000125810.10_CD93     | CD93             | CD93 molecule                                                | HGNC:15855 | 20p11.21      | -1.1493891 | 4.64584946 | -5.7627686 | 1.28E-05 | 0.00434614 | 3.37988917  |
| ENSG000000161791.14_FMN13    | FMN13            | formin like 3                                                | HGNC:23698 | 12q13.12      | -0.8712225 | 3.54431311 | -5.7454976 | 1.32E-05 | 0.0044148  | 3.34156546  |
| ENSG000000257315.2_ZBED6     | ZBED6            | zinc finger BED-type containing 6                            | HGNC:33273 | 1q32.1        | 6.33009678 | -1.2721545 | 7.39247641 | 4.13E-07 | 0.00132431 | 3.30581311  |
| ENSG000000148357.16_HMCN2    | HMCN2            | hemicentrin 2                                                | HGNC:12193 | 9q34.11       | -1.3945726 | 5.38111206 | -5.7254504 | 1.38E-05 | 0.0044185  | 3.30051062  |
| ENSG000000166265.12_CYYR1    | CYYR1            | cysteine and tyrosine rich 1                                 | HGNC:16274 | 21q21.3       | -0.9155695 | 2.66052339 | -5.7345526 | 1.36E-05 | 0.0044185  | 3.29299708  |
| ENSG000000175899.14_A2M      | A2M              | alpha-2-macroglobulin                                        | HGNC:7     | 12p13.31      | -0.8328248 | 7.14349815 | -5.6877011 | 1.51E-05 | 0.00470362 | 3.212128981 |
| ENSG000000116016.14_EPAS1    | EPAS1            | endothelial PAS domain protein 1                             | HGNC:3374  | 2p21          | -1.0075254 | 5.97363879 | -5.6492238 | 1.64E-05 | 0.00501823 | 3.13927679  |
| ENSG000000066056.14_TIE1     | TIE1             | tyrosine kinase with immunoglobulin like and EGF like domain | HGNC:11809 | 1p34.2        | -1.1976617 | 3.42603944 | -5.5852113 | 1.89E-05 | 0.00555919 | 3.00717177  |
| ENSG000000163531.15_NFASC    | NFASC            | neurofascin                                                  | HGNC:29866 | 1q32.1        | -1.1324967 | 2.41092124 | -5.5910529 | 1.87E-05 | 0.00555919 | 2.98131325  |
| ENSG000000111145.8_ELK3      | ELK3             | ETS transcription factor ELK3                                | HGNC:3325  | 12q23.1       | -1.1717048 | 2.43822212 | -5.569231  | 1.96E-05 | 0.00564997 | 2.93707385  |
| ENSG000000233927.5_RPS28     | RPS28            | ribosomal protein S28                                        | HGNC:10418 | 19p13.2       | 0.74067915 | 8.19842878 | 5.54189373 | 2.08E-05 | 0.00577523 | 2.91436216  |
| ENSG000000108219.15_TSPAN14  | TSPAN14          | tetraspanin 14                                               | HGNC:23303 | 10q23.1       | -0.967872  | 3.82242007 | -5.5384266 | 2.10E-05 | 0.00577523 | 2.91028288  |
| ENSG000000138326.19_RPS24    | RPS24            | ribosomal protein S24                                        | HGNC:10411 | 10q22.3       | 0.74584401 | 8.84154364 | 5.53426836 | 2.12E-05 | 0.00577523 | 2.89998571  |
| ENSG000000111678.11_C12orf57 | C12orf57         | chromosome 12 open reading frame 57                          | HGNC:29521 | 12p13.31      | 0.70773737 | 5.33632084 | 5.47989143 | 2.39E-05 | 0.00629316 | 2.77975176  |
| ENSG000000130147.16_SH3BP4   | SH3BP4           | SH3 domain binding protein 4                                 | HGNC:10826 | 2q37.2        | -1.0682025 | 1.76377082 | -5.5218553 | 2.18E-05 | 0.0058316  | 2.76971794  |
| ENSG000000121858.11_TNFSF10  | TNFSF10          | TNF superfamily member 10                                    | HGNC:11925 | 3q26          | -0.8656956 | 3.45432112 | -5.4469672 | 2.58E-05 | 0.00646727 | 2.71799528  |
| ENSG000000123349.14_PFDN5    | PFDN5            | prefoldin subunit 5                                          | HGNC:8869  | 12q13.13      | 0.70767805 | 6.80222191 | 5.45065537 | 2.55E-05 | 0.00646727 | 2.71731987  |
| ENSG000000198561.13_CTNNND1  | CTNNND1          | catenin delta 1                                              | HGNC:2515  | 11q12.1       | -0.7174858 | 5.01470939 | -5.4448252 | 2.59E-05 | 0.00646727 | 2.70579357  |
| ENSG000000148400.11_NOTCH1   | NOTCH1           | notch receptor 1                                             | HGNC:7881  | 9q34.3        | -1.244921  | 3.68554562 | -5.4321236 | 2.66E-05 | 0.00651099 | 2.68681084  |
| ENSG000000103196.12_CRISPLD2 | CRISPLD2         | cysteine rich secretory protein LCCL domain containing 2     | HGNC:25248 | 16q24.1       | -1.1931733 | 2.79406144 | -5.4272089 | 2.69E-05 | 0.00651099 | 2.66570762  |
| ENSG000000120156.21_TEK      | TEK              | TEK receptor tyrosine kinase                                 | HGNC:11724 | 9p21.2        | -1.139331  | 2.53443053 | -5.3924568 | 2.91E-05 | 0.00665358 | 2.58815961  |
| ENSG000000267060.5_PTGES3L   | PTGES3L          | prostaglandin E synthase 3 like                              | HGNC:43943 | 17q21.31      | 0.89903454 | 5.30557091 | 5.38840854 | 2.94E-05 | 0.00665358 | 2.58441947  |
| ENSG000000183978.8_COA3      | COA3             | cytochrome c oxidase assembly factor 3                       | HGNC:24990 | 17q21.2       | 0.75840884 | 4.99826752 | 5.38506649 | 2.96E-05 | 0.00665358 | 2.57818254  |
| ENSG000000169504.15_CLIC4    | CLIC4            | chloride intracellular channel 4                             | HGNC:13518 | 1p36.11       | -0.8417987 | 4.31338252 | -5.3789238 | 3.00E-05 | 0.00665358 | 2.56817586  |
| ENSG000000136942.15_RPL35    | RPL35            | ribosomal protein L35                                        | HGNC:10344 | 9q33.3        | 0.79432083 | 8.65750629 | 5.35761369 | 3.15E-05 | 0.00684138 | 2.5235559   |
| ENSG000000064989.13_CALCR1   | CALCR1           | calcitonin receptor like receptor                            | HGNC:16709 | 2q32.1        | -1.1541373 | 1.83507718 | -5.3764661 | 3.02E-05 | 0.00665358 | 2.49218752  |
| ENSG000000074416.14_MGLL     | MGLL             | monoglyceride lipase                                         | HGNC:17038 | 3q21.3        | -0.979514  | 5.79489607 | -5.3377271 | 3.29E-05 | 0.00699291 | 2.47498886  |
| ENSG000000147123.10_NDUFB11  | NDUFB11          | NADH:ubiquinone oxidoreductase subunit B11                   | HGNC:20372 | Xp11.3        | 0.72489674 | 7.38757573 | 5.33520771 | 3.31E-05 | 0.00699291 | 2.47104059  |
| ENSG000000142798.20_HSPG2    | HSPG2            | heparan sulfate proteoglycan 2                               | HGNC:5273  | 1p36.12       | -1.4205899 | 6.88480258 | -5.3210252 | 3.42E-05 | 0.00711986 | 2.44062105  |
| ENSG000000182533.6_CAV3      | CAV3             | caveolin 3                                                   | HGNC:1529  | 3p25.3        | 0.74658292 | 6.08036639 | 5.30831678 | 3.52E-05 | 0.00717945 | 2.41142357  |
| ENSG00000074527.12_NTN4      | NTN4             | netrin 4                                                     | HGNC:13658 | 12q22         | -1.021249  | 2.68965518 | -5.3025208 | 3.56E-05 | 0.00717945 | 2.40977297  |
| ENSG000000213741.10_RPS29    | RPS29            | ribosomal protein S29                                        | HGNC:10419 | 14q21.3       | 0.82690122 | 7.31436219 | 5.29425805 | 3.63E-05 | 0.00717945 | 2.38140626  |
| ENSG000000130255.13_RPL36    | RPL36            | ribosomal protein L36                                        | HGNC:13631 | 19p13.3       | 0.79220321 | 7.21315452 | 5.29323387 | 3.64E-05 | 0.00717945 | 2.38031325  |
| ENSG000000154065.17_ANKRD29  | ANKRD29          | ankyrin repeat domain 29                                     | HGNC:27110 | 18q11.2       | -1.0881912 | 0.9637588  | -5.4032214 | 2.84E-05 | 0.00665358 | 2.37272899  |
|                              |                  |                                                              |            |               |            |            |            |          |            |             |

|                              |            |                                                             |            |              |            |            |            |            |            |            |
|------------------------------|------------|-------------------------------------------------------------|------------|--------------|------------|------------|------------|------------|------------|------------|
| ENSG000000095370.20_SH2D3C   | SH2D3C     | SH2 domain containing 3C                                    | HGNC:16884 | 9q34.11      | -1.0018935 | 2.80248356 | -5.0963388 | 5.69E-05   | 0.00838108 | 1.97607254 |
| ENSG00000187800.13_PEAR1     | PEAR1      | platelet endothelial aggregation receptor 1                 | HGNC:33631 | 1q23.1       | -1.1076763 | 2.94265218 | -5.0909561 | 5.76E-05   | 0.00838108 | 1.96584564 |
| ENSG0000011639.8_MRPL51      | MRPL51     | mitochondrial ribosomal protein L51                         | HGNC:14044 | 12p13.31     | 0.62631238 | 6.18817237 | 5.08953452 | 5.78E-05   | 0.00835108 | 1.93815585 |
| ENSG00000071082.11_RPL31     | RPL31      | ribosomal protein L31                                       | HGNC:10334 | 2q11.2       | 0.76012906 | 8.35021779 | 5.08263812 | 5.87E-05   | 0.00838108 | 1.93013906 |
| ENSG00000109475.16_RPL34     | RPL34      | ribosomal protein L34                                       | HGNC:10340 | 4q25         | 0.76654026 | 7.68134233 | 5.08406208 | 5.85E-05   | 0.00838108 | 1.92970828 |
| ENSG00000004399.12_PLXND1    | PLXND1     | plexin D1                                                   | HGNC:9107  | 3q22.1       | -1.1516526 | 4.68346503 | -5.0741562 | 5.98E-05   | 0.00846398 | 1.9101978  |
| ENSG00000116251.11_RPL22     | RPL22      | ribosomal protein L22                                       | HGNC:10315 | 1p36.31      | 0.62848185 | 8.16205984 | 5.06538101 | 6.10E-05   | 0.00855424 | 1.89155758 |
| ENSG00000115268.9_RPS15      | RPS15      | ribosomal protein S15                                       | HGNC:10388 | 19p13.3      | 0.62042456 | 8.38259691 | 5.05178416 | 6.30E-05   | 0.00866165 | 1.86344007 |
| ENSG00000169976.6_SF3B5      | SF3B5      | splicing factor 3b subunit 5                                | HGNC:21083 | 6q24.2       | 0.6528869  | 5.14725934 | 5.05250051 | 6.29E-05   | 0.00866165 | 1.85907654 |
| ENSG00000161281.11_COX7A1    | COX7A1     | cytochrome c oxidase subunit 7A1                            | HGNC:2287  | 19q13.12     | 0.94050127 | 9.28352478 | 5.02602659 | 6.68E-05   | 0.00892118 | 1.81366529 |
| ENSG00000120279.6_MYCT1      | MYCT1      | MYC target 1                                                | HGNC:23172 | 6q25.2       | -0.7971138 | 2.2813761  | -5.0206405 | 6.76E-05   | 0.00892118 | 1.80356816 |
| ENSG00000170860.4_LSM3       | LSM3       | LSM3 homolog, U6 small nuclear RNA and mRNA degradation     | HGNC:17874 | 3p25.1       | 0.67225514 | 5.45647065 | 5.02596994 | 6.68E-05   | 0.00892118 | 1.80020103 |
| ENSG00000198242.14_RPL23A    | RPL23A     | ribosomal protein L23a                                      | HGNC:10317 | 17q11.2      | 0.67513838 | 8.1532306  | 5.02220257 | 6.74E-05   | 0.00892118 | 1.79771426 |
| ENSG00000168497.5_CAVIN2     | CAVIN2     | caveolae associated protein 2                               | HGNC:10690 | 2q32.3       | -0.9693383 | 3.54725071 | -5.0101411 | 6.92E-05   | 0.00902821 | 1.78626721 |
| ENSG00000271811.1_Z97200.1   | Z97200.1   |                                                             |            |              | 1.8115049  | 1.17042364 | 5.13945273 | 5.16E-05   | 0.00811473 | 1.76844786 |
| ENSG00000114391.13_RPL24     | RPL24      | ribosomal protein L24                                       | HGNC:10325 | 3q12.3       | 0.70526451 | 8.17504303 | 5.00205694 | 7.05E-05   | 0.00911719 | 1.75407117 |
| ENSG00000110700.7_RPS13      | RPS13      | ribosomal protein S13                                       | HGNC:10386 | 11p15.1      | 0.71263293 | 8.53008475 | 4.99177926 | 7.22E-05   | 0.00924719 | 1.73426263 |
| ENSG00000172586.8_CHCHD1     | CHCHD1     | coiled-coil-helix-coiled-coil-helix domain containing 1     | HGNC:23518 | 10q22.2      | 0.71331772 | 4.45434499 | 4.98658965 | 7.31E-05   | 0.00924719 | 1.72250234 |
| ENSG00000163682.16_RPL9      | RPL9       | ribosomal protein L9                                        | HGNC:10369 | 4p14         | 0.89542073 | 8.29744465 | 4.9846882  | 7.34E-05   | 0.00924719 | 1.71703443 |
| ENSG00000154721.15_JAM2      | JAM2       | junctional adhesion molecule 2                              | HGNC:14686 | 21q21.3      | -0.9138442 | 2.64816977 | -4.9708694 | 7.57E-05   | 0.00938628 | 1.71057287 |
| ENSG00000147065.17_MSN       | MSN        | moesin                                                      | HGNC:7373  | Xq12         | -0.8817214 | 5.4454552  | -4.9736223 | 7.53E-05   | 0.00938628 | 1.68619599 |
| ENSG00000130021.13_PUDP      | PUDP       | pseudouridine 5'-phosphatase                                | HGNC:16818 | Xp22.31      | 0.68744866 | 4.10308779 | 4.94773204 | 7.99E-05   | 0.00965136 | 1.64387621 |
| ENSG00000197756.9_RPL37A     | RPL37A     | ribosomal protein L37a                                      | HGNC:10348 | 2q35         | 0.77594003 | 9.80817079 | 4.94564634 | 8.02E-05   | 0.00965136 | 1.64330723 |
| ENSG00000105258.9_POLR2I     | POLR2I     | RNA polymerase II subunit I                                 | HGNC:9196  | 19q13.12     | 0.78365126 | 5.32422924 | 4.94574656 | 8.02E-05   | 0.00965136 | 1.62571938 |
| ENSG00000285533.1_AP001362.2 | AP001362.2 |                                                             |            |              | 1.08228087 | 1.06101696 | 5.01918869 | 6.78E-05   | 0.00892118 | 1.61860778 |
| ENSG00000131620.17_ANO1      | ANO1       | anoctamin 1                                                 | HGNC:21625 | 11q13.3      | -1.0875432 | 2.41884578 | -4.9286264 | 8.34E-05   | 0.0097835  | 1.61644121 |
| ENSG00000156482.11_RPL30     | RPL30      | ribosomal protein L30                                       | HGNC:10333 | 8q22.2       | 0.65769218 | 8.56310125 | 4.93678957 | 8.19E-05   | 0.00974491 | 1.61500307 |
| ENSG00000112306.8_RPS12      | RPS12      | ribosomal protein S12                                       | HGNC:10385 | 6q23.2       | 0.64270565 | 8.03722554 | 4.92818692 | 8.35E-05   | 0.0097835  | 1.59221873 |
| ENSG00000163762.7_TM4SF18    | TM4SF18    | transmembrane 4 L six family member 18                      | HGNC:25181 | 3q25.1       | -1.0016034 | 1.55301398 | -4.9444835 | 8.05E-05   | 0.00965136 | 1.57891384 |
| ENSG00000010319.6_SEMA3G     | SEMA3G     | semaphorin 3G                                               | HGNC:30400 | 3p21.1       | -1.1001993 | 3.81485289 | -4.9089664 | 8.73E-05   | 0.00995093 | 1.56600948 |
| ENSG00000090924.15_PLEKHG2   | PLEKHG2    | pleckstrin homology and RhoGEF domain containing G2         | HGNC:29515 | 19q13.2      | -1.1969359 | 2.24670343 | -4.9040577 | 8.83E-05   | 0.00995093 | 1.55929661 |
| ENSG00000091409.15_ITGA6     | ITGA6      | integrin subunit alpha 6                                    | HGNC:6142  | 2q31.1       | -0.7887251 | 4.05358481 | -4.9067361 | 8.77E-05   | 0.00995093 | 1.5537983  |
| ENSG00000142541.17_RPL13A    | RPL13A     | ribosomal protein L13a                                      | HGNC:10304 | 19q13.33     | 0.62201375 | 10.174145  | 4.89558373 | 9.00E-05   | 0.00997869 | 1.53707431 |
| ENSG00000152402.10_GUCY1A2   | GUCY1A2    | guanylate cyclase 1 soluble subunit alpha 2                 | HGNC:4684  | 11q22.3      | -0.932075  | 1.53588874 | -4.8990899 | 8.93E-05   | 0.00997869 | 1.50488686 |
| ENSG00000154133.14_ROBO4     | ROBO4      | roundabout guidance receptor 4                              | HGNC:17985 | 11q24.2      | -0.9932727 | 3.95530624 | -4.8803137 | 9.32E-05   | 0.01020096 | 1.50095878 |
| ENSG00000196369.11_SRGAP2B   | SRGAP2B    | SLIT-ROBO Rho GTPase activating protein 2B                  | HGNC:35237 | 1q21.1       | -1.3710938 | 1.15610639 | -4.9245203 | 8.42E-05   | 0.00978953 | 1.50068305 |
| ENSG00000046889.19_PREX2     | PREX2      | phosphatidylinositol-3,4,5-trisphosphate dependent Rac exch | HGNC:22950 | 8q13.2       | -1.0662681 | 1.49266653 | -4.9046683 | 8.81E-05   | 0.00995093 | 1.49863167 |
| ENSG00000205336.11_ADGRG1    | ADGRG1     | adhesion G protein-coupled receptor G1                      | HGNC:4512  | 16q21        | -1.1824848 | 3.05193609 | -4.8708373 | 9.52E-05   | 0.01024255 | 1.49781424 |
| ENSG00000131831.18_RAI2      | RAI2       | retinoic acid induced 2                                     | HGNC:9835  | 2q22.13      | -0.9769528 | 1.56784113 | -4.8931134 | 9.05E-05   | 0.00997869 | 1.48781628 |
| ENSG00000171421.13_MRPL36    | MRPL36     | mitochondrial ribosomal protein L36                         | HGNC:14490 | 5p15.33      | 0.6955854  | 4.33636499 | 4.87374855 | 9.46E-05   | 0.01024255 | 1.4782507  |
| ENSG00000105722.10_ERF       | ERF        | ETS2 repressor factor                                       | HGNC:3444  | 19q13.2      | -1.0337699 | 2.29409242 | -4.8620519 | 9.72E-05   | 0.01033575 | 1.47501602 |
| ENSG00000211450.10_SELENOH   | SELENOH    | selenoprotein H                                             | HGNC:18251 | 11q12.1      | 0.64579203 | 4.78184997 | 4.86909943 | 9.56E-05   | 0.01024255 | 1.46196172 |
| ENSG00000151702.17_FLI1      | FLI1       | Fli-1 proto-oncogene, ETS transcription factor              | HGNC:3749  | 11q24.3      | -0.9274187 | 2.36566977 | -4.8428291 | 0.00010157 | 0.01040395 | 1.43737082 |
| ENSG00000134954.14_ETS1      | ETS1       | ETS proto-oncogene 1, transcription factor                  | HGNC:3488  | 11q24.3      | -0.9313732 | 4.0177574  | -4.8517338 | 9.95E-05   | 0.01033895 | 1.43435014 |
| ENSG00000115350.11_POLE4     | POLE4      | DNA polymerase epsilon 4, accessory subunit                 | HGNC:18755 | 2p12         | 0.70206797 | 4.29309811 | 4.85168251 | 9.95E-05   | 0.01033895 | 1.43140353 |
| ENSG00000165757.9_JCAD       | JCAD       | junctional cadherin 5 associated                            | HGNC:29283 | 10p11.23     | -0.8530047 | 3.54287827 | -4.8410384 | 0.00010199 | 0.01040395 | 1.42278127 |
| ENSG00000255690.2_TRIL       | TRIL       | TLR4 interactor with leucine rich repeats                   | HGNC:22200 | 7p14.3       | -1.4800999 | 1.80330752 | -4.8565873 | 9.84E-05   | 0.01033895 | 1.41886795 |
| ENSG00000125743.10_SNRPD2    | SNRPD2     | small nuclear ribonucleoprotein D2 polypeptide              | HGNC:11159 | 19q13.2-q13. | 0.72028884 | 5.37680337 | 4.84973218 | 1.00E-04   | 0.01033895 | 1.41532192 |
| ENSG00000142534.7_RPS11      | RPS11      | ribosomal protein S11                                       | HGNC:10384 | 19q13.3      | 0.63265879 | 9.2123038  | 4.82962508 | 0.0001047  | 0.01060818 | 1.387107   |
| ENSG00000089057.15_SLC23A2   | SLC23A2    | solute carrier family 23 member 2                           | HGNC:10973 | 20p13        | -0.868512  | 2.26650478 | -4.8183766 | 0.00010744 | 0.01064844 | 1.38170966 |
| ENSG00000130158.14_DOCK6     | DOCK6      | dedicator of cytokinesis 6                                  | HGNC:19189 | 19p13.2      | -1.1325331 | 3.99845727 | -4.8254377 | 0.00010572 | 0.01063886 | 1.38030022 |
| ENSG00000161649.13_CD300LG   | CD300LG    | CD300 molecule like family member g                         | HGNC:30455 | 17q21.31     | -1.3314644 | 2.61329641 | -4.8053279 | 0.00011072 | 0.01078044 | 1.36007133 |
| ENSG00000107223.13_EDF1      | EDF1       | endothelial differentiation related factor 1                | HGNC:3164  | 9q34.3       | 0.70670998 | 6.86868709 | 4.80713427 | 0.00011026 | 0.01078044 | 1.32230877 |
| ENSG00000241468.7_ATP5MF     | ATP5MF     | ATP synthase membrane subunit f                             | HGNC:848   | 7q22.1       | 0.61485252 | 6.54358222 | 4.79857001 | 0.00011245 | 0.01085309 | 1.30286556 |
| ENSG00000120318.16_ARAP3     | ARAP3      | ArfGAP with RhoGAP domain, ankyrin repeat and PH domain     | HGNC:24097 | 5q31.3       | -0.8072574 | 3.13983217 | -4.7791377 | 0.00011759 | 0.01085309 | 1.29760443 |
| ENSG00000126217.21_MCF2L     | MCF2L      | MCF.2 cell line derived transforming sequence like          | HGNC:14576 | 13q34        | -1.0544425 | 4.03471649 | -4.7842462 | 0.00011622 | 0.01085309 | 1.29565682 |
| ENSG00000168894.9_RNF181     | RNF181     | ring finger protein 181                                     | HGNC:28037 | 2p11.2       | 0.72768678 | 4.37875756 | 4.78436848 | 0.00011618 | 0.01085309 | 1.28329641 |
| ENSG00000172809.13_RPL38     | RPL38      | ribosomal protein L38                                       | HGNC:10349 | 17q25.1      | 0.76828113 | 8.20131803 | 4.78137278 | 0.00011699 | 0.01085309 | 1.27272713 |
| ENSG00000267855.5_NDUFA7     | NDUFA7     | NADH:ubiquinone oxidoreductase subunit A7                   | HGNC:7691  | 19p13.2      | 0.64807947 | 6.21797644 | 4.78455494 | 0.00011614 | 0.01085309 | 1.27163575 |
| ENSG00000115414.19_FN1       | FN1        | fibronectin 1                                               | HGNC:3778  | 2q35         | -1.2387414 | 5.6839988  | -4.7818786 | 0.00011685 | 0.01085309 | 1.26654175 |
| ENSG00000137726.17_FXYD6     | FXYD6      | FXYD domain containing ion transport regulator 6            | HGNC:4030  | 11q23.3      | -0.8298495 | 3.44136059 | -4.7676463 | 0.00012074 | 0.01085309 | 1.26606647 |
| ENSG00000139668.9_WDFY2      | WDFY2      | WD repeat and FYVE domain containing 2                      | HGNC:20482 | 13q14.3      | -1.1049583 | 1.13471634 | -4.8214121 | 0.0001067  | 0.01064844 | 1.26442139 |
| ENSG00000240583.12_AQP1      | AQP1       | aquaporin 1 (Colton blood group)                            | HGNC:633   | 7p14.3       | -0.9981583 | 6.31607183 | -4.7773895 | 0.00011807 | 0.01085309 | 1.25691997 |
| ENSG00000110442.12_COMMD9    | COMMD9     | COMM domain containing 9                                    | HGNC:25014 | 11p13        | 0.51055486 | 4.70534887 | 4.77148505 | 0.00011968 | 0.01085309 | 1.248141   |
| ENSG00000143947.13_RPS27A    | RPS27A     | ribosomal protein S27a                                      | HGNC:10417 | 2p16.1       | 0.64590449 | 7.78907901 | 4.76718419 | 0.00012087 | 0.01085309 | 1.23847711 |
| ENSG00000143436.11_MRPL9     | MRPL9      | mitochondrial ribosomal protein L9                          | HGNC:14277 | 1q21.3       | 0.51073139 | 4.90128582 | 4.76430797 | 0.00012167 | 0.01086015 | 1.23041261 |
| ENSG00000213949.9_ITGA1      | ITGA1      | integrin subunit alpha 1                                    | HGNC:6134  | 5q11.2       | -0.7052148 | 3.38574048 | -4.7494913 | 0.0001259  | 0.01097335 | 1.22788113 |
| ENSG00000132530.17_XAF1      | XAF1       | XIAP associated factor 1                                    | HGNC:30932 | 17p13.2      | -1.408246  | 2.61839883 | -4.7427016 | 0.00012788 | 0.01099507 | 1.22715946 |
| ENSG00000113555.5_PCDH12     | PCDH12     | protocadherin 12                                            | HGNC:8657  | 5q31.3       | -1.1851055 | 2.03989234 | -4.7471    | 0.00012659 | 0.01097335 | 1.22372458 |
| ENSG00000167862.10_MRPL58    | MRPL58     | mitochondrial ribosomal protein L58                         | HGNC:5359  | 17q25.1      | 0.68579434 | 4.74359622 | 4.75814124 | 0.00012341 | 0.01095027 | 1.21954618 |
| ENSG00000188186.10_LAMTOR4   | LAMTOR4    | late endosomal/lysosomal adaptor, MAPK and MTOR activato    | HGNC:33772 | 7q22.1       | 0.53481707 | 4.63141266 | 4.75351558 | 0.00012474 | 0.01097335 | 1.2106117  |
| ENSG00000165502.6_RPL36AL    | RPL36AL    | ribosomal protein L36a like                                 | HGNC:10346 | 14q21.3      | 0.75614065 | 6.04271114 | 4.7470689  | 0.0001266  | 0.01097335 | 1.18918236 |
| ENSG00000184014.8_DENND5A    | DENND5A    | DENN domain containing 5A                                   | HGNC:19344 | 11p15.4      | -0.5085335 | 4.36424513 | -4.7399885 | 0.00012868 | 0.01099507 | 1.18323849 |
| ENSG00000168509.20_HJV       | HJV        | hemojuvelin BMP co-receptor                                 | HGNC:4887  | 12p21.1      | 0.67315139 | 8.41473194 | 4.73413651 | 0.00013043 | 0.01099507 | 1.17090728 |
| ENSG00000087303.18_NID2      | NID2       | nidogen 2                                                   | HGNC:13389 | 14q22.1      | -1.5170898 | 1.51798388 | -4.7380381 | 0.00012926 | 0.01099507 | 1.16690066 |
| ENSG00000117592.9_PRDX6      | PRDX6      | peroxiredoxin 6                                             | HGNC:16753 | 1q25.1       | 0.52255933 | 7.95882232 | 4.73155915 | 0.00013121 | 0.01099507 | 1.16152038 |
| ENSG00000102024.18_PLS3      | PLS3       | plastin 3                                                   | HGNC:9091  | Xq23         | -0.6762343 | 4.46249674 | -4.7305822 | 0.0        |            |            |

|                               |           |                                                              |            |              |            |            |            |            |            |            |
|-------------------------------|-----------|--------------------------------------------------------------|------------|--------------|------------|------------|------------|------------|------------|------------|
| ENSG000000163157.15_TM0D4     | TM0D4     | tropomodulin 4                                               | HGNC:11874 | 1q21.3       | 0.60658463 | 8.71407158 | 4.631551   | 0.00016526 | 0.01216095 | 0.94892834 |
| ENSG000000116586.11_LAMTOR2   | LAMTOR2   | late endosomal/lysosomal adaptor, MAPK and MTOR activator    | HGNC:29796 | 1q22         | 0.54847889 | 4.57380646 | 4.62989321 | 0.0001659  | 0.01216095 | 0.94014214 |
| ENSG000000100410.8_PHF5A      | PHF5A     | PHD finger protein 5A                                        | HGNC:18000 | 22q13.2      | 0.63303656 | 3.14146115 | 4.60492785 | 0.00017575 | 0.01246686 | 0.92466686 |
| ENSG000000162244.11_RPL29     | RPL29     | ribosomal protein L29                                        | HGNC:10331 | 3p21.2       | 0.73314222 | 9.18052407 | 4.61720117 | 0.00017083 | 0.01226294 | 0.92213912 |
| ENSG000000008988.9_RPS20      | RPS20     | ribosomal protein S20                                        | HGNC:10405 | 8q12.1       | 0.64092681 | 8.56538317 | 4.61249839 | 0.0001727  | 0.01226294 | 0.9054262  |
| ENSG000000151500.15_THYN1     | THYN1     | thymocyte nuclear protein 1                                  | HGNC:29560 | 11q25        | 0.51008872 | 3.32827672 | 4.59829934 | 0.00017846 | 0.01244677 | 0.9053082  |
| ENSG000000103647.12_CORO2B    | CORO2B    | coronin 2B                                                   | HGNC:2256  | 15q23        | -1.2685662 | 0.91157344 | -4.6481974 | 0.00015903 | 0.01199725 | 0.90012423 |
| ENSG000000198830.11_HMGN2     | HMGN2     | high mobility group nucleosomal binding domain 2             | HGNC:4986  | 1p36.11      | 0.68533379 | 6.71751383 | 4.61364001 | 0.00017225 | 0.01226294 | 0.89630933 |
| ENSG000000169994.18_MYO7B     | MYO7B     | myosin VIIb                                                  | HGNC:7607  | 2q14.3       | -1.3087258 | 1.17851861 | -4.6176848 | 0.00017064 | 0.01226294 | 0.88652827 |
| ENSG000000105971.15_CAV2      | CAV2      | caveolin 2                                                   | HGNC:1528  | 7q31.2       | -0.8591487 | 3.38583512 | -4.5914862 | 0.0001813  | 0.01249389 | 0.88312669 |
| ENSG000000142676.14_RPL11     | RPL11     | ribosomal protein L11                                        | HGNC:10301 | 1p36.11      | 0.60235701 | 7.98594028 | 4.60321392 | 0.00017645 | 0.01236366 | 0.87943147 |
| ENSG000000007237.18_GAS7      | GAS7      | growth arrest specific 7                                     | HGNC:4169  | 17p13.1      | -1.2765342 | 3.64756774 | -4.5860363 | 0.0001836  | 0.01251377 | 0.86806009 |
| ENSG000000210140.1_MT-TC      | MT-TC     | mitochondrially encoded tRNA-Cys (UGU/C)                     | HGNC:7477  | mitochondria | 1.79269065 | -0.615243  | 5.11876897 | 5.41E-05   | 0.00818726 | 0.86676555 |
| ENSG000000137033.11_IL33      | IL33      | interleukin 33                                               | HGNC:16028 | 9p24.1       | -1.114256  | 1.67860731 | -4.5800523 | 0.00018616 | 0.01263075 | 0.86533906 |
| ENSG000000172590.18_MRPL52    | MRPL52    | mitochondrial ribosomal protein L52                          | HGNC:16655 | 14q11.2      | 0.73280666 | 4.44103251 | 4.59067255 | 0.00018164 | 0.01249389 | 0.85716144 |
| ENSG000000173376.14_NDNF      | NDNF      | neuron derived neurotrophic factor                           | HGNC:26256 | 4q27         | -1.4079338 | 0.29890225 | -4.6853994 | 0.00014594 | 0.01166427 | 0.85583492 |
| ENSG000000185608.8_MRPL40     | MRPL40    | mitochondrial ribosomal protein L40                          | HGNC:14491 | 22q11.21     | 0.50647103 | 5.26539316 | 4.59449825 | 0.00018004 | 0.01249389 | 0.85431172 |
| ENSG000000055813.6_CDC85A     | CDC85A    | coiled-coil domain containing 85A                            | HGNC:29400 | 2p16.1       | -1.8139617 | 0.49236114 | -4.6811598 | 0.00014738 | 0.01166427 | 0.85259427 |
| ENSG000000205730.6_ITPRIPL2   | ITPRIPL2  | ITPRIP like 2                                                | HGNC:27257 | 16p12.3      | -0.6627647 | 3.45695451 | -4.5735879 | 0.00018896 | 0.01270606 | 0.84345624 |
| ENSG000000150456.10_EEF1AKMT1 | EEF1AKMT1 | EEF1A lysine methyltransferase 1                             | HGNC:27351 | 13q12.11     | 0.85144751 | 1.85386946 | 4.5687304  | 0.0001911  | 0.01274056 | 0.8413584  |
| ENSG000000131697.18_NPHP4     | NPHP4     | nephrocystin 4                                               | HGNC:19104 | 1p36.31      | -1.260784  | 0.97483785 | -4.6108143 | 0.00017337 | 0.01274056 | 0.82292087 |
| ENSG000000113558.18_SKP1      | SKP1      | S-phase kinase associated protein 1                          | HGNC:10899 | 5q31.1       | 0.54170347 | 7.74353869 | 4.57679185 | 0.00018756 | 0.01266905 | 0.81969324 |
| ENSG000000003400.14_CASP10    | CASP10    | caspase 10                                                   | HGNC:1500  | 2q33.1       | -0.7433148 | 2.18669203 | -4.5479011 | 0.00020053 | 0.01285034 | 0.81261376 |
| ENSG000000101695.9_RNF125     | RNF125    | ring finger protein 125                                      | HGNC:21150 | 18q12.1      | -1.3641113 | 1.71863601 | -4.5519494 | 0.00019866 | 0.01278513 | 0.80362236 |
| ENSG000000100626.17_GALNT16   | GALNT16   | polypeptide N-acetylgalactosaminyltransferase 16             | HGNC:23233 | 14q24.1      | -1.2941675 | 2.79245281 | -4.5435863 | 0.00020255 | 0.0128624  | 0.80192601 |
| ENSG000000105193.9_RPS16      | RPS16     | ribosomal protein S16                                        | HGNC:10396 | 19q13.2      | 0.76966004 | 8.91402013 | 4.5609408  | 0.00019457 | 0.01274056 | 0.79582911 |
| ENSG000000106400.12_ZNHIT1    | ZNHIT1    | zinc finger HIT-type containing 1                            | HGNC:21688 | 7q22.1       | 0.57736405 | 5.30409174 | 4.56626761 | 0.00019219 | 0.01274056 | 0.79190665 |
| ENSG000000182899.16_RPL35A    | RPL35A    | ribosomal protein L35a                                       | HGNC:10345 | 3q29         | 0.66271262 | 7.70925684 | 4.56263199 | 0.00019381 | 0.01274056 | 0.78814041 |
| ENSG000000243927.6_MRPS6      | MRPS6     | mitochondrial ribosomal protein S6                           | HGNC:14051 | 21q22.11     | 0.68767231 | 4.90344228 | 4.56207961 | 0.00019406 | 0.01274056 | 0.78543912 |
| ENSG000000173141.5_MRPL57     | MRPL57    | mitochondrial ribosomal protein L57                          | HGNC:14514 | 13q12.11     | 0.55721149 | 5.2838812  | 4.56302846 | 0.00019363 | 0.01274056 | 0.78494201 |
| ENSG000000152952.12_PLOD2     | PLOD2     | procollagen-lysine,2-oxoglutarate 5-dioxygenase 2            | HGNC:9082  | 3q24         | -1.111389  | 1.21343984 | -4.5569031 | 0.0001964  | 0.01278513 | 0.77300794 |
| ENSG000000173113.6_TRMT112    | TRMT112   | tRNA methyltransferase subunit 11-2                          | HGNC:26940 | 11q13.1      | 0.65248886 | 5.51179015 | 4.55566884 | 0.00019696 | 0.01278513 | 0.76780008 |
| ENSG000000134369.15_NAV1      | NAV1      | neuron navigator 1                                           | HGNC:15989 | 1q32.1       | -0.8916485 | 3.10562324 | -4.5329751 | 0.00020758 | 0.0128624  | 0.76718228 |
| ENSG000000205323.9_SARNP      | SARNP     | SAP domain containing ribonucleoprotein                      | HGNC:24432 | 12q13.2      | 0.59653632 | 4.91397985 | 4.55245009 | 0.00019843 | 0.01278513 | 0.76483218 |
| ENSG000000175423.21_DPH5      | DPH5      | diphthamide biosynthesis 5                                   | HGNC:24270 | 1p21.2       | 0.67867556 | 3.10446502 | 4.5305735  | 0.00020874 | 0.01287525 | 0.76478554 |
| ENSG000000149639.15_SOGA1     | SOGA1     | suppressor of glucose, autophagy associated 1                | HGNC:16111 | 20q11.23     | -1.0232746 | 3.17910054 | -4.5230236 | 0.00021242 | 0.01287525 | 0.74628641 |
| ENSG000000131469.14_RPL27     | RPL27     | ribosomal protein L27                                        | HGNC:10328 | 17q21.31     | 0.6720696  | 8.58269577 | 4.5385641  | 0.00020491 | 0.0128624  | 0.74297256 |
| ENSG000000198755.11_RPL10A    | RPL10A    | ribosomal protein L10a                                       | HGNC:10299 | 6p21.31      | 0.62670279 | 8.12718612 | 4.5404396  | 0.00020403 | 0.0128624  | 0.74241461 |
| ENSG000000146007.10_ZMAT2     | ZMAT2     | zinc finger matrix-type 2                                    | HGNC:26433 | 5q31.3       | 0.4649928  | 5.45212964 | 4.53734752 | 0.00020549 | 0.0128624  | 0.72726626 |
| ENSG000000149806.11_FAU       | FAU       | FAU ubiquitin like and ribosomal protein S30 fusion          | HGNC:3597  | 11q13.1      | 0.59347906 | 7.61212925 | 4.53351677 | 0.00020732 | 0.0128624  | 0.72326131 |
| ENSG000000108298.11_RPL19     | RPL19     | ribosomal protein L19                                        | HGNC:10312 | 17q12        | 0.59426019 | 8.93554711 | 4.52680961 | 0.00021057 | 0.01287525 | 0.7213667  |
| ENSG000000162384.14_CZIB      | CZIB      | CXXC motif containing zinc binding protein                   | HGNC:26059 | 1p32.3       | 0.56300495 | 5.45801211 | 4.5340752  | 0.00020705 | 0.0128624  | 0.72018766 |
| ENSG000000221818.9_EBF2       | EBF2      | EBF transcription factor 2                                   | HGNC:19090 | 8p21.2       | -1.0535398 | 2.07904222 | -4.5020037 | 0.00022302 | 0.01327059 | 0.71567206 |
| ENSG000000134419.15_RPS15A    | RPS15A    | ribosomal protein S15a                                       | HGNC:10389 | 16p12.3      | 0.65082783 | 8.53862843 | 4.52256235 | 0.00021265 | 0.01287525 | 0.70727902 |
| ENSG000000154529.14_CNTNAP3B  | CNTNAP3B  | contactin associated protein family member 3B                | HGNC:32035 | 9p11.2       | -1.8920731 | 0.42965886 | -4.647301  | 0.00015936 | 0.01199725 | 0.69990955 |
| ENSG000000185760.15_KCNQ5     | KCNQ5     | potassium voltage-gated channel subfamily Q member 5         | HGNC:6299  | 6q13         | 1.23240437 | 5.11357136 | 4.52196762 | 0.00021294 | 0.01287525 | 0.6985182  |
| ENSG000000084623.11_EIF3I     | EIF3I     | eukaryotic translation initiation factor 3 subunit I         | HGNC:3272  | 1p35.2       | 0.57287682 | 6.3370822  | 4.52325698 | 0.00021231 | 0.01287525 | 0.69613215 |
| ENSG000000273749.5_CYFIP1     | CYFIP1    | cytoplasmic FMR1 interacting protein 1                       | HGNC:13759 | 15q11.2      | -0.5603634 | 4.12574231 | -4.5089937 | 0.00021944 | 0.01310945 | 0.68155667 |
| ENSG000000131495.8_NDUFA2     | NDUFA2    | NADH:ubiquinone oxidoreductase subunit A2                    | HGNC:7685  | 5q31.3       | 0.71801803 | 6.3626251  | 4.51535212 | 0.00021623 | 0.01302154 | 0.67869019 |
| ENSG000000154783.11_FGD5      | FGD5      | FYVE, RhoGEF and PH domain containing 5                      | HGNC:19117 | 3p25.1       | -1.1111535 | 2.77436942 | -4.4868758 | 0.00023098 | 0.01342462 | 0.67764194 |
| ENSG000000182635.15_KLF7      | KLF7      | Kruppel like factor 7                                        | HGNC:6350  | 2q33.3       | -0.8256815 | 2.11175169 | -4.4835368 | 0.00023277 | 0.01342462 | 0.67697218 |
| ENSG000000133112.16_TPT1      | TPT1      | tumor protein, translationally-controlled 1                  | HGNC:12022 | 13q14.13     | 0.61189236 | 12.5000009 | 4.49134329 | 0.0002286  | 0.01342462 | 0.67414629 |
| ENSG000000186010.19_NDUFA13   | NDUFA13   | NADH:ubiquinone oxidoreductase subunit A13                   | HGNC:17194 | 19p13.11     | 0.69299824 | 7.65627585 | 4.51087554 | 0.00021848 | 0.01310463 | 0.66358432 |
| ENSG000000106605.11_BLVRA     | BLVRA     | biliverdin reductase A                                       | HGNC:1062  | 7p13         | 0.55859456 | 4.33507235 | 4.49047608 | 0.00022906 | 0.01342462 | 0.63720472 |
| ENSG000000186468.13_RPS23     | RPS23     | ribosomal protein S23                                        | HGNC:10410 | 5q14.2       | 0.6434127  | 8.81253437 | 4.48515914 | 0.0002319  | 0.01342462 | 0.62847899 |
| ENSG000000124172.10_ATP5F1E   | ATP5F1E   | ATP synthase F1 subunit epsilon                              | HGNC:838   | 20q13.32     | 0.74583274 | 6.98534474 | 4.48970153 | 0.00022947 | 0.01342462 | 0.62361802 |
| ENSG000000147677.11_EIF3H     | EIF3H     | eukaryotic translation initiation factor 3 subunit H         | HGNC:3273  | 8q23.3-q24.1 | 0.60375437 | 6.84574103 | 4.48973824 | 0.00022945 | 0.01342462 | 0.62332927 |
| ENSG000000161970.14_RPL26     | RPL26     | ribosomal protein L26                                        | HGNC:10327 | 17p13.1      | 0.62723723 | 8.08959698 | 4.4840949  | 0.00023247 | 0.01342462 | 0.61818029 |
| ENSG000000126785.13_RHOJ      | RHOJ      | ras homolog family member J                                  | HGNC:688   | 14q23.2      | -0.7867093 | 1.94020778 | -4.452772  | 0.00024998 | 0.01409187 | 0.61150584 |
| ENSG000000104147.9_OIP5       | OIP5      | Opa interacting protein 5                                    | HGNC:20300 | 15q15.1      | 1.07320192 | 1.8253737  | 4.46098209 | 0.00024527 | 0.01393088 | 0.6108181  |
| ENSG000000130584.11_ZBTB46    | ZBTB46    | zinc finger and BTB domain containing 46                     | HGNC:16094 | 20q13.33     | -0.797933  | 2.43564169 | -4.4475961 | 0.000253   | 0.01417053 | 0.60141928 |
| ENSG000000120278.16_PLEKHG1   | PLEKHG1   | pleckstrin homology and RhoGEF domain containing G1          | HGNC:20884 | 6q25.1       | -1.2123817 | 1.01510922 | -4.4798247 | 0.00023478 | 0.01348874 | 0.60109745 |
| ENSG000000170889.14_RPS9      | RPS9      | ribosomal protein S9                                         | HGNC:10442 | 19q13.42     | 0.60029323 | 8.60634746 | 4.46861201 | 0.00024097 | 0.01373866 | 0.58932992 |
| ENSG000000134824.14_FADS2     | FADS2     | fatty acid desaturase 2                                      | HGNC:3575  | 11q12.2      | -1.2366501 | 2.52671604 | -4.4410482 | 0.00025687 | 0.01421312 | 0.58606771 |
| ENSG000000198873.11_GRK5      | GRK5      | G protein-coupled receptor kinase 5                          | HGNC:4544  | 10q26.11     | -0.838556  | 3.03559203 | -4.4471419 | 0.00025326 | 0.01417053 | 0.58282806 |
| ENSG000000235316.1_DUSP8P5    | DUSP8P5   | dual specificity phosphatase 8 pseudogene 5                  | HGNC:45003 | 10q22.2      | -1.2068819 | 0.28935383 | -4.58763   | 0.00018292 | 0.01251377 | 0.57730374 |
| ENSG000000171056.8_SOX7       | SOX7      | SRV-box transcription factor 7                               | HGNC:18196 | 8p23.1       | -0.8966358 | 2.65969757 | -4.4320947 | 0.00026226 | 0.01428077 | 0.56438298 |
| ENSG000000145592.14_RPL37     | RPL37     | ribosomal protein L37                                        | HGNC:10347 | 5p13.1       | 0.68923406 | 8.16659485 | 4.45902211 | 0.00024638 | 0.01394152 | 0.56343675 |
| ENSG000000107798.18_LIPA      | LIPA      | lipase A, lysosomal acid type                                | HGNC:6617  | 10q23.31     | -0.6580675 | 3.1831711  | -4.4335271 | 0.00026139 | 0.01428077 | 0.54871717 |
| ENSG000000163909.8_HEYL       | HEYL      | hes related family bHLH transcription factor with YRPW motif | HGNC:4882  | 1p34.2       | -0.9201453 | 1.82870715 | -4.4233651 | 0.00026763 | 0.01443354 | 0.54658241 |
| ENSG000000142937.12_RPS8      | RPS8      | ribosomal protein S8                                         | HGNC:10441 | 1p34.1       | 0.54148908 | 8.75395855 | 4.4432828  | 0.00025554 | 0.01419201 | 0.5356052  |
| ENSG000000083845.9_RPS5       | RPS5      | ribosomal protein S5                                         | HGNC:10426 | 19q13.43     | 0.65206799 | 8.28038808 | 4.44438229 | 0.00025489 | 0.01419201 | 0.53214046 |
| ENSG000000147526.20_TACC1     | TACC1     | transforming acidic coiled-coil containing protein 1         | HGNC:11522 | 8p11.22      | -0.7134226 | 4.35249636 | -4.4373183 | 0.0002591  | 0.01423159 | 0.51729073 |
| ENSG000000128918.15_ALDH1A2   | ALDH1A2   | aldehyde dehydrogenase 1 family member A2                    | HGNC:15472 | 15q21.3      | -1.3568785 | 2.38411965 | -4.4002232 | 0.00028239 | 0.01501574 | 0.50131623 |
| ENSG000000047249.18_ATP6V1H   | ATP6V1H   | ATPase H+ transporting V1 subunit H                          | HGNC:18303 | 8q11.23      | 0.43039338 | 4.45438946 | 4.43032606 | 0.00026334 | 0.01428077 | 0.5        |

|                                |            |                                                             |            |              |            |            |            |            |            |            |
|--------------------------------|------------|-------------------------------------------------------------|------------|--------------|------------|------------|------------|------------|------------|------------|
| ENSG000000198435.4_NRARP       | NRARP      | NOTCH regulated ankyrin repeat protein                      | HGNC:33843 | 9q34.3       | -1.0380492 | 1.31107554 | -4.3308062 | 0.00033178 | 0.01620552 | 0.33175909 |
| ENSG000000147573.17_TRIM55     | TRIM55     | tripartite motif containing 55                              | HGNC:14215 | 8q13.1       | 0.64518224 | 4.76082868 | 4.35526279 | 0.00031346 | 0.01587955 | 0.33121963 |
| ENSG000000244187.8_TMEM141     | TMEM141    | transmembrane protein 141                                   | HGNC:28211 | 9q34.3       | 0.70611918 | 3.56758494 | 4.33650099 | 0.00032742 | 0.0161808  | 0.32877237 |
| ENSG000000151474.23_FRMD4A     | FRMD4A     | FERM domain containing 4A                                   | HGNC:25491 | 10p13        | -1.0746789 | 2.26353221 | -4.3122934 | 0.00034637 | 0.01652688 | 0.31594876 |
| ENSG000000120656.11_TAF12      | TAF12      | TATA-box binding protein associated factor 12               | HGNC:11545 | 1p35.3       | 0.65557711 | 3.06702174 | 4.3208802  | 0.00033952 | 0.01644922 | 0.3135353  |
| ENSG000000147408.14_CSGALNACT1 | CSGALNACT1 | chondroitin sulfate N-acetylgalactosaminyltransferase 1     | HGNC:24290 | 8p21.3       | -1.0719281 | 1.27321453 | -4.3201961 | 0.00034006 | 0.01644922 | 0.30629682 |
| ENSG000000128052.9_KDR         | KDR        | kinase insert domain receptor                               | HGNC:6307  | 4q12         | -0.9818847 | 2.49562932 | -4.3066059 | 0.00035097 | 0.01652688 | 0.29998831 |
| ENSG000000148303.17_RPL7A      | RPL7A      | ribosomal protein L7a                                       | HGNC:10364 | 9q34.2       | 0.48331387 | 8.96943186 | 4.3342774  | 0.00032912 | 0.0161808  | 0.29831681 |
| ENSG000000101445.10_PPP1R16B   | PPP1R16B   | protein phosphatase 1 regulatory subunit 16B                | HGNC:15850 | 20q11.23     | -1.30791   | 2.09313944 | -4.3017761 | 0.00035494 | 0.01652688 | 0.29522887 |
| ENSG000000111452.13_ADGRD1     | ADGRD1     | adhesion G protein-coupled receptor D1                      | HGNC:19893 | 12q24.33     | -1.2598737 | 2.40901538 | -4.2997152 | 0.00035664 | 0.01652688 | 0.28924187 |
| ENSG000000139679.15_LPAR6      | LPAR6      | lysophosphatidic acid receptor 6                            | HGNC:15520 | 13q14.2      | -0.7548395 | 1.93213284 | -4.2991608 | 0.0003571  | 0.01652688 | 0.28873027 |
| ENSG000000104689.9_TNFRSF10A   | TNFRSF10A  | TNF receptor superfamily member 10a                         | HGNC:11904 | 8p21.3       | -2.0020627 | -0.9537624 | -4.790264  | 0.00011462 | 0.01085309 | 0.28735707 |
| ENSG000000153904.20_DDAH1      | DDAH1      | dimethylarginine dimethylaminohydrolase 1                   | HGNC:2715  | 1p22.3       | 0.57076853 | 5.22875213 | 4.33449303 | 0.00032895 | 0.0161808  | 0.27994837 |
| ENSG000000109084.14_TMEM97     | TMEM97     | transmembrane protein 97                                    | HGNC:28106 | 17q11.2      | 0.79018496 | 2.45121863 | 4.29527119 | 0.00036034 | 0.01660329 | 0.27906402 |
| ENSG000000125971.16_DYNLRB1    | DYNLRB1    | dynein light chain roadblock-type 1                         | HGNC:15468 | 20q11.22     | 0.49383125 | 5.46498513 | 4.33286782 | 0.0003302  | 0.0161808  | 0.27501579 |
| ENSG000000131634.14_TMEM204    | TMEM204    | transmembrane protein 204                                   | HGNC:14158 | 16p13.3      | -0.6800601 | 3.02933642 | -4.3009726 | 0.0003556  | 0.01652688 | 0.26432756 |
| ENSG000000227671.4_AL390728.4  | AL390728.4 |                                                             |            |              | -1.100099  | 0.6232127  | -4.3357721 | 0.00032798 | 0.0161808  | 0.26299237 |
| ENSG000000108175.17_ZMIZ1      | ZMIZ1      | zinc finger MIZ-type containing 1                           | HGNC:16493 | 10q22.3      | -0.8185506 | 4.36072785 | -4.3180699 | 0.00034175 | 0.01647753 | 0.25567661 |
| ENSG000000172716.16_SLFN11     | SLFN11     | schlafen family member 11                                   | HGNC:26633 | 17q12        | -0.7436305 | 2.21789301 | -4.278263  | 0.00037487 | 0.01701414 | 0.24401701 |
| ENSG000000152583.12_SPARCL1    | SPARCL1    | SPARC like 1                                                | HGNC:11220 | 4q22.1       | -0.607121  | 6.83576346 | -4.3145154 | 0.00034458 | 0.01652688 | 0.23672203 |
| ENSG000000066735.14_KIF26A     | KIF26A     | kinesin family member 26A                                   | HGNC:20226 | 14q32.33     | -1.349662  | 2.14846644 | -4.2734871 | 0.00037906 | 0.01652688 | 0.23559125 |
| ENSG000000160799.11_CDC12      | CDC12      | coiled-coil domain containing 12                            | HGNC:28332 | 3p21.31      | 0.65398246 | 4.42838641 | 4.30760691 | 0.00035016 | 0.01652688 | 0.23315177 |
| ENSG000000160111.13_CPAMD8     | CPAMD8     | C3 and P2P like alpha-2-macroglobulin domain containing 8   | HGNC:23228 | 19p13.11     | -1.2869074 | 1.81274257 | -4.2709425 | 0.00038131 | 0.01706027 | 0.23044703 |
| ENSG000000111481.10_COP21      | COP21      | COPI coat complex subunit zeta 1                            | HGNC:2243  | 12q13.13     | 0.45519979 | 5.72134755 | 4.31266791 | 0.00034607 | 0.01652688 | 0.22984164 |
| ENSG000000132963.8_POMP        | POMP       | proteasome maturation protein                               | HGNC:20330 | 13q12.3      | 0.58240466 | 6.0427084  | 4.31028453 | 0.00034799 | 0.01652688 | 0.22467306 |
| ENSG000000236552.2_RPL13AP5    | RPL13AP5   | ribosomal protein L13a pseudogene 5                         | HGNC:23736 | 10q24.1      | 0.69483631 | 2.1601344  | 4.26716117 | 0.00038467 | 0.01706027 | 0.22250603 |
| ENSG000000204822.7_MRPL53      | MRPL53     | mitochondrial ribosomal protein L53                         | HGNC:16684 | 2p13.1       | 0.6126103  | 5.11731829 | 4.30524096 | 0.00035209 | 0.01652688 | 0.2163769  |
| ENSG000000134817.10_APLNR      | APLNR      | apelin receptor                                             | HGNC:339   | 11q12.1      | -1.0881279 | 3.72118849 | -4.2869608 | 0.00036737 | 0.0167613  | 0.21186581 |
| ENSG000000204291.11_COL15A1    | COL15A1    | collagen type XV alpha 1 chain                              | HGNC:2192  | 9q22.33      | -1.3650702 | 5.17222701 | -4.3014596 | 0.0003552  | 0.01652688 | 0.20948228 |
| ENSG000000188846.13_RPL14      | RPL14      | ribosomal protein L14                                       | HGNC:10305 | 3p22.1       | 0.58333283 | 8.48036282 | 4.29452815 | 0.00036097 | 0.01660329 | 0.20393582 |
| ENSG000000139514.13_SLC7A1     | SLC7A1     | solute carrier family 7 member 1                            | HGNC:11057 | 13q12.3      | -1.389991  | 0.84363348 | -4.3052673 | 0.00035207 | 0.01652688 | 0.20178201 |
| ENSG00000020181.17_ADGRA2      | ADGRA2     | adhesion G protein-coupled receptor A2                      | HGNC:17849 | 8p11.23      | -1.5349038 | 3.10669918 | -4.2666867 | 0.0003851  | 0.01706027 | 0.19400229 |
| ENSG000000275832.5_ARHGAP23    | ARHGAP23   | Rho GTPase activating protein 23                            | HGNC:29293 | 17q12        | -1.072273  | 3.52563627 | -4.2667928 | 0.000385   | 0.01706027 | 0.17659573 |
| ENSG00000070614.15_NDST1       | NDST1      | N-deacetylase and N-sulfotransferase 1                      | HGNC:7680  | 5q33.1       | -0.6695501 | 5.11939551 | -4.286512  | 0.00036775 | 0.0167613  | 0.17489037 |
| ENSG000000042062.12_RIPOR3     | RIPOR3     | RIPOR family member 3                                       | HGNC:16168 | 20q13.13     | -0.88846   | 2.46875947 | -4.2478051 | 0.00040238 | 0.01738819 | 0.17341649 |
| ENSG000000109436.8_TBC1D9      | TBC1D9     | TBC1 domain family member 9                                 | HGNC:21710 | 4q31.21      | -1.050656  | 1.12970764 | -4.2547823 | 0.00039591 | 0.01730789 | 0.15991911 |
| ENSG000000105372.7_RPS19       | RPS19      | ribosomal protein S19                                       | HGNC:10402 | 19q13.2      | 0.62027208 | 7.89203525 | 4.27746342 | 0.00037557 | 0.01701414 | 0.15976775 |
| ENSG000000170310.15_STX8       | STX8       | syntaxin 8                                                  | HGNC:11443 | 17p13.1      | 0.62150983 | 3.78316251 | 4.26457846 | 0.00038699 | 0.01706027 | 0.15935904 |
| ENSG000000151690.15_MFSD6      | MFSD6      | major facilitator superfamily domain containing 6           | HGNC:24711 | 2q32.2       | -1.1002797 | 1.39578556 | -4.2435504 | 0.00040638 | 0.01751061 | 0.1592643  |
| ENSG000000180447.7_GAS1        | GAS1       | growth arrest specific 1                                    | HGNC:4165  | 9q21.33      | -1.1514423 | 3.04012333 | -4.248632  | 0.00040161 | 0.01738819 | 0.15684628 |
| ENSG000000105640.13_RPL18A     | RPL18A     | ribosomal protein L18a                                      | HGNC:10311 | 19p13.11     | 0.5641445  | 9.01148117 | 4.26763085 | 0.00038425 | 0.01706027 | 0.15157202 |
| ENSG000000127954.12_STEAP4     | STEAP4     | STEAP4 metalloenducase                                      | HGNC:21923 | 7p21.12      | -0.6322691 | 3.74371563 | -4.2634955 | 0.00038797 | 0.01706027 | 0.15089143 |
| ENSG000000198838.13_RYR3       | RYR3       | ryanodine receptor 3                                        | HGNC:10485 | 15q13.3-q14  | 1.46376521 | 5.44241695 | 4.27369496 | 0.00037888 | 0.01706027 | 0.14736784 |
| ENSG000000065308.5_TRAM2       | TRAM2      | translocation associated membrane protein 2                 | HGNC:16855 | 6p12.2       | -0.7882316 | 2.63893432 | -4.2364642 | 0.00041313 | 0.01760869 | 0.14377827 |
| ENSG000000135390.19_ATP5MC2    | ATP5MC2    | ATP synthase membrane subunit c locus 2                     | HGNC:842   | 12q13.13     | 0.54752033 | 8.0205801  | 4.26586733 | 0.00038583 | 0.01706027 | 0.13545261 |
| ENSG000000253276.3_CDC71L      | CDC71L     | coiled-coil domain containing 71 like                       | HGNC:26685 | 7q22.3       | -0.8923726 | 1.4055809  | -4.224472  | 0.00042482 | 0.01784352 | 0.11830809 |
| ENSG000000164032.12_H2AFZ      | H2AFZ      | H2A.Z variant histone 1                                     | HGNC:4741  | 4q23         | 0.57378539 | 5.10085104 | 4.25774863 | 0.00039319 | 0.01723919 | 0.11103975 |
| ENSG000000128917.8_DLL4        | DLL4       | delta like canonical Notch ligand 4                         | HGNC:2910  | 15q15.1      | -1.0606729 | 1.7706217  | -4.2147201 | 0.00043456 | 0.01794675 | 0.10990848 |
| ENSG000000061918.13_GUCY1B1    | GUCY1B1    | guanylate cyclase 1 soluble subunit beta 1                  | HGNC:4687  | 4q32.1       | -0.8796797 | 1.52313609 | -4.2098407 | 0.00043952 | 0.01794675 | 0.09682198 |
| ENSG000000130508.11_PXDN       | PXDN       | peroxidasin                                                 | HGNC:14966 | 2p25.3       | -1.2228701 | 3.20880171 | -4.2255005 | 0.0004238  | 0.01784352 | 0.09534636 |
| ENSG000000139567.12_ACVRL1     | ACVRL1     | activin A receptor like type 1                              | HGNC:175   | 12q13.13     | -0.7016726 | 3.86871725 | -4.2368427 | 0.00041277 | 0.01760869 | 0.09236769 |
| ENSG000000150316.12_CWC15      | CWC15      | CWC15 spliceosome associated protein homolog                | HGNC:26939 | 11q21        | 0.58408902 | 5.63313081 | 4.24818451 | 0.00040203 | 0.01738819 | 0.08728158 |
| ENSG000000104728.16_ARHGEF10   | ARHGEF10   | Rho guanine nucleotide exchange factor 10                   | HGNC:14103 | 8q23.3       | -0.8713322 | 2.34376989 | -4.2056941 | 0.00044378 | 0.01794675 | 0.08553554 |
| ENSG000000260442.5_ATP2A1-AS1  | ATP2A1-AS1 | ATP2A1 antisense RNA 1                                      | HGNC:51370 | 16p11.2      | 0.9271868  | 1.85871498 | 4.20261628 | 0.00044697 | 0.01794675 | 0.08415974 |
| ENSG000000136810.13_TXN        | TXN        | thioredoxin                                                 | HGNC:12435 | 9q31.3       | 0.71886309 | 3.9781328  | 4.2322964  | 0.00041716 | 0.01768995 | 0.08215093 |
| ENSG000000105185.12_PDCD5      | PDCD5      | programmed cell death 5                                     | HGNC:8764  | 19q13.11     | 0.61749946 | 4.91180722 | 4.24211448 | 0.00040774 | 0.01751883 | 0.07896978 |
| ENSG000000166068.13_SPRED1     | SPRED1     | sprouty related EVH1 domain containing 1                    | HGNC:20249 | 15q14        | -0.7516029 | 1.5638804  | -4.1969325 | 0.00045292 | 0.01806256 | 0.07081501 |
| ENSG000000136295.15_TTYH3      | TTYH3      | tweety family member 3                                      | HGNC:22222 | 7p22.3       | -1.6670023 | 1.87263193 | -4.1921224 | 0.00045802 | 0.01810076 | 0.0629256  |
| ENSG000000171863.14_RPS7       | RPS7       | ribosomal protein S7                                        | HGNC:10440 | 2p25.3       | 0.55298606 | 7.47981792 | 4.23152091 | 0.00041791 | 0.01768995 | 0.05512635 |
| ENSG000000147403.16_RPL10      | RPL10      | ribosomal protein L10                                       | HGNC:10298 | Xq28         | 0.51093185 | 9.93367236 | 4.21665011 | 0.00043262 | 0.01794675 | 0.05174183 |
| ENSG000000111961.18_SASH1      | SASH1      | SAM and SH3 domain containing 1                             | HGNC:19182 | 6q24.3-q25.1 | -0.760862  | 3.56118512 | -4.2119517 | 0.00043737 | 0.01794675 | 0.05066363 |
| ENSG000000124562.10_SNRPC      | SNRPC      | small nuclear ribonucleoprotein polypeptide C               | HGNC:11157 | 6p21.31      | 0.47366271 | 5.1800765  | 4.2306043  | 0.0004188  | 0.01768995 | 0.05024551 |
| ENSG000000131473.17_ACLY       | ACLY       | ATP citrate lyase                                           | HGNC:115   | 17q21.2      | -0.6188841 | 3.56162212 | -4.2064858 | 0.00044297 | 0.01794675 | 0.03736519 |
| ENSG000000172456.17_FGGY       | FGGY       | FGGY carbohydrate kinase domain containing                  | HGNC:25610 | 1p32.1       | 0.94927828 | 4.68252951 | 4.22023898 | 0.00042902 | 0.01791966 | 0.03734203 |
| ENSG000000205544.4_TMEM256     | TMEM256    | transmembrane protein 256                                   | HGNC:28618 | 17p13.1      | 0.74944835 | 3.05012535 | 4.19147504 | 0.00045871 | 0.01810076 | 0.03709716 |
| ENSG000000185361.9_TNFAIP8L1   | TNFAIP8L1  | TNF alpha induced protein 8 like 1                          | HGNC:28279 | 19p13.3      | -0.9072875 | 2.33142885 | -4.1804916 | 0.00047058 | 0.01828056 | 0.03613785 |
| ENSG000000129559.13_NEDD8      | NEDD8      | NEDD8 ubiquitin like modifier                               | HGNC:7732  | 14q12        | 0.59329487 | 6.04584142 | 4.22054402 | 0.00042872 | 0.01791966 | 0.02597256 |
| ENSG000000155849.15_ELMO1      | ELMO1      | engulfment and cell motility 1                              | HGNC:16286 | 7p14.2-p14.1 | -1.1001877 | 1.0543172  | -4.1893912 | 0.00046093 | 0.01811669 | 0.02317067 |
| ENSG000000171490.13_RSL1D1     | RSL1D1     | ribosomal L1 domain containing 1                            | HGNC:24534 | 16p13.13     | 0.56848874 | 6.68295224 | 4.21675684 | 0.00043251 | 0.01794675 | 0.01882447 |
| ENSG000000167178.16_ISLR2      | ISLR2      | immunoglobulin superfamily containing leucine rich repeat 2 | HGNC:29286 | 15q24.1      | -1.6010982 | 0.69371167 | -4.2155503 | 0.00043372 | 0.01794675 | 0.01697554 |
| ENSG000000158270.12_COLEC12    | COLEC12    | collectin subfamily member 12                               | HGNC:16016 | 18p11.32     | -1.2411941 | 2.30029897 | -4.1706403 | 0.00048149 | 0.01858945 | 0.01454811 |
| ENSG000000109686.18_SH3D19     | SH3D19     | SH3 domain containing 19                                    | HGNC:30418 | 4q31.3       | -0.6584393 | 3.96683585 | -4.2044516 | 0.00044507 | 0.01794675 | 0.01436718 |
| ENSG000000181924.7_COA4        | COA4       | cytochrome c oxidase assembly factor 4 homolog              | HGNC:24604 | 11q13.4      | 0.53856797 | 4.24653804 | 4.20641291 | 0.00044304 | 0.01794675 | 0.01413232 |
| ENSG000000179958.8_DCTPP1      | DCTPP1     | dCTP pyrophosphatase 1                                      | HGNC:28777 | 16p11.2      | 0.49057304 | 4.60434641 | 4.20900017 | 0.00044038 | 0.01794675 | 0.01024296 |
| ENSG000000257303.1_AC073896.2  | AC073896.2 |                                                             |            |              | 1.07102686 | 1.2018481  | 4.18518384 | 0.00046547 | 0.01812907 | 0.00835371 |
| ENSG000000104967.7_NOVA2       | NOVA2      | NOVA alternative splicing regulator 2                       | HGNC:7887  |              |            |            |            |            |            |            |

|                                |            |                                                              |            |               |            |            |            |            |            |            |
|--------------------------------|------------|--------------------------------------------------------------|------------|---------------|------------|------------|------------|------------|------------|------------|
| ENSG000000172428.11_COPS9      | COPS9      | COP9 signalosome subunit 9                                   | HGNC:21314 | 2q37.3        | 0.71127276 | 5.50144549 | 4.14690356 | 0.00050882 | 0.01912776 | -0.1364457 |
| ENSG000000100387.8_RBX1        | RBX1       | ring-box 1                                                   | HGNC:9928  | 22q13.2       | 0.57667202 | 5.51429925 | 4.14678213 | 0.00050897 | 0.01912776 | -0.136925  |
| ENSG000000181104.7_F2R         | F2R        | coagulation factor II thrombin receptor                      | HGNC:3537  | 5q13.3        | -1.1769317 | 1.13021806 | -4.1023391 | 0.00056442 | 0.02010329 | -0.1406222 |
| ENSG00000074201.8_CLNS1A       | CLNS1A     | chloride nucleotide-sensitive channel 1A                     | HGNC:2080  | 11q14.1       | 0.46774956 | 5.0728839  | 4.14247783 | 0.00051409 | 0.01922393 | -0.1439162 |
| ENSG000000157554.19_ERG        | ERG        | ETS transcription factor ERG                                 | HGNC:3446  | 21q22.2       | -0.8758433 | 2.40418892 | -4.0950813 | 0.00057403 | 0.02034903 | -0.1498974 |
| ENSG000000164405.11_UQCRCQ     | UQCRCQ     | ubiquinol-cytochrome c reductase complex III subunit VII     | HGNC:29594 | 5q31.1        | 0.68236164 | 7.94013199 | 4.13623556 | 0.00052161 | 0.01936034 | -0.1518037 |
| ENSG000000277258.5_PCGF2       | PCGF2      | polycomb group ring finger 2                                 | HGNC:12929 | 17q12         | -1.0381289 | 1.53558955 | -4.0874586 | 0.00058431 | 0.02051241 | -0.1577203 |
| ENSG000000184005.11_ST6GALNAC3 | ST6GALNAC3 | ST6 N-acetylgalactosaminide alpha-2,6-sialyltransferase 3    | HGNC:19343 | 1p31.1        | -1.1263484 | -0.1780556 | -4.1928509 | 0.00045724 | 0.01810076 | -0.1788083 |
| ENSG000000136930.13_PSMB7      | PSMB7      | proteasome 20S subunit beta 7                                | HGNC:9544  | 9q33.3        | 0.59889243 | 6.0956988  | 4.12443104 | 0.00053614 | 0.01955578 | -0.1867826 |
| ENSG000000130332.15_LSM7       | LSM7       | LSM7 homolog, U6 small nuclear RNA and mRNA degradation      | HGNC:20470 | 19p13.3       | 0.59547523 | 3.85263984 | 4.1055487  | 0.00056022 | 0.02004895 | -0.1919864 |
| ENSG000000152784.15_PRDM8      | PRDM8      | PR/SET domain 8                                              | HGNC:13993 | 4q21.21       | -1.4568035 | 0.14779763 | -4.1446021 | 0.00051156 | 0.01917697 | -0.1945386 |
| ENSG000000099795.7_NDUFB7      | NDUFB7     | NADH:ubiquinone oxidoreductase subunit B7                    | HGNC:7702  | 19p13.12      | 0.54766004 | 7.05271932 | 4.11976959 | 0.00054199 | 0.01967814 | -0.1945932 |
| ENSG000000145358.6_DDIT4L      | DDIT4L     | DNA damage inducible transcript 4 like                       | HGNC:30555 | 4q24          | 1.05661411 | 7.31286059 | 4.11853683 | 0.00054354 | 0.019687   | -0.1961959 |
| ENSG000000132669.13_RIN2       | RIN2       | Ras and Rab interactor 2                                     | HGNC:18750 | 20p11.23      | -0.5943164 | 3.09285351 | -4.086173  | 0.00058606 | 0.02051241 | -0.2005135 |
| ENSG000000138594.14_TM0D3      | TM0D3      | tropomodulin 3                                               | HGNC:11873 | 15q21.2       | -0.7424194 | 2.63260092 | -4.0739268 | 0.000603   | 0.02073517 | -0.2028698 |
| ENSG000000134780.10_DAGLA      | DAGLA      | diacylglycerol lipase alpha                                  | HGNC:1165  | 11q12.2       | -1.0449516 | 1.44357778 | -4.0652213 | 0.00061534 | 0.02092107 | -0.2105153 |
| ENSG000000173269.14_MMRN2      | MMRN2      | multimerin 2                                                 | HGNC:19888 | 10q23.2       | -0.8320575 | 4.18402423 | -4.1026411 | 0.00056402 | 0.02010329 | -0.2150234 |
| ENSG000000132676.16_DAP3       | DAP3       | death associated protein 3                                   | HGNC:2673  | 1q22          | 0.538129   | 5.53926334 | 4.11154358 | 0.00055246 | 0.01986603 | -0.2151698 |
| ENSG000000120708.17_TGFB1      | TGFB1      | transforming growth factor beta induced                      | HGNC:11771 | 5q31.1        | -1.1747404 | 3.83365905 | -4.0961596 | 0.0005726  | 0.02034614 | -0.2155149 |
| ENSG000000272674.3_PCDHB16     | PCDHB16    | protocadherin beta 16                                        | HGNC:14546 | 5q31.3        | -1.4489794 | -0.505682  | -4.2362335 | 0.00041336 | 0.01760869 | -0.2359565 |
| ENSG000000100575.14_TIMM9      | TIMM9      | translocase of inner mitochondrial membrane 9                | HGNC:11819 | 14q23.1       | 0.5669893  | 3.57540633 | 4.07873274 | 0.00059629 | 0.02068361 | -0.2375171 |
| ENSG000000180357.9_ZNF609      | ZNF609     | zinc finger protein 609                                      | HGNC:29003 | 15q22.1       | -0.486073  | 3.61047055 | -4.0819455 | 0.00059185 | 0.02063911 | -0.2378523 |
| ENSG000000137478.15_FCHSD2     | FCHSD2     | FCH and double SH3 domains 2                                 | HGNC:29114 | 11q13.4       | -0.6186894 | 2.60924965 | -4.0567735 | 0.00062756 | 0.02109913 | -0.2422666 |
| ENSG000000133997.11_MED6       | MED6       | mediator complex subunit 6                                   | HGNC:19970 | 14q24.2       | 0.52468866 | 3.40372691 | 4.07314684 | 0.0006041  | 0.02073517 | -0.2430619 |
| ENSG000000176731.12_C8orf59    | C8orf59    | ribosomal biogenesis factor                                  | HGNC:32235 | 8q21.2        | 0.58929594 | 3.78316433 | 4.07936395 | 0.00059542 | 0.02068361 | -0.2467099 |
| ENSG000000124496.12_TRERF1     | TRERF1     | transcriptional regulating factor 1                          | HGNC:18273 | 6p21.1        | -1.4546688 | 0.27316858 | -4.131333  | 0.00055276 | 0.01939047 | -0.2498416 |
| ENSG000000130589.16_HELZ2      | HELZ2      | helicase with zinc finger 2                                  | HGNC:30021 | 20q13.33      | -1.5420487 | 2.26761398 | -4.0428745 | 0.00064819 | 0.02136165 | -0.250073  |
| ENSG000000101470.10_TNNC2      | TNNC2      | tropoin C2, fast skeletal type                               | HGNC:11944 | 20q13.12      | 0.92886015 | 12.7816461 | 4.06428683 | 0.00061668 | 0.02092107 | -0.2527358 |
| ENSG000000179583.19_CIIA       | IIA        | class II major histocompatibility complex transactivator     | HGNC:7067  | 16p13.13      | -0.8228285 | 3.1917026  | -4.05953   | 0.00062354 | 0.02105866 | -0.2561641 |
| ENSG000000177700.6_POLR2L      | POLR2L     | RNA polymerase II subunit L                                  | HGNC:9199  | 11p15.5       | 0.59617503 | 6.00031228 | 4.09306127 | 0.00057674 | 0.02039669 | -0.2562981 |
| ENSG000000100804.18_PSMB5      | PSMB5      | proteasome 20S subunit beta 5                                | HGNC:9542  | 14q11.2       | 0.4891738  | 6.76621451 | 4.09146634 | 0.00057888 | 0.02042436 | -0.25819   |
| ENSG000000170290.4_SLN         | SLN        | sarcolipin                                                   | HGNC:11089 | 11q22.3       | 0.77985856 | 11.0800749 | 4.06779805 | 0.00061166 | 0.02087054 | -0.2622473 |
| ENSG000000126603.8_GLI52       | GLI52      | GLI5 family zinc finger 2                                    | HGNC:29450 | 16p13.3       | -1.2752063 | 1.57270932 | -4.0330892 | 0.00066312 | 0.02161611 | -0.2701323 |
| ENSG000000089289.16_IGBP1      | IGBP1      | immunoglobulin binding protein 1                             | HGNC:5461  | Xq13.1        | 0.62513563 | 5.65015986 | 4.08559226 | 0.00058685 | 0.02051241 | -0.2726748 |
| ENSG000000134825.15_TM0M258    | TM0M258    | transmembrane protein 258                                    | HGNC:1164  | 11q12.2       | 0.58578732 | 4.78375096 | 4.07803238 | 0.00059727 | 0.02068361 | -0.2816811 |
| ENSG000000125445.11_MRPS7      | MRPS7      | mitochondrial ribosomal protein S7                           | HGNC:14499 | 17q25.1       | 0.49382264 | 6.34782254 | 4.07668194 | 0.00059915 | 0.02070091 | -0.2920113 |
| ENSG000000127540.12_UQCRC11    | UQCRC11    | ubiquinol-cytochrome c reductase, complex III subunit XI     | HGNC:30862 | 19p13.3       | 0.65059793 | 8.0112147  | 4.0711729  | 0.00060688 | 0.02077651 | -0.2947264 |
| ENSG000000167863.12_ATP5PD     | ATP5PD     | ATP synthase peripheral stalk subunit d                      | HGNC:845   | 17q25.1       | 0.62479606 | 7.40643363 | 4.073011   | 0.00060429 | 0.02073517 | -0.2958302 |
| ENSG000000102870.6_ZNF629      | ZNF629     | zinc finger protein 629                                      | HGNC:29008 | 16p11.2       | -0.6506467 | 3.80597576 | -4.0527661 | 0.00063344 | 0.02115452 | -0.3035945 |
| ENSG000000265681.7_RPL17       | RPL17      | ribosomal protein L17                                        | HGNC:10307 | 18q21.1       | 0.55246598 | 7.53744378 | 4.0672749  | 0.00061241 | 0.02087054 | -0.3076833 |
| ENSG000000219410.6_AC125494.1  | AC125494.1 |                                                              |            |               | 0.83610184 | 1.98670474 | 4.01190894 | 0.00069662 | 0.02235191 | -0.3110755 |
| ENSG000000058668.14_ATP2B4     | ATP2B4     | ATPase plasma membrane Ca2+ transporting 4                   | HGNC:817   | 1q32.1        | -0.7169621 | 4.48670908 | -4.0630752 | 0.00061842 | 0.02093278 | -0.3114393 |
| ENSG000000162618.14_ADGRL4     | ADGRL4     | adhesion G protein-coupled receptor L4                       | HGNC:20822 | 1p31.1        | -0.7865445 | 2.71841074 | -4.020113  | 0.00068344 | 0.02208672 | -0.3238127 |
| ENSG000000107736.20_CD0H23     | CD0H23     | cadherin related 23                                          | HGNC:13733 | 10q22.1       | -1.1189847 | 2.46376217 | -4.0121591 | 0.00069621 | 0.02235191 | -0.3288465 |
| ENSG000000124614.15_RPS10      | RPS10      | ribosomal protein S10                                        | HGNC:10383 | 6p21.31       | 0.56072878 | 7.87929205 | 4.05514948 | 0.00062993 | 0.02113164 | -0.3316654 |
| ENSG000000175061.17_SNHG29     | SNHG29     | small nucleolar RNA host gene 29                             | HGNC:28619 | 17p11.2       | 0.44314174 | 5.56902367 | 4.05789596 | 0.00062592 | 0.02109138 | -0.3339472 |
| ENSG000000254093.9_PINX1       | PINX1      | PIN2 (TERF1) interacting telomerase inhibitor 1              | HGNC:30046 | 8p23.1        | 0.63900958 | 1.85758612 | 3.99763002 | 0.00072015 | 0.0228785  | -0.3401531 |
| ENSG000000082014.16_SMARCD3    | SMARCD3    | SWI/SNF related, matrix associated, actin dependent regulato | HGNC:11108 | 7q36.1        | 0.44287466 | 6.87054379 | 4.05139724 | 0.00063546 | 0.02117485 | -0.3466756 |
| ENSG000000008249.12_SER0AD4    | SER0AD4    | SERTA domain containing 4                                    | HGNC:25236 | 13q32.2       | -1.140684  | -0.5244348 | -4.1609669 | 0.00049245 | 0.01874165 | -0.3471559 |
| ENSG000000126878.13_AIF1L      | AIF1L      | allograft inflammatory factor 1 like                         | HGNC:28904 | 9q34.12-q34.1 | -0.671172  | 3.71801947 | -4.0310349 | 0.00066629 | 0.02162567 | -0.3555531 |
| ENSG000000165916.8_PSMC3       | PSMC3      | proteasome 26S subunit, ATPase 3                             | HGNC:9549  | 11p11.2       | 0.59948166 | 7.04897901 | 4.04579688 | 0.00064379 | 0.02135769 | -0.3581385 |
| ENSG000000115159.16_GPD2       | GPD2       | glycerol-3-phosphate dehydrogenase 2                         | HGNC:4456  | 2q24.1        | 0.79977078 | 5.07085504 | 4.04457433 | 0.00064563 | 0.02136165 | -0.3594045 |
| ENSG000000198918.8_RPL39       | RPL39      | ribosomal protein L39                                        | HGNC:10350 | Xq24.1        | 0.64841671 | 7.74279187 | 4.04308613 | 0.00064787 | 0.02136165 | -0.3595031 |
| ENSG000000152147.11_GEMIN6     | GEMIN6     | gem nuclear organelle associated protein 6                   | HGNC:20044 | 2p22.1        | 0.6330269  | 1.93426146 | 3.98148967 | 0.00074771 | 0.02332442 | -0.3744166 |
| ENSG000000062582.14_MRPS24     | MRPS24     | mitochondrial ribosomal protein S24                          | HGNC:14510 | 7p13          | 0.49580821 | 6.56411316 | 4.03680829 | 0.0006574  | 0.02161611 | -0.3797354 |
| ENSG000000184254.17_ALDH1A3    | ALDH1A3    | aldehyde dehydrogenase 1 family member A3                    | HGNC:409   | 15q26.3       | -1.2792504 | 1.91451493 | -3.9782404 | 0.00075338 | 0.02383702 | -0.3822624 |
| ENSG000000167548.15_KMT2D      | KMT2D      | lysine methyltransferase 2D                                  | HGNC:7133  | 12q13.12      | -0.7303856 | 6.35808331 | -4.0343826 | 0.00066112 | 0.02161611 | -0.3850606 |
| ENSG000000198682.13_PAPSS2     | PAPSS2     | 3'-phosphoadenosine 5'-phosphosulfate synthase 2             | HGNC:8604  | 10q23.2-q23.3 | -1.1637936 | 1.12777464 | -3.9803231 | 0.00074974 | 0.02332442 | -0.3857259 |
| ENSG000000134198.10_TSPAN2     | TSPAN2     | tetraspanin 2                                                | HGNC:20659 | 1p13.2        | -1.0540121 | 0.16974915 | -4.0319323 | 0.0006649  | 0.02162567 | -0.3862272 |
| ENSG000000008018.9_PSMB1       | PSMB1      | proteasome 20S subunit beta 1                                | HGNC:9537  | 6q27          | 0.60537461 | 6.45981498 | 4.03351439 | 0.00066246 | 0.02161611 | -0.3872813 |
| ENSG000000242485.6_MRPL20      | MRPL20     | mitochondrial ribosomal protein L20                          | HGNC:14478 | 1p36.33       | 0.57720149 | 6.00799804 | 4.03328575 | 0.00066281 | 0.02161611 | -0.3885267 |
| ENSG000000129007.14_CALML4     | CALML4     | calmodulin like 4                                            | HGNC:18445 | 15q23         | 1.80813007 | 1.25057338 | 3.99599838 | 0.00072289 | 0.02291697 | -0.3896912 |
| ENSG000000131323.14_T0RAF3     | T0RAF3     | TNF receptor associated factor 3                             | HGNC:12033 | 14q32.32      | -0.5967044 | 2.61940415 | -3.9803771 | 0.00074965 | 0.02332442 | -0.4071824 |
| ENSG000000260465.1_AC018557.1  | AC018557.1 |                                                              |            |               | 0.74834516 | 3.13970063 | 3.98879726 | 0.0007351  | 0.02310876 | -0.4089496 |
| ENSG000000232388.4_SMIM26      | SMIM26     | small integral membrane protein 26                           | HGNC:43430 | 20p11.23      | 0.61868753 | 5.51608957 | 4.02135186 | 0.00068148 | 0.02207071 | -0.4144899 |
| ENSG000000167515.10_T0RAPP2C1L | T0RAPP2C1L | trafficking protein particle complex 2 like                  | HGNC:30887 | 16q24.3       | 0.53107801 | 4.53730094 | 4.01129495 | 0.00069761 | 0.02235191 | -0.4231881 |
| ENSG000000158769.18_F11R       | F11R       | F11 receptor                                                 | HGNC:14685 | 1q23.3        | -0.8998599 | 2.48838143 | -3.9650246 | 0.00077691 | 0.02382356 | -0.4266826 |
| ENSG000000135111.16_TBX3       | TBX3       | T-box transcription factor 3                                 | HGNC:11602 | 12q24.21      | -0.8081531 | 2.98990987 | -3.9750882 | 0.00075893 | 0.02346419 | -0.4365503 |
| ENSG000000104979.9_C19orf53    | C19orf53   | chromosome 19 open reading frame 53                          | HGNC:24991 | 19p13.13      | 0.56635367 | 5.66467479 | 4.01144645 | 0.00069737 | 0.02235191 | -0.4367312 |
| ENSG000000160948.14_VPS28      | VPS28      | VPS28 subunit of ESCRT-I                                     | HGNC:18178 | 8q24.3        | 0.48031373 | 5.82162155 | 4.01013987 | 0.00069949 | 0.02236428 | -0.4398113 |
| ENSG000000279598.1_AC009948.4  | AC009948.4 |                                                              |            |               | 1.87348472 | -0.9180189 | 4.29227017 | 0.00036287 | 0.01663961 | -0.4423187 |
| ENSG000000214176.9_PLEKHM1P1   | PLEKHM1P1  | pleckstrin homology and RUN domain containing M1 pseudog     | HGNC:35411 | 17q24.1       | -0.6652108 | 2.57325447 | -3.9586732 | 0.00078847 | 0.02402951 | -0.4464109 |
| ENSG000000082068.8_WDR70       | WDR70      | WD repeat domain 70                                          | HGNC:25495 | 5p13.2        | 0.5316267  | 3.55888967 | 3.97739123 | 0.00075487 | 0.02338702 | -0.462503  |
| ENSG000000126883.17_NUP214     | NUP214     | nucleoporin 214                                              | HGNC:8064  | 3q4.13        | -0.450084  | 4.18752535 | -3.9893834 | 0.0007341  | 0.02310876 | -0.4632372 |
| ENSG000000132432.14_SEC61G     | SEC61G     | SEC61 translocon subunit gamma                               | HGNC:18277 | 7p11.2        | 0.5921633  | 4.55073228 | 3.99219878 | 0.00072931 | 0.02303961 | -0.4665669 |
| ENSG000000124593.16_AL365205.1 | AL365205.1 |                                                              |            |               | -0.7782701 | 2.10183379 | -3.9380689 | 0.00       |            |            |

|                               |            |                                                             |            |              |            |            |            |            |            |            |
|-------------------------------|------------|-------------------------------------------------------------|------------|--------------|------------|------------|------------|------------|------------|------------|
| ENSG000000204248.10_COL11A2   | COL11A2    | collagen type XI alpha 2 chain                              | HGNC:2187  | 6p21.32      | -1.1183805 | 1.91221353 | -3.8724136 | 0.00096363 | 0.02697073 | -0.601482  |
| ENSG000000219626.9_FAM228B    | FAM228B    | family with sequence similarity 228 member B                | HGNC:24736 | 2p23.3       | 0.76305378 | 1.51804436 | 3.87141231 | 0.00096587 | 0.02697073 | -0.6023979 |
| ENSG000000081818.3_PCDHB4     | PCDHB4     | protocadherin beta 4                                        | HGNC:8689  | 5q31.3       | -1.4405109 | -0.0983067 | -3.9918912 | 0.00027983 | 0.02303961 | -0.6049014 |
| ENSG000000267645.5_AC105052.3 | AC105052.3 |                                                             |            |              | 3.95572223 | -1.0816791 | 4.25152423 | 0.00039892 | 0.01738819 | -0.6108323 |
| ENSG000000229833.9_PET100     | PET100     | PET100 cytochrome c oxidase chaperone                       | HGNC:40038 | 19p13.2      | 0.70658525 | 4.05339974 | 3.91503978 | 0.00087727 | 0.02576007 | -0.6174817 |
| ENSG000000269893.7_SNHG8      | SNHG8      | small nucleolar RNA host gene 8                             | HGNC:33098 | 4q26         | 0.60771417 | 3.47411729 | 3.90298672 | 0.00089751 | 0.02605964 | -0.6193675 |
| ENSG000000135439.11_AGAP2     | AGAP2      | ArfGAP with GTPase domain, ankyrin repeat and PH domain 2   | HGNC:16921 | 12q14.1      | -0.9445402 | 3.55978079 | -3.9037166 | 0.00089598 | 0.02605964 | -0.6224679 |
| ENSG000000120594.17_PLXDC2    | PLXDC2     | plexin domain containing 2                                  | HGNC:21013 | 10p12.31     | -0.7164692 | 3.27485927 | -3.897124  | 0.00090983 | 0.02620087 | -0.6240299 |
| ENSG000000187474.5_FPR3       | FPR3       | formyl peptide receptor 3                                   | HGNC:3828  | 19q13.41     | -2.1523751 | -0.9824269 | -4.1682487 | 0.00048417 | 0.01859777 | -0.6326353 |
| ENSG000000183580.10_FBXL7     | FBXL7      | F-box and leucine rich repeat protein 7                     | HGNC:13604 | 5p15.1       | -0.8459617 | 1.23505157 | -3.8560384 | 0.00100102 | 0.02754171 | -0.6360333 |
| ENSG000000198258.10_UBL5      | UBL5       | ubiquitin like 5                                            | HGNC:13736 | 19p13.2      | 0.63334678 | 6.31102873 | 3.92004176 | 0.00086261 | 0.02551235 | -0.6383005 |
| ENSG000000149564.12_ESAM      | ESAM       | endothelial cell adhesion molecule                          | HGNC:17474 | 11q24.2      | -0.7803918 | 3.94389879 | -3.9025165 | 0.00089849 | 0.02605964 | -0.6455718 |
| ENSG000000169189.17_NSMCE1    | NSMCE1     | NSE1 homolog, SMC5-SMC6 complex component                   | HGNC:29897 | 16p12.1      | 0.5069384  | 4.10503552 | 3.90488048 | 0.00089356 | 0.02605964 | -0.6463964 |
| ENSG000000106571.14_GLI3      | GLI3       | GLI family zinc finger 3                                    | HGNC:4319  | 7p14.1       | -0.8900324 | 0.63455468 | -3.8648378 | 0.00098075 | 0.02713346 | -0.6486174 |
| ENSG00000053918.16_KCNQ1      | KCNQ1      | potassium voltage-gated channel subfamily Q member 1        | HGNC:6294  | 11p15.5-p15. | -1.622771  | -0.3446998 | -3.9700521 | 0.00076787 | 0.02365109 | -0.6550741 |
| ENSG000000155034.19_FBXL18    | FBXL18     | F-box and leucine rich repeat protein 18                    | HGNC:21874 | 7p22.1       | -0.7732415 | 2.87216326 | -3.8666192 | 0.0009767  | 0.02707122 | -0.6575105 |
| ENSG000000144619.15_CNTN4     | CNTN4      | contactin 4                                                 | HGNC:2174  | 3p26.3-p26.2 | -2.0994314 | -1.3890987 | -4.1877164 | 0.00046273 | 0.01811669 | -0.6588635 |
| ENSG000000152518.8_ZFP36L2    | ZFP36L2    | ZFP36 ring finger protein like 2                            | HGNC:1108  | 2p21         | -0.7322447 | 4.88743294 | -3.9048658 | 0.00089359 | 0.02605964 | -0.6659856 |
| ENSG000000103222.19_ABCC1     | ABCC1      | ATP binding cassette subfamily C member 1                   | HGNC:51    | 16p13.11     | -0.6096864 | 4.59166274 | -3.898271  | 0.0009074  | 0.02620087 | -0.6748528 |
| ENSG000000113312.11_TTC1      | TTC1       | tetratricopeptide repeat domain 1                           | HGNC:12391 | 5q33.3       | 0.50077651 | 5.55176448 | 3.90273181 | 0.00089804 | 0.02605964 | -0.6767354 |
| ENSG000000162522.11_KIAA1522  | KIAA1522   | KIAA1522                                                    | HGNC:29301 | 1p35.1       | -1.1486877 | 1.71657842 | -3.8337775 | 0.00105417 | 0.02868824 | -0.6803028 |
| ENSG000000084754.12_HADHA     | HADHA      | hydroxyacyl-CoA dehydrogenase trifunctional multienzyme co  | HGNC:4801  | 2p23.3       | 0.4225713  | 8.32935783 | 3.89292219 | 0.00091876 | 0.02630824 | -0.682655  |
| ENSG000000163453.11_IGFBP7    | IGFBP7     | insulin like growth factor binding protein 7                | HGNC:5476  | 4q12         | -0.6825846 | 6.08877158 | -3.8979888 | 0.000908   | 0.02620087 | -0.6866339 |
| ENSG000000136861.18_CDK5RAP2  | CDK5RAP2   | CDK5 regulatory subunit associated protein 2                | HGNC:18672 | 9q33.2       | 0.41638754 | 5.87480016 | 3.89687772 | 0.00091035 | 0.02620087 | -0.6899708 |
| ENSG000000198668.11_CALM1     | CALM1      | calmodulin 1                                                | HGNC:1442  | 14q32.11     | 0.55080459 | 8.7741071  | 3.88442628 | 0.00093709 | 0.02661296 | -0.6956191 |
| ENSG000000065427.14_KARS      | KARS       | lysyl-tRNA synthetase 1                                     | HGNC:6215  | 16q23.1      | 0.47220862 | 7.02661665 | 3.89264981 | 0.00091934 | 0.02630824 | -0.6962411 |
| ENSG000000061337.15_LZTS1     | LZTS1      | leucine zipper tumor suppressor 1                           | HGNC:13861 | 8p21.3       | -1.2775263 | 0.34774674 | -3.8590792 | 0.00099397 | 0.02739801 | -0.6989124 |
| ENSG000000126756.12_UXT       | UXT        | ubiquitously expressed prefoldin like chaperone             | HGNC:12641 | Xp11.23      | 0.5960211  | 4.01578114 | 3.87782227 | 0.00095159 | 0.02697073 | -0.6996454 |
| ENSG000000170906.15_NDUFA3    | NDUFA3     | NADH:ubiquinone oxidoreductase subunit A3                   | HGNC:7686  | 19q13.42     | 0.75460169 | 6.54656048 | 3.89175267 | 0.00092126 | 0.02631296 | -0.7000101 |
| ENSG000000147100.11_SLC16A2   | SLC16A2    | solute carrier family 16 member 2                           | HGNC:10923 | Xq13.2       | -0.9753665 | 1.41781339 | -3.8229644 | 0.00108099 | 0.02900515 | -0.7003654 |
| ENSG000000115468.12_EFHD1     | EFHD1      | EF-hand domain family member D1                             | HGNC:29556 | 2q37.1       | -0.6591079 | 3.45107576 | -3.8681641 | 0.0009732  | 0.02702418 | -0.7005169 |
| ENSG000000249437.7_NAIP       | NAIP       | NLR family apoptosis inhibitory protein                     | HGNC:7634  | 5q13.2       | -1.3897651 | 1.6200146  | -3.8228477 | 0.00108128 | 0.02900515 | -0.7007564 |
| ENSG000000220842.6_RPL21P16   | RPL21P16   | ribosomal protein L21 pseudogene 16                         | HGNC:31396 | 10q26.12     | 0.92495257 | 2.11210828 | 3.82388643 | 0.00107867 | 0.02900515 | -0.7051327 |
| ENSG000000204628.11_RACK1     | RACK1      | receptor for activated C kinase 1                           | HGNC:4399  | 5q35.3       | 0.52071517 | 8.72827867 | 3.87703413 | 0.00095333 | 0.02697073 | -0.7121694 |
| ENSG000000197183.14_NOL4L     | NOL4L      | nucleolar protein 4 like                                    | HGNC:16106 | 20q11.21     | -1.153285  | 0.88811012 | -3.822638  | 0.00108181 | 0.02900515 | -0.7246551 |
| ENSG000000240801.1_AC132217.1 | AC132217.1 |                                                             |            |              | 1.1076211  | 1.63835543 | 3.8102203  | 0.00111347 | 0.02954816 | -0.7268258 |
| ENSG000000100129.18_EIF3L     | EIF3L      | eukaryotic translation initiation factor 3 subunit L        | HGNC:18138 | 22q13.1      | 0.4453972  | 7.87407412 | 3.87545072 | 0.00095685 | 0.02697073 | -0.7276419 |
| ENSG000000157103.12_SLC6A1    | SLC6A1     | solute carrier family 6 member 1                            | HGNC:11042 | 3p25.3       | -1.2090769 | 0.89338203 | -3.8128695 | 0.00110664 | 0.02947432 | -0.729973  |
| ENSG000000138696.10_BMPR1B    | BMPR1B     | bone morphogenetic protein receptor type 1B                 | HGNC:1077  | 4q22.3       | 0.87873846 | 1.2795475  | 3.80860496 | 0.00111766 | 0.02955776 | -0.7334324 |
| ENSG000000019549.12_SNAI2     | SNAI2      | snail family transcriptional repressor 2                    | HGNC:11094 | 8q11.21      | -0.8990546 | 0.88136165 | -3.8131831 | 0.00110583 | 0.02947432 | -0.7350312 |
| ENSG000000126267.10_COX6B1    | COX6B1     | cytochrome c oxidase subunit 6B1                            | HGNC:2280  | 19q13.12     | 0.62034281 | 7.75936298 | 3.87207469 | 0.00096439 | 0.02697073 | -0.7363385 |
| ENSG000000119705.9_SLIRP      | SLIRP      | SRA stem-loop interacting RNA binding protein               | HGNC:20495 | 14q24.3      | 0.62917287 | 5.28992618 | 3.87480623 | 0.00095828 | 0.02697073 | -0.7366518 |
| ENSG000000196683.10_TOMM7     | TOMM7      | translocase of outer mitochondrial membrane 7               | HGNC:21648 | 7p15.3       | 0.55579375 | 7.49711835 | 3.87244107 | 0.00096357 | 0.02697073 | -0.737666  |
| ENSG000000186184.17_POLR1D    | POLR1D     | RNA polymerase I and III subunit D                          | HGNC:20422 | 13q12.2      | 0.47256926 | 5.27672372 | 3.87389653 | 0.00096031 | 0.02697073 | -0.7391671 |
| ENSG000000196730.13_DAPK1     | DAPK1      | death associated protein kinase 1                           | HGNC:2674  | 9q21.33      | -0.9696873 | 1.4140355  | -3.8036162 | 0.00113068 | 0.02970623 | -0.7401448 |
| ENSG000000175334.8_BANF1      | BANF1      | BAF nuclear assembly factor 1                               | HGNC:17397 | 11q13.1      | 0.40389302 | 7.07245214 | 3.87059411 | 0.00096771 | 0.02697185 | -0.7447356 |
| ENSG000000163933.10_RFT1      | RFT1       | RFT1 homolog                                                | HGNC:30220 | 3p21.1       | -0.6236134 | 1.71837851 | -3.7907198 | 0.00116506 | 0.02988719 | -0.767521  |
| ENSG000000091640.8_SPAG7      | SPAG7      | sperm associated antigen 7                                  | HGNC:11216 | 17p13.2      | 0.6376235  | 6.58577017 | 3.85942178 | 0.00099317 | 0.02739801 | -0.7713078 |
| ENSG000000085511.20_MAP3K4    | MAP3K4     | mitogen-activated protein kinase kinase kinase 4            | HGNC:6856  | 6q26         | 0.49491275 | 4.05276833 | 3.84662252 | 0.00102316 | 0.02799697 | -0.7716262 |
| ENSG000000174944.9_P2RY14     | P2RY14     | purinergic receptor P2Y14                                   | HGNC:16442 | 3q25.1       | -1.5329462 | 0.15623174 | -3.8297076 | 0.00106418 | 0.028804   | -0.7824068 |
| ENSG000000227051.6_C14orf132  | C14orf132  | chromosome 14 open reading frame 132                        | HGNC:20346 | 14q32.2      | -1.2427167 | 1.6928556  | -3.7837801 | 0.00118399 | 0.03011981 | -0.7851469 |
| ENSG000000155962.13_CLIC2     | CLIC2      | chloride intracellular channel 2                            | HGNC:2063  | Xq28         | -0.8310104 | 1.26572515 | -3.7795702 | 0.00119562 | 0.0301316  | -0.7893986 |
| ENSG000000139874.6_SSTR1      | SSTR1      | somatostatin receptor 1                                     | HGNC:11330 | 14q13        | -1.792891  | -1.0852811 | -4.0529497 | 0.00063317 | 0.02115452 | -0.7943189 |
| ENSG000000196704.12_AMZ2      | AMZ2       | archaealysin family metallopeptidase 2                      | HGNC:28041 | 17q24.2      | 0.42149247 | 5.50621366 | 3.84897475 | 0.00101759 | 0.02789524 | -0.7952047 |
| ENSG000000162836.12_ACP6      | ACP6       | acid phosphatase 6, lysophosphatidic                        | HGNC:29609 | 1q21.2       | 0.79621351 | 2.62420583 | 3.79210383 | 0.00116132 | 0.02988719 | -0.7952865 |
| ENSG000000196411.10_EPHB4     | EPHB4      | EPH receptor B4                                             | HGNC:3395  | 7q22.1       | -1.0915892 | 2.93030467 | -3.8043046 | 0.00112888 | 0.02970623 | -0.799527  |
| ENSG000000109472.14_CPE       | CPE        | carboxypeptidase E                                          | HGNC:2303  | 4q32.3       | -0.7703055 | 4.40879326 | -3.8384672 | 0.00104274 | 0.02842889 | -0.8038667 |
| ENSG000000079308.19_TNS1      | TNS1       | tensin 1                                                    | HGNC:11973 | 2q35         | -0.712647  | 7.93293826 | -3.839383  | 0.00104052 | 0.02842013 | -0.8038723 |
| ENSG000000178904.19_DPY19L3   | DPY19L3    | dpy-19 like C-mannosyltransferase 3                         | HGNC:27120 | 19q13.11     | -0.7179597 | 1.22762011 | -3.7697472 | 0.0012232  | 0.03053395 | -0.8114153 |
| ENSG000000148444.16_COMMD3    | COMMD3     | COMMD domain containing 3                                   | HGNC:23332 | 10p12.2      | 0.51109034 | 4.87491294 | 3.83236446 | 0.00105763 | 0.02873045 | -0.8257977 |
| ENSG000000130816.16_DNMT1     | DNMT1      | DNA methyltransferase 1                                     | HGNC:2976  | 19p13.2      | -0.5724171 | 3.11437427 | -3.7969497 | 0.00114833 | 0.02984254 | -0.8285803 |
| ENSG000000106560.11_GIMAP2    | GIMAP2     | GTPase, IMAP family member 2                                | HGNC:21789 | 7q36.1       | -0.8836459 | 0.45189733 | -3.7915484 | 0.00116282 | 0.02988719 | -0.8304574 |
| ENSG000000130595.19_TNNT3     | TNNT3      | troponin T3, fast skeletal type                             | HGNC:11950 | 11p15.5      | 1.00953921 | 12.6792326 | 3.79878685 | 0.00114344 | 0.02976707 | -0.8305181 |
| ENSG000000179085.7_DPM3       | DPM3       | dolichyl-phosphate mannosyltransferase subunit 3, regulator | HGNC:3007  | 1q22         | 0.55896365 | 4.17222514 | 3.82068085 | 0.00108674 | 0.02904746 | -0.8307668 |
| ENSG000000174059.16_CD34      | CD34       | CD34 molecule                                               | HGNC:1662  | 1q32.2       | -0.6929163 | 5.50945309 | -3.8298656 | 0.00106379 | 0.028804   | -0.836515  |
| ENSG000000079819.19_EPB41L2   | EPB41L2    | erythrocyte membrane protein band 4.1 like 2                | HGNC:3379  | 6q23.1-q23.2 | -0.8380853 | 4.26695389 | -3.8220763 | 0.00108322 | 0.02900515 | -0.8375823 |
| ENSG000000205215.8_KRT17P7    | KRT17P7    | keratin 17 pseudogene 7                                     | HGNC:50725 | 17p11.2      | 2.71100743 | -0.0761078 | 3.91038889 | 0.00088219 | 0.02598905 | -0.8390784 |
| ENSG000000149084.13_HSD17B12  | HSD17B12   | hydroxysteroid 17-beta dehydrogenase 12                     | HGNC:18646 | 11p11.2      | -0.5699128 | 3.40142873 | -3.8006581 | 0.00113848 | 0.02976004 | -0.8430126 |
| ENSG000000165731.19_RET       | RET        | ret proto-oncogene                                          | HGNC:9967  | 10q11.21     | -1.5826658 | 1.5705106  | -3.7524557 | 0.00127329 | 0.03118699 | -0.8448584 |
| ENSG000000109787.13_KLF3      | KLF3       | Kruppel like factor 3                                       | HGNC:16516 | 4p14         | -0.6016255 | 3.10010975 | -3.7903769 | 0.00116599 | 0.02988719 | -0.8502048 |
| ENSG000000019144.19_PHLDB1    | PHLDB1     | pleckstrin homology like domain family B member 1           | HGNC:23697 | 11q23.3      | -0.7056089 | 5.92546496 | -3.8241824 | 0.00107793 | 0.02900515 | -0.8495919 |
| ENSG000000171488.15_LRRRC8C   | LRRRC8C    | leucine rich repeat containing 8 VRAC subunit C             | HGNC:25075 | 1p22.2       | -0.6662397 | 1.70564487 | -3.752407  | 0.00127344 | 0.03118699 | -0.8513397 |
| ENSG000000137491.14_SLCO2B1   | SLCO2B1    | solute carrier organic anion transporter family member 2B1  | HGNC:10962 | 11q13.4      | -1.2836653 | 2.56691001 | -3.7618333 | 0.00124588 | 0.03077377 | -0.8645768 |
| ENSG000000112394.17_SLC16A10  | SLC16A10   | solute carrier family 16 member 10                          | HGNC:17027 | 6q21         | 0.72337944 | 4.7887064  | 3.8095046  | 0.00111532 | 0.02954816 | -0.8733445 |
| ENSG000000100345.21_MYH9      | MYH9       | myosin heavy chain 9                                        | HGNC:7579  | 22q12.3      | -1.0403566 | 7.16885331 | -3.8105471 | 0.00111263 | 0.02954816 | -0.8738918 |
| ENSG000000085276.18_MECOM     | MECOM      | MDS1 and EV                                                 |            |              |            |            |            |            |            |            |

|                              |            |                                                           |            |              |            |            |            |            |            |            |
|------------------------------|------------|-----------------------------------------------------------|------------|--------------|------------|------------|------------|------------|------------|------------|
| ENSG00000103363.14_ELOB      | ELOB       | elongin B                                                 | HGNC:11619 | 16p13.3      | 0.7681005  | 6.79437925 | 3.77804474 | 0.00119986 | 0.03018777 | -0.949598  |
| ENSG00000130770.18_ATP5IF1   | ATP5IF1    | ATP synthase inhibitory factor subunit 1                  | HGNC:871   | 1p35.3       | 0.64461605 | 7.13678669 | 3.77449315 | 0.0012098  | 0.03033593 | -0.9560231 |
| ENSG00000167085.11_PHB       | PHB        | prohibitin                                                | HGNC:8912  | 17q21.33     | 0.44665498 | 6.45918265 | 3.77221618 | 0.00121621 | 0.0304458  | -0.9635171 |
| ENSG00000161920.10_MED11     | MED11      | mediator complex subunit 11                               | HGNC:32687 | 17p13.2      | 0.50147419 | 3.096247   | 3.73156001 | 0.00133655 | 0.0318635  | -0.9651599 |
| ENSG00000175220.12_ARHGAP1   | ARHGAP1    | Rho GTPase activating protein 1                           | HGNC:673   | 11p11.2      | -0.7764755 | 3.89832703 | -3.7544399 | 0.00126744 | 0.03115622 | -0.9668157 |
| ENSG00000261087.1_AP003469.4 | AP003469.4 |                                                           |            |              | 0.68126471 | 3.20000569 | 3.73177874 | 0.00133587 | 0.0318635  | -0.9670749 |
| ENSG00000103335.22_PIEZO1    | PIEZO1     | piezo type mechanosensitive ion channel component 1       | HGNC:28993 | 16q24.3      | -1.1468034 | 3.65919546 | -3.7471421 | 0.00128909 | 0.03118699 | -0.968514  |
| ENSG00000254999.4_BRK1       | BRK1       | BRICK1 subunit of SCAR/WAVE actin nucleating complex      | HGNC:23057 | 3p25.3       | 0.45939641 | 6.14756621 | 3.76834938 | 0.00122718 | 0.03056725 | -0.9727633 |
| ENSG00000129244.9_ATP1B2     | ATP1B2     | ATPase Na+/K+ transporting subunit beta 2                 | HGNC:805   | 17p13.1      | -1.1978975 | 0.06240838 | -3.7365178 | 0.00132127 | 0.03180155 | -0.9761618 |
| ENSG00000073282.13_TP63      | TP63       | tumor protein p63                                         | HGNC:15979 | 3q28         | 0.95766358 | 4.80930098 | 3.76180448 | 0.00124596 | 0.03077377 | -0.9764587 |
| ENSG00000143575.14_HAX1      | HAX1       | HCLS1 associated protein X-1                              | HGNC:16915 | 1q21.3       | 0.44446074 | 6.5859701  | 3.76574166 | 0.00123463 | 0.03065102 | -0.9774459 |
| ENSG00000185437.13_SH3BGR    | SH3BGR     | SH3 domain binding glutamate rich protein                 | HGNC:10822 | 21q22.2      | 0.55873872 | 7.98036282 | 3.76127854 | 0.00124748 | 0.03077377 | -0.9775617 |
| ENSG00000145741.15_BTF3      | BTF3       | basic transcription factor 3                              | HGNC:1125  | 5q13.2       | 0.55662599 | 7.69354243 | 3.76113283 | 0.00124791 | 0.03077377 | -0.9808262 |
| ENSG00000179104.9_TMTC2      | TMTC2      | transmembrane O-mannosyltransferase targeting cadherins 2 | HGNC:25440 | 12q21.31     | -1.3098352 | -0.2410937 | -3.7604683 | 0.00124983 | 0.03077377 | -0.9830323 |
| ENSG00000163590.14_PPM1L     | PPM1L      | protein phosphatase, Mg2+/Mn2+ dependent 1L               | HGNC:16381 | 3q25.33-q26. | 0.61707173 | 4.13392351 | 3.75097627 | 0.00127767 | 0.03118699 | -0.9830738 |
| ENSG00000158813.18_EDA       | EDA        | ectodysplasin A                                           | HGNC:3157  | Xq13.1       | -0.990205  | 0.48295954 | -3.703422  | 0.00142668 | 0.03291245 | -0.9855251 |
| ENSG00000280153.1_AC133065.3 | AC133065.3 |                                                           |            |              | -2.5696122 | -1.9848526 | -4.0489903 | 0.00063903 | 0.02124657 | -0.9899037 |
| ENSG00000136802.11_LRRC8A    | LRRC8A     | leucine rich repeat containing 8 VRAC subunit A           | HGNC:19027 | 9q34.11      | -0.6015152 | 3.35014028 | -3.7306599 | 0.00133934 | 0.0318635  | -0.9907248 |
| ENSG00000182240.16_BACE2     | BACE2      | beta-secretase 2                                          | HGNC:934   | 21q22.2-q22. | -0.5527742 | 2.22919476 | -3.694901  | 0.00145515 | 0.03326207 | -0.9929654 |
| ENSG00000269113.4_TRABD2B    | TRABD2B    | TraB domain containing 2B                                 | HGNC:44200 | 1p33         | -1.406886  | -0.5311833 | -3.8004118 | 0.00113913 | 0.02976004 | -1.0088825 |
| ENSG00000213366.13_GSTM2     | GSTM2      | glutathione S-transferase mu 2                            | HGNC:4634  | 1p13.3       | 0.57854873 | 6.8763441  | 3.75036839 | 0.0013571  | 0.03209726 | -1.0162631 |
| ENSG00000129467.13_ADCY4     | ADCY4      | adenylate cyclase 4                                       | HGNC:235   | 14q12        | -0.8507954 | 3.48939555 | -3.7233793 | 0.00136216 | 0.03215636 | -1.0112259 |
| ENSG00000140319.10_SRP14     | SRP14      | signal recognition particle 14                            | HGNC:11299 | 15q22        | 0.44199567 | 7.06729628 | 3.74898525 | 0.00128359 | 0.03118699 | -1.0120759 |
| ENSG00000131100.13_ATP6V1E1  | ATP6V1E1   | ATPase H+ transporting V1 subunit E1                      | HGNC:857   | 22q11.21     | 0.44382292 | 6.17412921 | 3.74951146 | 0.00128202 | 0.03118699 | -1.0140887 |
| ENSG00000147687.19_TATDN1    | TATDN1     | TatD DNase domain containing 1                            | HGNC:24220 | 8q24.13      | 0.54996808 | 3.78569633 | 3.72881503 | 0.00134509 | 0.0318635  | -1.0151965 |
| ENSG00000114790.13_ARHGEF26  | ARHGEF26   | Rho guanine nucleotide exchange factor 26                 | HGNC:24490 | 3q25.2       | -1.3017258 | -1.2476631 | -3.8850552 | 0.00093572 | 0.02661296 | -1.0158807 |
| ENSG00000105137.13_SYDE1     | SYDE1      | synapse defective Rho GTPase homolog 1                    | HGNC:25824 | 19p13.12     | -0.8629963 | 1.87191903 | -3.6711862 | 0.00153736 | 0.0344585  | -1.0220996 |
| ENSG00000143772.9_ITPKB      | ITPKB      | inositol-trisphosphate 3-kinase B                         | HGNC:6179  | 1q42.12      | -0.7184662 | 3.76396592 | -3.7249835 | 0.0013571  | 0.03209726 | -1.0269631 |
| ENSG00000129460.16_NGDN      | NGDN       | neuroguidin                                               | HGNC:20271 | 14q11.2      | 0.52050271 | 3.77860486 | 3.71758587 | 0.00138058 | 0.03244803 | -1.0386702 |
| ENSG00000119801.13_YPEL5     | YPEL5      | yippee like 5                                             | HGNC:18329 | 2p23.1       | 0.38786211 | 4.70633168 | 3.73262269 | 0.00133326 | 0.0318635  | -1.0425202 |
| ENSG00000140577.16_CRTC3     | CRTC3      | CREB regulated transcription coactivator 3                | HGNC:26148 | 15q26.1      | -0.5029952 | 3.70017631 | -3.7139996 | 0.00139211 | 0.03258401 | -1.0481479 |
| ENSG00000181982.18_CCDC149   | CCDC149    | coiled-coil domain containing 149                         | HGNC:25405 | 4p15.2       | -0.5284132 | 2.22047173 | -3.6656478 | 0.00155722 | 0.03464457 | -1.0524223 |
| ENSG00000241370.5_RPP21      | RPP21      | ribonuclease P/MRP subunit p21                            | HGNC:21300 | 6p22.1       | 0.5881849  | 3.2398346  | 3.69411748 | 0.00145779 | 0.03327182 | -1.0530798 |
| ENSG00000168899.5_VAMP5      | VAMP5      | vesicle associated membrane protein 5                     | HGNC:12646 | 2p11.2       | 0.54944092 | 5.91404457 | 3.73173948 | 0.00133599 | 0.0318635  | -1.0533825 |
| ENSG00000126088.14_UROD      | UROD       | uroporphyrinogen decarboxylase                            | HGNC:12591 | 3p34.1       | 0.41385766 | 5.4882489  | 3.73022354 | 0.0013407  | 0.0318635  | -1.0561693 |
| ENSG00000177156.11_TALDO1    | TALDO1     | transaldolase 1                                           | HGNC:11559 | 11p15.5      | 0.51143477 | 5.54789432 | 3.72948256 | 0.00134301 | 0.0318635  | -1.0579038 |
| ENSG00000137818.12_RPLP1     | RPLP1      | ribosomal protein lateral stalk subunit P1                | HGNC:10372 | 15q23        | 0.58415571 | 10.389532  | 3.70599384 | 0.0014182  | 0.03290341 | -1.0600566 |
| ENSG00000266028.7_SRGAP2     | SRGAP2     | SLIT-ROBO Rho GTPase activating protein 2                 | HGNC:19751 | 1q32.1       | -0.7086082 | 2.64111419 | -3.6747053 | 0.00152488 | 0.03441982 | -1.0620657 |
| ENSG00000136048.14_DRAM1     | DRAM1      | DNA damage regulated autophagy modulator 1                | HGNC:25645 | 12q23.2      | -0.8995237 | 1.13947478 | -3.6437992 | 0.00163804 | 0.03538318 | -1.064514  |
| ENSG00000149480.7_MTA2       | MTA2       | metastasis associated 1 family member 2                   | HGNC:7411  | 11q12.3      | -0.5215445 | 3.56194787 | -3.699685  | 0.0014391  | 0.03309702 | -1.0669695 |
| ENSG00000143515.17_ATP8B2    | ATP8B2     | ATPase phospholipid transporting 8B2                      | HGNC:13534 | 1q21.3       | -0.9261875 | 2.33774749 | -3.6618834 | 0.00157085 | 0.03474183 | -1.0684186 |
| ENSG00000120699.13_EXOSC8    | EXOSC8     | exosome component 8                                       | HGNC:17035 | 13q13.3      | 0.47906416 | 3.76867193 | 3.70122207 | 0.00143398 | 0.03302994 | -1.0739905 |
| ENSG00000197312.12_DDI2      | DDI2       | DNA damage inducible 1 homolog 2                          | HGNC:24578 | 1p36.21      | 0.68970649 | 5.61516236 | 3.72069093 | 0.00137068 | 0.03226576 | -1.0772151 |
| ENSG00000103351.13_CLUAP1    | CLUAP1     | clusterin associated protein 1                            | HGNC:19009 | 16p13.3      | 0.57373916 | 2.87093385 | 3.66914431 | 0.00154465 | 0.03451871 | -1.0796855 |
| ENSG00000155660.11_PDIA4     | PDIA4      | protein disulfide isomerase family A member 4             | HGNC:30167 | 7q36.1       | -0.5705871 | 3.0001994  | -3.6766837 | 0.0015179  | 0.03433023 | -1.0802892 |
| ENSG00000169604.19_ANTXR1    | ANTXR1     | ANTXR cell adhesion molecule 1                            | HGNC:21014 | 2p13.3       | -0.8190603 | 3.432353   | -3.6918122 | 0.0014656  | 0.03334907 | -1.0817933 |
| ENSG00000008344.17_PLOD1     | PLOD1      | procollagen-lysine,2-oxoglutarate 5-dioxygenase 1         | HGNC:9081  | 1p36.22      | -0.469849  | 4.75128444 | -3.7148083 | 0.00138951 | 0.03258401 | -1.0826921 |
| ENSG00000132514.13_CLEC10A   | CLEC10A    | C-type lectin domain containing 10A                       | HGNC:16916 | 17p13.1      | -1.7606527 | -0.1710706 | -3.7039873 | 0.00142481 | 0.03291245 | -1.0838875 |
| ENSG00000147119.3_CHST7      | CHST7      | carbohydrate sulfotransferase 7                           | HGNC:13817 | Xp11.3       | -1.0219252 | 0.87038491 | -3.6352012 | 0.00167098 | 0.03568143 | -1.090764  |
| ENSG00000285336.1_AC108734.4 | AC108734.4 |                                                           |            |              | 1.04589232 | 1.53501657 | 3.62926672 | 0.00169409 | 0.03593052 | -1.093659  |
| ENSG00000108557.19_RAI1      | RAI1       | retinoic acid induced 1                                   | HGNC:9834  | 17p11.2      | -0.6623367 | 3.40491238 | -3.6792278 | 0.00150898 | 0.03417998 | -1.0962252 |
| ENSG00000105825.13_TFPI2     | TFPI2      | tissue factor pathway inhibitor 2                         | HGNC:11761 | 7q21.3       | -1.6384159 | -0.9068573 | -3.8497013 | 0.00101587 | 0.02789524 | -1.1003373 |
| ENSG00000137100.16_DCTN3     | DCTN3      | dynactin subunit 3                                        | HGNC:2713  | 9p13.3       | 0.41777137 | 5.549703   | 3.71017434 | 0.00140452 | 0.0328049  | -1.1004163 |
| ENSG00000074317.11_SNCB      | SNCB       | synuclein beta                                            | HGNC:11140 | 5q35.2       | 1.68762084 | -0.91817   | 3.86860066 | 0.00097221 | 0.02702418 | -1.101322  |
| ENSG00000161940.10_BCL6B     | BCL6B      | BCL6B transcription repressor                             | HGNC:1002  | 17p13.1      | -1.1268986 | 2.08037399 | -3.6341091 | 0.00167521 | 0.03568143 | -1.1040121 |
| ENSG00000167325.15_RRM1      | RRM1       | ribonucleotide reductase catalytic subunit M1             | HGNC:10451 | 11p15.4      | 0.43062514 | 4.76767686 | 3.70498349 | 0.00142153 | 0.03290341 | -1.1046244 |
| ENSG00000053371.12_AKR7A2    | AKR7A2     | aldo-keto reductase family 7 member A2                    | HGNC:389   | 1p36.13      | 0.61502041 | 4.9180595  | 3.70486961 | 0.0014219  | 0.03290341 | -1.1053277 |
| ENSG00000156011.17_PSD3      | PSD3       | pleckstrin and Sec7 domain containing 3                   | HGNC:19093 | 8p22         | -0.9554814 | 0.0912575  | -3.6644696 | 0.00156147 | 0.03468878 | -1.106102  |
| ENSG00000135972.9_MRPS9      | MRPS9      | mitochondrial ribosomal protein S9                        | HGNC:14501 | 2q12.1       | 0.56533487 | 5.47206957 | 3.707349   | 0.00141375 | 0.03290341 | -1.1062925 |
| ENSG00000146425.11_DYNLT1    | DYNLT1     | dynein light chain Tctex-type 1                           | HGNC:11697 | 6q25.3       | 0.74613338 | 4.51437626 | 3.69822617 | 0.00144397 | 0.03315829 | -1.1113707 |
| ENSG00000125352.5_RNF113A    | RNF113A    | ring finger protein 113A                                  | HGNC:12974 | Xq24         | 0.49148613 | 2.501936   | 3.64205111 | 0.00164469 | 0.03538318 | -1.1133373 |
| ENSG00000196419.12_XRCC6     | XRCC6      | X-ray repair cross complementing 6                        | HGNC:4055  | 22q13.2      | 0.38348199 | 7.36285893 | 3.69727506 | 0.00144716 | 0.03318067 | -1.1236937 |
| ENSG00000228049.7_POLR2J2    | POLR2J2    | RNA polymerase II subunit J2                              | HGNC:23208 | 7q22.1       | 1.59470501 | 1.85405722 | 3.6142979  | 0.00175738 | 0.03266271 | -1.1246377 |
| ENSG00000169371.13_SNUPN     | SNUPN      | snurportin 1                                              | HGNC:14245 | 15q24.2      | 0.34739124 | 3.97208022 | 3.6837109  | 0.00149338 | 0.03392897 | -1.1257841 |
| ENSG00000076356.7_PLXNA2     | PLXNA2     | plexin A2                                                 | HGNC:9100  | 1q32.2       | -0.5538002 | 3.96141906 | -3.6830608 | 0.00149564 | 0.03392897 | -1.1281468 |
| ENSG00000090006.17_LTBP4     | LTBP4      | latent transforming growth factor beta binding protein 4  | HGNC:6717  | 19q13.2      | -1.0688779 | 6.21357558 | -3.6964624 | 0.00144989 | 0.03319249 | -1.1291338 |
| ENSG00000114021.12_NIT2      | NIT2       | nitrilase family member 2                                 | HGNC:29878 | 3q12.2       | 0.43029245 | 4.81798669 | 3.69180583 | 0.00146562 | 0.03334907 | -1.1334231 |
| ENSG000000021762.20_OSBPL5   | OSBPL5     | oxysterol binding protein like 5                          | HGNC:16392 | 11p15.4      | -0.7167308 | 2.6788565  | -3.6360505 | 0.0016677  | 0.03567344 | -1.1408651 |
| ENSG00000138028.16_CGREF1    | CGREF1     | cell growth regulator with EF-hand domain 1               | HGNC:16962 | 2p23.3       | 1.16270123 | 0.74326704 | 3.6187915  | 0.00173566 | 0.03642773 | -1.1461353 |
| ENSG00000205312.8_KRT17P4    | KRT17P4    | keratin 17 pseudogene 4                                   | HGNC:50722 | 17p11.2      | 2.6829519  | 0.07783796 | 3.72283252 | 0.00136388 | 0.03215636 | -1.1461755 |
| ENSG00000183671.12_GPR1      | GPR1       | G protein-coupled receptor 1                              | HGNC:4463  | 2q33.3       | -1.9579613 | -0.9735618 | -3.7933186 | 0.00115805 | 0.02988719 | -1.1473732 |
| ENSG00000049541.11_RFC2      | RFC2       | replication factor C subunit 2                            | HGNC:9970  | 7q11.23      | 0.424562   | 3.21124866 | 3.64888097 | 0.00161888 | 0.03518132 | -1.1490087 |
| ENSG00000285796.1_AL162458.1 | AL162458.1 |                                                           |            |              | -1.0372951 | 1.3424495  | -3.5989545 | 0.00181717 | 0.03742914 | -1.1554397 |
| ENSG00000182004.13_SNRPE     | SNRPE      | small nuclear ribonucleoprotein polypeptide E             | HGNC:11161 | 1q32.1       | 0.55295146 | 3.96803222 | 3.66767945 | 0.0015499  | 0.03458436 | -1.1564941 |
| ENSG00000164402.14_SEPT8     | SEPT8      | septin-8                                                  |            |              | -0.6029271 | 2.94623925 | -3.6391536 | 0.00165576 | 0.0355542  | -1.1628646 |
| ENSG00000137154.12_RPS6      | RPS6       | ribosomal protein S6                                      | HGNC:10429 | 9p22.1       | 0.47690711 | 8.60997679 | 3.67181483 | 0.00153512 | 0.0344585  | -1.1633043 |
| ENSG00000120690.16_ELF1      | ELF1       | E74 like ETS transcription factor 1                       | HGNC:3316  | 13q14.11     |            |            |            |            |            |            |

|                                 |              |                                                             |            |              |            |            |            |            |            |            |
|---------------------------------|--------------|-------------------------------------------------------------|------------|--------------|------------|------------|------------|------------|------------|------------|
| ENSG000000127922.9_SEM1         | SEM1         | SEM1 26S proteasome complex subunit                         | HGNC:10845 | 7q21.3       | 0.54537583 | 5.33551729 | 3.65157309 | 0.00160882 | 0.0351502  | -1.2277263 |
| ENSG000000106588.11_PSMa2       | PSMA2        | proteasome 20S subunit alpha 2                              | HGNC:9531  | 7p14.1       | 0.49583619 | 5.85545577 | 3.65189783 | 0.00160761 | 0.0351502  | -1.2284325 |
| ENSG000000038382.20_TRIO        | TRIO         | trio Rho guanine nucleotide exchange factor                 | HGNC:12303 | 5p15.2       | -0.5905899 | 5.01859016 | -3.6495042 | 0.00161655 | 0.03518132 | -1.2294972 |
| ENSG000000256646.7_AC010132.3   | AC010132.3   |                                                             |            |              | 2.5991209  | 1.37281368 | 3.56958927 | 0.00194481 | 0.03885449 | -1.2308256 |
| ENSG000000102898.12_NUTF2       | NUTF2        | nuclear transport factor 2                                  | HGNC:13722 | 16q22.1      | 0.42741618 | 5.24204284 | 3.64694261 | 0.00162616 | 0.0352399  | -1.2373687 |
| ENSG000000124570.19_SERPINB6    | SERPINB6     | serpin family B member 6                                    | HGNC:8950  | 6p25.2       | 0.43491763 | 6.05500984 | 3.64691264 | 0.00162628 | 0.0352399  | -1.2391451 |
| ENSG000000124126.14_PREX1       | PREX1        | phosphatidylinositol-3,4,5-trisphosphate dependent Rac exch | HGNC:32594 | 20q13.13     | -0.7087867 | 3.50992325 | -3.6180943 | 0.00173846 | 0.03642773 | -1.2396047 |
| ENSG000000161896.12_IP6K3       | IP6K3        | inositol hexakisphosphate kinase 3                          | HGNC:17269 | 6p21.31      | 0.51632226 | 5.80120684 | 3.6455246  | 0.00163151 | 0.03530234 | -1.2423098 |
| ENSG000000253636.1_AC022893.1   | AC022893.1   |                                                             |            |              | 0.79745672 | 0.50089824 | 3.574492   | 0.0019229  | 0.03871358 | -1.2423234 |
| ENSG000000159352.15_PSMd4       | PSMD4        | proteasome 26S subunit, non-ATPase 4                        | HGNC:9561  | 1q21.3       | 0.53857623 | 7.07735619 | 3.64240012 | 0.00164336 | 0.03538318 | -1.2457292 |
| ENSG000000119878.5_CRIPT        | CRIP1        | CXXC repeat containing interactor of PDZ3 domain            | HGNC:14312 | 2p21         | 0.56256902 | 3.30866483 | 3.6076176  | 0.00178112 | 0.03694032 | -1.2469061 |
| ENSG000000145982.12_FARS2       | FARS2        | phenylalanyl-tRNA synthetase 2, mitochondrial               | HGNC:21062 | 6p25.1       | 0.47540868 | 3.4122741  | 3.61066207 | 0.00176862 | 0.03673187 | -1.2474072 |
| ENSG000000168952.15_STXBP6      | STXBP6       | syntaxin binding protein 6                                  | HGNC:19666 | 14q11.2      | -0.8334809 | 0.77089705 | -3.5525678 | 0.00202281 | 0.03973999 | -1.24991   |
| ENSG000000173660.12_UQCRH       | UQCRH        | ubiquinol-cytochrome c reductase hinge protein              | HGNC:12590 | 1p33         | 0.64287307 | 7.15382196 | 3.63696932 | 0.00166415 | 0.0356485  | -1.2502222 |
| ENSG000000162654.9_GBP4         | GBP4         | guanylate binding protein 4                                 | HGNC:20480 | 1p22.2       | -0.9928725 | 2.93611647 | -3.5829959 | 0.00188547 | 0.03841394 | -1.263182  |
| ENSG000000102302.8_FGD1         | FGD1         | FYVE, RhoGEF and PH domain containing 1                     | HGNC:3663  | Xp11.22      | -1.4470776 | -0.6184257 | -3.6742591 | 0.00152645 | 0.03441982 | -1.265356  |
| ENSG000000136114.17_THSD1       | THSD1        | thrombospondin type 1 domain containing 1                   | HGNC:17754 | 13q14.3      | -0.9103713 | 1.63320252 | -3.5466681 | 0.00205056 | 0.03997699 | -1.2656961 |
| ENSG000000116898.12_MRPS15      | MRPS15       | mitochondrial ribosomal protein S15                         | HGNC:14504 | 1p34.3       | 0.50012001 | 6.3700784  | 3.63159354 | 0.00168499 | 0.03578814 | -1.2720781 |
| ENSG000000094963.14_FMO2        | FMO2         | flavin containing dimethylaniline monooxygenase 2           | HGNC:3770  | 1q24.3       | -0.9601473 | 3.11352201 | -3.5949727 | 0.00183398 | 0.03772181 | -1.2745338 |
| ENSG000000198890.8_PRMT6        | PRMT6        | protein arginine methyltransferase 6                        | HGNC:18241 | 1p13.3       | -0.6483038 | 0.94727666 | -3.5390557 | 0.00208692 | 0.04001704 | -1.2787517 |
| ENSG000000169020.10_ATP5ME      | ATP5ME       | ATP synthase membrane subunit e                             | HGNC:846   | 4p16.3       | 0.78419438 | 6.5098115  | 3.62832677 | 0.00169778 | 0.03892048 | -1.2788339 |
| ENSG000000170340.11_B3GNT2      | B3GNT2       | UDP-GlcNAc:betaGal beta-1,3-N-acetylglucosaminyltransferas  | HGNC:15629 | 2p15         | -0.9531465 | 0.55999191 | -3.5450638 | 0.00205817 | 0.03997699 | -1.2808631 |
| ENSG000000076108.11_BAZ2A       | BAZ2A        | bromodomain adjacent to zinc finger domain 2A               | HGNC:962   | 12q13.3      | -0.4753425 | 5.1175468  | -3.6256957 | 0.00170815 | 0.03612652 | -1.282659  |
| ENSG000000133110.15_POSTN       | POSTN        | periostin                                                   | HGNC:16953 | 13q13.3      | -1.7769362 | 0.97818778 | -3.5331071 | 0.00211577 | 0.04026143 | -1.2868681 |
| ENSG000000170004.16_CHD3        | CHD3         | chromodomain helicase DNA binding protein 3                 | HGNC:1918  | 17p13.1      | -0.8851593 | 3.76724468 | -3.6023062 | 0.00180314 | 0.0371912  | -1.2900801 |
| ENSG000000181007.8_ZFP82        | ZFP82        | ZFP82 zinc finger protein                                   | HGNC:28682 | 19q13.12     | 0.88296839 | 0.01397242 | 3.58006704 | 0.00189828 | 0.03857009 | -1.2956973 |
| ENSG000000272414.6_FAM47E-STBD1 | FAM47E-STBD1 | FAM47E-STBD1 readthrough                                    | HGNC:44667 | 4q21.1       | 0.95895833 | 4.57604423 | 3.61244092 | 0.00176135 | 0.03668262 | -1.2974373 |
| ENSG000000143570.18_SLC39A1     | SLC39A1      | solute carrier family 39 member 1                           | HGNC:12876 | 1p21.3       | -0.3946442 | 4.36237402 | -3.6112287 | 0.0017663  | 0.03673187 | -1.2989215 |
| ENSG000000245910.8_SNHG6        | SNHG6        | small nucleolar RNA host gene 6                             | HGNC:32965 | 8q13.1       | 0.5421526  | 6.42032093 | 3.61846009 | 0.00173699 | 0.03642773 | -1.3007286 |
| ENSG000000134013.15_LOXL2       | LOXL2        | lysyl oxidase like 2                                        | HGNC:6666  | 8p21.3       | -1.2732017 | 1.66505405 | -3.5287452 | 0.00213718 | 0.04056584 | -1.3037047 |
| ENSG000000182963.10_GJC1        | GJC1         | gap junction protein gamma 1                                | HGNC:4280  | 17q21.31     | -0.8307326 | 2.0876495  | -3.5377308 | 0.00209331 | 0.04003776 | -1.3090434 |
| ENSG000000167526.13_RPL13       | RPL13        | gap junction protein delta 3                                | HGNC:19147 | 17q21.2      | 0.54748989 | 9.54258348 | 3.59440021 | 0.00183641 | 0.03772181 | -1.3159082 |
| ENSG000000126749.16_EMG1        | EMG1         | ribosomal protein L13                                       | HGNC:10303 | 16q24.3      | 0.45079029 | 4.52570043 | 3.60459523 | 0.00179361 | 0.03708041 | -1.3162851 |
| ENSG000000260260.1_SNHG19       | SNHG19       | EMG1 N1-specific pseudouridine methyltransferase            | HGNC:16912 | 12p13.31     | 0.86862379 | 2.61940697 | 3.54850124 | 0.0020419  | 0.03991387 | -1.3163166 |
| ENSG000000254539.1_AC239804.1   | AC239804.1   | small nucleolar RNA host gene 19                            | HGNC:49574 | 16p13.3      | 0.84534344 | 3.20528351 | 3.56802245 | 0.00195186 | 0.03892048 | -1.3191788 |
| ENSG000000108387.14_SEPT4       | SEPT4        | septin-4                                                    |            |              | -0.5554594 | 2.15346901 | -3.5364303 | 0.0020996  | 0.04005835 | -1.3197854 |
| ENSG000000077713.19_SLC25A43    | SLC25A43     | solute carrier family 25 member 43                          | HGNC:30557 | Xq24         | -1.0987835 | 0.10976398 | -3.5523298 | 0.00202392 | 0.03973999 | -1.3199732 |
| ENSG000000157240.3_FZD1         | FZD1         | frizzled class receptor 1                                   | HGNC:4038  | 7q21.13      | -0.67504   | 2.3892884  | -3.5436538 | 0.00206488 | 0.04001704 | -1.3211334 |
| ENSG000000154124.4_OTULIN       | OTULIN       | OTU deubiquitinase with linear linkage specificity          | HGNC:25118 | 5p15.2       | 0.4952086  | 2.77867472 | 3.55308454 | 0.0020204  | 0.03973999 | -1.3218723 |
| ENSG000000183853.18_KIRREL1     | KIRREL1      | kirre like nephrin family adhesion molecule 1               | HGNC:15734 | 1q23.1       | -1.0346957 | 2.54447206 | -3.5459885 | 0.00205378 | 0.03997699 | -1.3260624 |
| ENSG000000034713.8_GABARAPL2    | GABARAPL2    | GABA type A receptor associated protein like 2              | HGNC:13291 | 16q23.1      | 0.39477644 | 5.99326456 | 3.60622453 | 0.00178687 | 0.03700836 | -1.3282166 |
| ENSG000000091136.14_LAMB1       | LAMB1        | laminin subunit beta 1                                      | HGNC:6486  | 7q31.1       | -0.8203223 | 3.98233452 | -3.5880306 | 0.00186365 | 0.03817689 | -1.3359772 |
| ENSG00000006118.14_TMEM132A     | TMEM132A     | transmembrane protein 132A                                  | HGNC:31092 | 11q12.2      | -1.0914835 | 1.14101365 | -3.5072293 | 0.00224594 | 0.04183588 | -1.3378356 |
| ENSG000000230561.4_CDCC192      | CDCC192      | coiled-coil domain containing 192                           | HGNC:49566 | 5q23.2-q23.3 | 1.46603698 | -0.6922611 | 3.66033149 | 0.00157651 | 0.0348156  | -1.3427567 |
| ENSG000000188739.15_RBM34       | RBM34        | RNA binding motif protein 34                                | HGNC:28965 | 1q42.3       | 0.44890126 | 3.75097753 | 3.57402323 | 0.00192498 | 0.03871358 | -1.3528853 |
| ENSG000000128524.5_ATP6V1F      | ATP6V1F      | ATPase H+ transporting V1 subunit F                         | HGNC:16832 | 7q32.1       | 0.49265592 | 5.1479467  | 3.59196974 | 0.00184676 | 0.03788251 | -1.3565733 |
| ENSG000000104529.17_EEF1D       | EEF1D        | eukaryotic translation elongation factor 1 delta            | HGNC:3211  | 8q24.3       | 0.45961393 | 8.27782362 | 3.58374578 | 0.00188221 | 0.03839958 | -1.3614852 |
| ENSG000000140259.7_MFAP1        | MFAP1        | microfibril associated protein 1                            | HGNC:7032  | 15q15.3      | 0.50377607 | 4.08607004 | 3.57353752 | 0.00192715 | 0.03871358 | -1.3689603 |
| ENSG000000120333.4_MRPS14       | MRPS14       | mitochondrial ribosomal protein S14                         | HGNC:14049 | 1q25.1       | 0.48235223 | 3.53084206 | 3.55787456 | 0.00199817 | 0.03964419 | -1.371463  |
| ENSG000000152082.14_MZT2B       | MZT2B        | mitotic spindle organizing protein 2B                       | HGNC:25886 | 2q21.1       | 0.53928753 | 5.91112033 | 3.58603687 | 0.00187226 | 0.03830095 | -1.3723031 |
| ENSG000000230910.3_AL391807.1   | AL391807.1   |                                                             |            |              | -1.7788711 | -0.8762278 | -3.6595998 | 0.00157919 | 0.03482337 | -1.3748821 |
| ENSG000000172336.5_POP7         | POP7         | POP7 homolog, ribonuclease P/MRP subunit                    | HGNC:19949 | 7q22.1       | 0.44005989 | 4.30697389 | 3.57408414 | 0.00192471 | 0.03871358 | -1.375814  |
| ENSG000000150712.11_TMTR12      | TMTR12       | myotubularin related protein 12                             | HGNC:18191 | 5p13.3       | -0.7851516 | 2.66081714 | -3.5259948 | 0.00215079 | 0.04061847 | -1.3762461 |
| ENSG000000224470.8_ATXN1L       | ATXN1L       | ataxin 1 like                                               | HGNC:33279 | 16q22.2      | -0.4890117 | 4.38589029 | -3.5768111 | 0.00191262 | 0.03870411 | -1.3765243 |
| ENSG000000185973.11_TMLHE       | TMLHE        | trimethyllysine hydroxylase, epsilon                        | HGNC:18308 | Xq28         | 0.59568822 | 4.57011572 | 3.57687718 | 0.00191233 | 0.03870411 | -1.376526  |
| ENSG000000116288.13_PARK7       | PARK7        | Parkinsonism associated deglycase                           | HGNC:16369 | 1p36.23      | 0.51866811 | 7.65645955 | 3.58027689 | 0.00189736 | 0.03857009 | -1.3770625 |
| ENSG000000130702.15_LAMA5       | LAMA5        | laminin subunit alpha 5                                     | HGNC:6485  | 20q13.33     | -0.9932167 | 4.55181454 | -3.5734528 | 0.00192752 | 0.03871358 | -1.3846271 |
| ENSG000000160460.16_SPTBN4      | SPTBN4       | spectrin beta, non-erythrocytic 4                           | HGNC:14896 | 19q13.2      | -0.6289731 | 2.91852397 | -3.527336  | 0.00214414 | 0.04058444 | -1.3891535 |
| ENSG000000184924.5_PTRHD1       | PtrHD1       | peptidyl-tRNA hydrolase domain containing 1                 | HGNC:33782 | 2p23.3       | 0.54703327 | 3.65668389 | 3.55390395 | 0.00201658 | 0.03973999 | -1.3894873 |
| ENSG000000134871.18_COL4A2      | COL4A2       | collagen type IV alpha 2 chain                              | HGNC:2203  | 13q34        | -1.1592723 | 5.685938   | -3.572596  | 0.00193134 | 0.03871725 | -1.4000095 |
| ENSG000000115685.15_PPP1R7      | PPP1R7       | protein phosphatase 1 regulatory subunit 7                  | HGNC:9295  | 2q37.3       | 0.45622673 | 5.13222199 | 3.57150458 | 0.00193622 | 0.03876321 | -1.4012165 |
| ENSG000000115306.16_SPTBN1      | SPTBN1       | spectrin beta, non-erythrocytic 1                           | HGNC:11275 | 2p16.2       | -0.5464711 | 6.79722656 | -3.5693327 | 0.00194596 | 0.03885449 | -1.4052066 |
| ENSG000000164182.11_NDUFAF2     | NDUFAF2      | NADH:ubiquinone oxidoreductase complex assembly factor 2    | HGNC:28086 | 5q12.1       | 0.53650737 | 3.57958197 | 3.54083946 | 0.00207834 | 0.04001704 | -1.4086727 |
| ENSG000000136305.11_CIDEb       | CIDEb        | cell death inducing DFFA like effector b                    | HGNC:1977  | 14q12        | -1.5287006 | -0.4424468 | -3.5413662 | 0.00207582 | 0.04001704 | -1.4110315 |
| ENSG000000100139.13_MICALL1     | MICALL1      | MICAL like 1                                                | HGNC:29804 | 22q13.1      | -0.7942622 | 3.08029797 | -3.5230643 | 0.00216538 | 0.04082574 | -1.4114914 |
| ENSG000000283632.2_EXOC3l2      | EXOC3l2      | exocyst complex component 3 like 2                          | HGNC:30162 | 19q13.32     | -2.150248  | -1.3720949 | -3.7080152 | 0.00141157 | 0.03290351 | -1.412929  |
| ENSG000000144857.14_BOC         | BOC          | BOC cell adhesion associated, oncogene regulated            | HGNC:17173 | 3q13.2       | -0.7656062 | 2.61409446 | -3.5062297 | 0.00225113 | 0.04188042 | -1.4152304 |
| ENSG00000010327.10_STAB1        | STAB1        | stabilin 1                                                  | HGNC:18628 | 3p21.1       | -1.2017895 | 4.03412184 | -3.5487071 | 0.00204093 | 0.03991387 | -1.4162008 |
| ENSG000000180155.20_LYNX1       | LYNX1        | Ly6/neurotoxin 1                                            | HGNC:29604 | 8q24.3       | -0.9404222 | 2.37648719 | -3.4943119 | 0.00231384 | 0.04253546 | -1.4162568 |
| ENSG000000204681.11_GABBR1      | GABBR1       | gamma-aminobutyric acid type B receptor subunit 1           | HGNC:4070  | 6p22.1       | -0.6429992 | 3.6961436  | -3.5338971 | 0.00211192 | 0.04023914 | -1.4174945 |
| ENSG000000136237.18_RAPGEF5     | RAPGEF5      | Rap guanine nucleotide exchange factor 5                    | HGNC:16862 | 7p15.3       | -0.8061684 | 1.29408999 | -3.4681228 | 0.00245776 | 0.04394212 | -1.4196258 |
| ENSG000000238142.1_BX284668.5   | BX284668.5   |                                                             |            |              | 1.49985883 | 0.44759448 | 3.49205605 | 0.0023259  | 0.04253546 | -1.4216386 |
| ENSG000000108107.14_RPL28       | RPL28        | ribosomal protein L28                                       | HGNC:10330 | 19q13.42     | 0.53200916 | 7.64743387 | 3.55861345 | 0.00199476 | 0.03964419 | -1.4243266 |
| ENSG000000279833.1_AL031846.2   | AL031846.2   |                                                             |            |              | -1.2618287 | 0.32519887 | -3.4807949 | 0.00238705 | 0.04320296 | -1.4275919 |
| ENSG000000187210.14_GCNT1       | GCNT1        | glucosaminyl (N-acetyl) transferase 1                       | HGNC:4203  | 9q21.13      | -1.4274485 | -0.896929  | -3.6131039 | 0.00175865 | 0.03667734 | -1.428676  |
| ENSG000000165792.17_METTL17     | METTL17      | methyltransferase like 17                                   | HGNC:19280 | 14q          |            |            |            |            |            |            |

|                                 |               |                                                                |            |              |            |            |            |            |             |            |
|---------------------------------|---------------|----------------------------------------------------------------|------------|--------------|------------|------------|------------|------------|-------------|------------|
| ENSG00000128791.12_TWSG1        | TWSG1         | twisted gastrulation BMP signaling modulator 1                 | HGNC:12429 | 18p11.22     | -0.4596603 | 2.19770727 | -3.4657686 | 0.00247112 | 0.04395542  | -1.472208  |
| ENSG00000178980.15_SELENOW      | SELENOW       | selenoprotein W                                                | HGNC:10752 | 19q13.33     | 0.50595067 | 8.86241287 | 3.52764437 | 0.00214262 | 0.04058444  | -1.4727115 |
| ENSG00000126768.12_TIMM17B      | TIMM17B       | translocase of inner mitochondrial membrane 17B                | HGNC:17310 | Xp11.23      | 0.44582249 | 5.32222803 | 3.53917131 | 0.00208636 | 0.04001704  | -1.4727614 |
| ENSG00000173402.11_DAG1         | DAG1          | dystroglycan 1                                                 | HGNC:2666  | 3p21.31      | -0.4222179 | 7.07488713 | -3.537725  | 0.00209334 | 0.04003776  | -1.4734017 |
| ENSG00000072864.15_NDE1         | NDE1          | nudE neurodevelopment protein 1                                | HGNC:17619 | 16p13.11     | -0.684627  | 1.78880413 | -3.445352  | 0.00259003 | 0.04485036  | -1.4818099 |
| ENSG00000184584.13_TMEM173      | TMEM173       | stimulator of interferon response cGAMP interactor 1           | HGNC:27962 | 5q31.2       | -0.77035   | 2.99577674 | -3.4888247 | 0.00234329 | 0.04269456  | -1.4843604 |
| ENSG00000178726.6_THBD          | THBD          | thrombomodulin                                                 | HGNC:11784 | 20p11.21     | -0.7792397 | 3.24268887 | -3.4957671 | 0.00230609 | 0.04253546  | -1.4850775 |
| ENSG00000115705.21_TPO          | TPO           | thyroid peroxidase                                             | HGNC:12015 | 2p25.3       | -1.1237871 | 1.42498309 | -3.4344797 | 0.00265562 | 0.04556185  | -1.4857821 |
| ENSG00000004866.20_ST7          | ST7           | suppression of tumorigenicity 7                                | HGNC:11351 | 7q31.2       | 0.46613068 | 3.18976397 | 3.49262036 | 0.00232288 | 0.04253546  | -1.48842   |
| ENSG00000214050.8_FBXO16        | FBXO16        | F-box protein 16                                               | HGNC:13618 | 8p21.1       | 2.08637818 | -1.3090069 | 3.72927546 | 0.00134365 | 0.0318635   | -1.4902388 |
| ENSG00000156467.9_UQCRB         | UQCRB         | ubiquinol-cytochrome c reductase binding protein               | HGNC:12582 | 8q22.1       | 0.59319072 | 8.62639791 | 3.52107131 | 0.00217536 | 0.04090773  | -1.4909335 |
| ENSG00000013288.8_MAN2B2        | MAN2B2        | mannosidase alpha class 2B member 2                            | HGNC:29623 | 4p16.1       | -0.9019641 | 2.47851142 | -3.4643969 | 0.00247894 | 0.04396425  | -1.4946481 |
| ENSG00000183621.15_ZNF438       | ZNF438        | zinc finger protein 438                                        | HGNC:21029 | 10p11.23     | 0.40457624 | 3.3858143  | 3.4936568  | 0.00231734 | 0.04253546  | -1.5003432 |
| ENSG00000184635.15_ZNF93        | ZNF93         | zinc finger protein 93                                         | HGNC:13169 | 19p12        | 1.34737797 | 0.02698673 | 3.47331577 | 0.04242854 | 0.04366416  | -1.5135428 |
| ENSG00000090013.10_BLVRB        | BLVRB         | biliverdin reductase B                                         | HGNC:1063  | 19q13.2      | 0.40156661 | 5.93148847 | 3.5207417  | 0.00217702 | 0.04090773  | -1.5145593 |
| ENSG00000119681.12_LTBP2        | LTBP2         | latent transforming growth factor beta binding protein 2       | HGNC:6715  | 14q24.3      | -0.9298737 | 4.62805611 | -3.51493   | 0.0022064  | 0.041330461 | -1.5157035 |
| ENSG00000136819.15_C9orf78      | C9orf78       | chromosome 9 open reading frame 78                             | HGNC:24932 | 9q34.11      | 0.36922457 | 5.00737865 | 3.51762423 | 0.00219273 | 0.0411      | -1.517181  |
| ENSG00000281490.1_CICP14        | CICP14        | capicua transcriptional repressor pseudogene 14                | HGNC:38542 | 7q32.1       | -0.6674747 | 3.21855535 | -3.4747916 | 0.0024203  | 0.04356822  | -1.5172934 |
| ENSG00000100644.17_HIF1A        | HIF1A         | hypoxia inducible factor 1 subunit alpha                       | HGNC:4910  | 14q23.2      | -0.5564098 | 2.64485315 | -3.4590346 | 0.00250973 | 0.04417068  | -1.518977  |
| ENSG00000229644.6_NAMPTP1       | NAMPTP1       | nicotinamide phosphoribosyltransferase pseudogene 1            | HGNC:17633 | 10p11.21     | 2.05583513 | -0.450774  | 3.52690413 | 0.00214628 | 0.04058444  | -1.5191534 |
| ENSG00000241990.5_PRR34-AS1     | PRR34-AS1     | PRR34 antisense RNA 1                                          | HGNC:50499 | 22q13.31     | 0.66586683 | 3.8163152  | 3.49480767 | 0.0023112  | 0.04253546  | -1.5212582 |
| ENSG00000183943.5_PRKX          | PRKX          | protein kinase X-linked                                        | HGNC:9441  | Xp22.33      | -0.7147969 | 0.85832261 | -3.4141348 | 0.00278279 | 0.04685775  | -1.522122  |
| ENSG00000140406.3_TLNRD1        | TLNRD1        | talin rod domain containing 1                                  | HGNC:13519 | 15q25.1      | -1.1522864 | 1.64820865 | -3.4200711 | 0.00274508 | 0.04665318  | -1.5246593 |
| ENSG00000171530.14_TBCA         | TBCA          | tubulin folding cofactor A                                     | HGNC:11579 | 5q14.1       | 0.59857331 | 4.56460728 | 3.50914862 | 0.00223602 | 0.04170292  | -1.524806  |
| ENSG00000278974.1_AC093909.6    | AC093909.6    |                                                                |            |              | 0.74592889 | 1.47770229 | 3.41464098 | 0.00277955 | 0.04685775  | -1.5262295 |
| ENSG00000163634.12_THOC7        | THOC7         | THO complex 7                                                  | HGNC:29874 | 3p14.1       | 0.52134209 | 4.7970419  | 3.5109573  | 0.00222671 | 0.04163288  | -1.5274993 |
| ENSG00000100600.17_MFNG         | MFNG          | MFNG O-fucosylpeptide 3-beta-N-acetylglucosaminyltransferase   | HGNC:7038  | 22q13.1      | -0.6695767 | 1.85089134 | -3.4254808 | 0.00271115 | 0.04619737  | -1.5307766 |
| ENSG00000268713.1_AC005261.3    | AC005261.3    |                                                                |            |              | 1.16527869 | -0.3021762 | 3.47926488 | 0.00239548 | 0.04322532  | -1.5309886 |
| ENSG00000054598.8_FOXC1         | FOXC1         | forkhead box C1                                                | HGNC:3800  | 6p25.3       | -0.933152  | 0.75323734 | -3.4098793 | 0.00281013 | 0.04685775  | -1.5330025 |
| ENSG00000233297.4_RASA4DP       | RASA4DP       | RAS p21 protein activator 4CD, pseudogene                      | HGNC:44226 | 7q22.1       | 3.65375689 | 1.94290564 | 3.41335632 | 0.00278777 | 0.04685775  | -1.5346006 |
| ENSG00000078018.19_MAP2         | MAP2          | microtubule associated protein 2                               | HGNC:6839  | 2q34         | -0.8765788 | 0.27929105 | -3.4157661 | 0.00277238 | 0.04685775  | -1.537047  |
| ENSG00000081803.16_CADPS2       | CADPS2        | calcium dependent secretion activator 2                        | HGNC:16018 | 7q31.32      | -0.9347787 | 0.42331661 | -3.4112311 | 0.00280142 | 0.04685775  | -1.5444692 |
| ENSG00000168546.11_GFRA2        | GFRA2         | GDNF family receptor alpha 2                                   | HGNC:4244  | 8p21.3       | -2.1209706 | -0.8482229 | -3.5289738 | 0.00213605 | 0.04056584  | -1.5461122 |
| ENSG00000139926.15_FRMD6        | FRMD6         | FERM domain containing 6                                       | HGNC:19839 | 14q22.1      | -1.1085881 | 2.48000949 | -3.4363726 | 0.00264409 | 0.04546796  | -1.5496637 |
| ENSG00000128578.10_STRIP2       | STRIP2        | striatin interacting protein 2                                 | HGNC:22209 | 7q32.1       | 0.5831686  | 5.34662681 | 3.50260134 | 0.00227004 | 0.04217996  | -1.5526818 |
| ENSG00000136010.14_ALDH1L2      | ALDH1L2       | aldehyde dehydrogenase 1 family member L2                      | HGNC:26777 | 12q23.3      | -0.7375819 | 0.39325365 | -3.4026643 | 0.0028571  | 0.04692616  | -1.5553848 |
| ENSG00000135940.6_COX5B         | COX5B         | cytochrome c oxidase subunit 5B                                | HGNC:2269  | 2q11.2       | 0.57186688 | 8.61673123 | 3.49049598 | 0.00233428 | 0.04262472  | -1.5575637 |
| ENSG00000198046.12_ZNF667       | ZNF667        | zinc finger protein 667                                        | HGNC:28854 | 19q13.43     | 0.78933548 | 0.58581963 | 3.40273452 | 0.00285668 | 0.04692616  | -1.5586784 |
| ENSG00000166171.13_DPCD         | DPD           | deleted in primary ciliary dyskinesia homolog (mouse)          | HGNC:24542 | 10q24.32     | 0.58233101 | 1.89937757 | 3.40939917 | 0.00281324 | 0.04685775  | -1.5596053 |
| ENSG00000137970.7_RPL7P9        | RPL7P9        | ribosomal protein L7 pseudogene 9                              | HGNC:37028 | 1p21.3       | 0.77880509 | 0.75385315 | 3.39742318 | 0.0028917  | 0.04714227  | -1.5598586 |
| ENSG00000094916.16_CBX5         | CBX5          | chromobox 5                                                    | HGNC:1555  | 12q13.13     | 0.40581366 | 4.62567356 | 3.49396545 | 0.00231569 | 0.04253546  | -1.5601301 |
| ENSG00000100764.14_PSMC1        | PSMC1         | proteasome 26S subunit, ATPase 1                               | HGNC:9547  | 14q32.11     | 0.49649124 | 7.01730287 | 3.49777566 | 0.00229544 | 0.04249391  | -1.561127  |
| ENSG00000074071.14_MRPS34       | MRPS34        | mitochondrial ribosomal protein S34                            | HGNC:16618 | 16p13.3      | 0.49298313 | 5.59349605 | 3.49872662 | 0.00229041 | 0.04245326  | -1.562047  |
| ENSG00000151789.12_ZNF385D      | ZNF385D       | zinc finger protein 385D                                       | HGNC:26191 | 3p24.3       | -0.9760216 | 0.19777233 | -3.4115894 | 0.00279911 | 0.04685775  | -1.5624014 |
| ENSG00000155304.6_HSPA13        | HSPA13        | heat shock protein family A (Hsp70) member 13                  | HGNC:11375 | 21q11.2      | -0.6447556 | 1.30760529 | -3.396379  | 0.00289864 | 0.04714227  | -1.5627988 |
| ENSG00000127863.15_TNFRSF19     | TNFRSF19      | TNF receptor superfamily member 19                             | HGNC:11915 | 13q12.12     | -1.4126836 | 0.63978384 | -3.3966097 | 0.00289711 | 0.04714227  | -1.5636467 |
| ENSG00000167088.11_SNRPD1       | SNRPD1        | small nuclear ribonucleoprotein D1 polypeptide                 | HGNC:11158 | 18q11.2      | 0.43735471 | 4.06002992 | 3.4833483  | 0.00237305 | 0.04302766  | -1.5636495 |
| ENSG00000144366.16_GULP1        | GULP1         | GULP PTB domain containing engulfment adaptor 1                | HGNC:18649 | 2q32.1-q32.2 | -0.8025148 | 1.41626403 | -3.3987013 | 0.00288323 | 0.04714227  | -1.5665285 |
| ENSG00000196639.6_HRH1          | HRH1          | histamine receptor H1                                          | HGNC:5182  | 3p23.5       | -1.0995685 | 0.07685932 | -3.4031039 | 0.00285422 | 0.04692616  | -1.5669736 |
| ENSG00000042753.11_AP2S1        | AP2S1         | adaptor related protein complex 2 subunit sigma 1              | HGNC:565   | 19q13.32     | 0.44618319 | 4.88235032 | 3.49317574 | 0.00231991 | 0.04253546  | -1.566989  |
| ENSG00000137509.11_PRCP         | PRCP          | prolylcarboxypeptidase                                         | HGNC:9344  | 11q14        | -0.7356431 | 3.22226871 | -3.4577017 | 0.00251744 | 0.04425448  | -1.5674863 |
| ENSG00000122707.12_RECK         | RECK          | reversion inducing cysteine rich protein with kazal motifs     | HGNC:11345 | 9p13.3       | -0.9634089 | 1.77053317 | -3.4042221 | 0.0028469  | 0.04692616  | -1.5711163 |
| ENSG00000135624.16_CCT7         | CCT7          | chaperonin containing TCP1 subunit 7                           | HGNC:1622  | 2p13.2       | 0.41593295 | 7.324844   | 3.49202887 | 0.00232605 | 0.04253546  | -1.5714701 |
| ENSG00000164258.12_NDUFS4       | NDUFS4        | NADH:ubiquinone oxidoreductase subunit S4                      | HGNC:7711  | 5q11.2       | 0.57054916 | 6.19292209 | 3.49294465 | 0.00232114 | 0.04253546  | -1.5745358 |
| ENSG00000164930.12_FZD6         | FZD6          | frizzled class receptor 6                                      | HGNC:4044  | 8q22.3       | -0.8794611 | 0.67069104 | -3.3851614 | 0.00297427 | 0.04775065  | -1.5817585 |
| ENSG00000127184.13_COX7C        | COX7C         | cytochrome c oxidase subunit 7C                                | HGNC:2292  | 5q14.3       | 0.63577325 | 8.71409977 | 3.4782756  | 0.00240095 | 0.04327188  | -1.5821516 |
| ENSG00000102034.16_ELF4         | ELF4          | E74 like ETS transcription factor 4                            | HGNC:3319  | Xq26.1       | -1.2212524 | 0.91261012 | -3.3830164 | 0.00298895 | 0.04788379  | -1.5833383 |
| ENSG00000065518.8_NDUFB4        | NDUFB4        | NADH:ubiquinone oxidoreductase subunit B4                      | HGNC:7699  | 3q13.33      | 0.47684005 | 7.4457413  | 3.48448538 | 0.00236684 | 0.04301572  | -1.5867396 |
| ENSG00000162430.17_SELENON      | SELENON       | selenoprotein N                                                | HGNC:15999 | 1p36.11      | -0.7028536 | 4.68094261 | -3.4805165 | 0.00238858 | 0.04320296  | -1.5903625 |
| ENSG00000130598.16_TNNI2        | TNNI2         | troponin I2, fast skeletal type                                | HGNC:11946 | 11p15.5      | 0.88596496 | 11.6986805 | 3.45182895 | 0.00255171 | 0.04462432  | -1.590937  |
| ENSG00000215769.8_ARHGAP27P1-BF | ARHGAP27P1-BF | ARHGAP27P1-BPTFP1-KPNA2:P3 readthrough, transcribed pseudogene | HGNC:52873 | 17q24.1      | -0.6074297 | 1.79511897 | -3.3909281 | 0.00293515 | 0.04739373  | -1.5922897 |
| ENSG00000198373.12_WWP2         | WWP2          | WW domain containing E3 ubiquitin protein ligase 2             | HGNC:16804 | 16q22.1      | -0.4933536 | 3.88396166 | -3.4641387 | 0.00248041 | 0.04396425  | -1.5938701 |
| ENSG00000158966.15_CACHD1       | CACHD1        | cache domain containing 1                                      | HGNC:29314 | 1p31.3       | -0.6006169 | 1.37694891 | -3.3812216 | 0.00300128 | 0.04797891  | -1.5953195 |
| ENSG00000127947.16_PTPN12       | PTPN12        | protein tyrosine phosphatase non-receptor type 12              | HGNC:9645  | 7q11.23      | -0.513049  | 3.78017921 | -3.4607051 | 0.0025001  | 0.04410466  | -1.600277  |
| ENSG00000054179.12_ENTPD2       | ENTPD2        | ectonucleoside triphosphate diphosphohydrolase 2               | HGNC:3364  | 9q34.3       | -1.4481154 | -0.6716554 | -3.484319  | 0.00236775 | 0.04301572  | -1.600992  |
| ENSG00000126746.17_ZNF384       | ZNF384        | zinc finger protein 384                                        | HGNC:11955 | 12p13.31     | -0.5726003 | 3.4901916  | -3.4500469 | 0.00256219 | 0.04468334  | -1.601653  |
| ENSG00000184752.13_NDUFA12      | NDUFA12       | NADH:ubiquinone oxidoreductase subunit A12                     | HGNC:23987 | 12q22        | 0.48475568 | 6.3981886  | 3.48001211 | 0.00239136 | 0.04320296  | -1.6020955 |
| ENSG00000231500.7_RPS18         | RPS18         | ribosomal protein S18                                          | HGNC:10401 | 6p21.32      | 0.56263759 | 8.91580979 | 3.46603528 | 0.0024696  | 0.04395542  | -1.6042965 |
| ENSG00000153933.10_DGKE         | DGKE          | diacylglycerol kinase epsilon                                  | HGNC:2852  | 17q22        | -0.8255502 | 0.7497022  | -3.37289   | 0.00305921 | 0.04854268  | -1.6052025 |
| ENSG00000144891.17_AGTR1        | AGTR1         | angiotensin II receptor type 1                                 | HGNC:336   | 3q24         | -0.8107336 | 2.10453213 | -3.3980042 | 0.00288785 | 0.04714227  | -1.606197  |
| ENSG00000204922.5_UQCC3         | UQCC3         | ubiquinol-cytochrome c reductase complex assembly factor 3     | HGNC:34399 | 11q12.3      | 0.58780827 | 3.87647767 | 3.45630236 | 0.00252557 | 0.04434528  | -1.6074177 |
| ENSG00000286191.1_AL158195.1    | AL158195.1    |                                                                |            |              | 1.87887795 | -0.2524254 | 3.46847153 | 0.00245578 | 0.04394212  | -1.6086489 |
| ENSG00000002834.18_LASP1        | LASP1         | LIM and SH3 protein 1                                          | HGNC:6513  | 17q12        | -0.8046778 | 4.36673506 | -3.4686227 | 0.00245493 | 0.04394212  | -1.6087492 |
| ENSG00000177363.5_LRRN4CL       | LRRN4CL       | LRRN4 C-terminal like                                          | HGNC:33724 | 11q12.3      | -1.1865924 | 1.96313447 | -3.3893638 | 0.00294571 | 0.04739373  | -1.6088984 |
| ENSG00000114200.10_BCHE         | BCHE          | butyrylcholinesterase                                          | HGNC:983   | 3q26.1       | -1.0433205 | 0.29006334 | -3.3816473 | 0.00299835 | 0.04797891  | -1.6109128 |
| ENSG00000090539.15_CHRD         | CHRD          | chordin                                                        | HGNC:1949  | 3q27.1       | -0.6581293 | 2.34873643 | -3.3995957 | 0.0028773  |             |            |

|                               |            |                                                         |            |          |            |            |            |            |            |            |
|-------------------------------|------------|---------------------------------------------------------|------------|----------|------------|------------|------------|------------|------------|------------|
| ENSG00000164919.11_COX6C      | COX6C      | cytochrome c oxidase subunit 6C                         | HGNC:2285  | 8q22.2   | 0.58359292 | 7.59381356 | 3.44296912 | 0.00260426 | 0.04498956 | -1.6755038 |
| ENSG00000113141.18_IK         | IK         | IK cytokine                                             | HGNC:5958  | 5q31.3   | 0.4387013  | 6.05719965 | 3.44643329 | 0.00258359 | 0.04485036 | -1.6755416 |
| ENSG00000100348.10_TXN2       | TXN2       | thioredoxin 2                                           | HGNC:17772 | 22q12.3  | 0.42606406 | 6.28681855 | 3.44577791 | 0.00258749 | 0.04485036 | -1.6765878 |
| ENSG00000176171.11_BNIP3      | BNIP3      | BCL2 interacting protein 3                              | HGNC:1084  | 10q26.3  | 0.54590794 | 6.59921674 | 3.4453185  | 0.00259022 | 0.04485036 | -1.6766421 |
| ENSG00000175768.13_TOMM5      | TOMM5      | translocase of outer mitochondrial membrane 5           | HGNC:31369 | 9p13.2   | 0.52815952 | 4.88469356 | 3.44166954 | 0.00261206 | 0.04507235 | -1.6786753 |
| ENSG00000145919.10_BOD1       | BOD1       | biorientation of chromosomes in cell division 1         | HGNC:25114 | 5q35.2   | 0.42949159 | 5.24050909 | 3.44325693 | 0.00260254 | 0.04498956 | -1.6808865 |
| ENSG00000183617.5_MRPL54      | MRPL54     | mitochondrial ribosomal protein L54                     | HGNC:16685 | 19p13.3  | 0.55767331 | 3.90563368 | 3.42215074 | 0.00273199 | 0.04649958 | -1.6835455 |
| ENSG00000118855.19_MFSD1      | MFSD1      | major facilitator superfamily domain containing 1       | HGNC:25874 | 3q25.32  | -0.5490838 | 2.89112329 | -3.3927498 | 0.0029229  | 0.04738259 | -1.6838749 |
| ENSG00000185721.12_DRG1       | DRG1       | developmentally regulated GTP binding protein 1         | HGNC:3029  | 22q12.2  | 0.53228015 | 5.7949442  | 3.44016337 | 0.00262113 | 0.04517681 | -1.6892924 |
| ENSG00000125746.16_EML2       | EML2       | EMAP like 2                                             | HGNC:18035 | 19q13.32 | -0.8064347 | 2.07756124 | -3.3513654 | 0.00321398 | 0.04990939 | -1.6897718 |
| ENSG00000148690.12_FRA10AC1   | FRA10AC1   | FRA10A associated CGG repeat 1                          | HGNC:1162  | 10q23.33 | 0.56469311 | 3.58221422 | 3.41061037 | 0.00280542 | 0.04685775 | -1.6905025 |
| ENSG00000133983.15_COX16      | COX16      | cytochrome c oxidase assembly factor COX16              | HGNC:20213 | 14q24.2  | 0.52085232 | 4.54076282 | 3.42780403 | 0.00269671 | 0.04605593 | -1.6997818 |
| ENSG00000104774.13_MAN2B1     | MAN2B1     | mannosidase alpha class 2B member 1                     | HGNC:6826  | 19p13.13 | -0.6801472 | 3.59048014 | -3.405781  | 0.00283672 | 0.04692616 | -1.702435  |
| ENSG00000173226.17_IQCB1      | IQCB1      | IQ motif containing B1                                  | HGNC:28949 | 3q13.33  | 0.44270926 | 2.29976041 | 3.35456778 | 0.00319048 | 0.04982187 | -1.7066835 |
| ENSG00000196498.13_NCOR2      | NCOR2      | nuclear receptor corepressor 2                          | HGNC:7673  | 12q24.31 | -0.5916847 | 6.68467334 | -3.4301521 | 0.00268219 | 0.04586016 | -1.708463  |
| ENSG00000110536.14_PTPMT1     | PTPMT1     | protein tyrosine phosphatase mitochondrial 1            | HGNC:26965 | 11p11.2  | 0.45457571 | 4.026897   | 3.41375107 | 0.00278524 | 0.04685775 | -1.710549  |
| ENSG000000082515.18_MRPL22    | MRPL22     | mitochondrial ribosomal protein L22                     | HGNC:14480 | 5q33.2   | 0.42758078 | 3.91519537 | 3.40480592 | 0.00284308 | 0.04692616 | -1.724172  |
| ENSG00000151491.14_EPS8       | EPS8       | epidermal growth factor receptor pathway substrate 8    | HGNC:3420  | 12p12.3  | -0.4014774 | 3.558273   | -3.3989178 | 0.00288179 | 0.04714227 | -1.7246729 |
| ENSG000000255310.2_AF131215.5 | AF131215.5 |                                                         |            |          | -1.7376898 | -1.8599012 | -3.564561  | 0.00196754 | 0.03918091 | -1.7252381 |
| ENSG00000024862.17_CCDC28A    | CCDC28A    | coiled-coil domain containing 28A                       | HGNC:21098 | 6q24.1   | 0.45069847 | 2.56146994 | 3.35286548 | 0.00320295 | 0.04982187 | -1.7263673 |
| ENSG00000169554.20_ZEB2       | ZEB2       | zinc finger E-box binding homeobox 2                    | HGNC:14881 | 2q22.3   | -0.4405409 | 3.95191866 | -3.4052468 | 0.0028402  | 0.04692616 | -1.7291599 |
| ENSG00000101773.19_RBBP8      | RBBP8      | RB binding protein 8, endonuclease                      | HGNC:9891  | 18q11.2  | -0.8447686 | -0.4547888 | -3.3511954 | 0.00321524 | 0.04990939 | -1.7303017 |
| ENSG00000188612.12_SUMO2      | SUMO2      | small ubiquitin like modifier 2                         | HGNC:11125 | 17q25    | 0.39757619 | 5.56517449 | 3.41972967 | 0.00274723 | 0.04665318 | -1.7332741 |
| ENSG00000180992.7_MRPL14      | MRPL14     | mitochondrial ribosomal protein L14                     | HGNC:14279 | 6p21.1   | 0.58287337 | 5.86785777 | 3.41795668 | 0.00275845 | 0.04673783 | -1.7372679 |
| ENSG00000236830.6_CBR3-AS1    | CBR3-AS1   | CBR3 antisense RNA 1                                    | HGNC:43664 | 21q22.12 | -0.9430005 | -0.8263849 | -3.4053911 | 0.00283926 | 0.04692616 | -1.7377883 |
| ENSG00000184988.8_TMEM106A    | TMEM106A   | transmembrane protein 106A                              | HGNC:28288 | 17q21.31 | -1.3791771 | -0.3264606 | -3.3529264 | 0.00320251 | 0.04982187 | -1.738128  |
| ENSG00000204301.6_NOTCH4      | NOTCH4     | notch receptor 4                                        | HGNC:7884  | 6p21.32  | -0.7593938 | 4.41367828 | -3.4055423 | 0.00283827 | 0.04692616 | -1.7463567 |
| ENSG00000108826.16_MRPL27     | MRPL27     | mitochondrial ribosomal protein L27                     | HGNC:14483 | 17q21.33 | 0.55704434 | 5.16594366 | 3.41216776 | 0.0027954  | 0.04685775 | -1.7468258 |
| ENSG00000214548.17_MEG3       | MEG3       | maternally expressed 3                                  | HGNC:14575 | 14q32.2  | -0.7891894 | 6.22528115 | -3.4124944 | 0.0027933  | 0.04685775 | -1.7479475 |
| ENSG00000111752.11_PHC1       | PHC1       | polyhomeotic homolog 1                                  | HGNC:3182  | 12p13.31 | -0.4645431 | 3.54092188 | -3.383473  | 0.00298581 | 0.04788379 | -1.7529243 |
| ENSG00000133116.8_KL          | KL         | klotho                                                  | HGNC:6344  | 13q13.1  | -1.195512  | -0.5893859 | -3.3605436 | 0.00314707 | 0.04944745 | -1.7586744 |
| ENSG00000241837.7_ATP5PO      | ATP5PO     | ATP synthase peripheral stalk subunit OSCP              | HGNC:850   | 21q22.11 | 0.53672837 | 7.87054089 | 3.40265058 | 0.00285719 | 0.04692616 | -1.759229  |
| ENSG00000142168.14_SOD1       | SOD1       | superoxide dismutase 1                                  | HGNC:11179 | 21q22.11 | 0.48748831 | 6.88523257 | 3.40505429 | 0.00284146 | 0.04692616 | -1.7625281 |
| ENSG00000173210.19_ABLIM3     | ABLIM3     | actin binding LIM protein family member 3               | HGNC:29132 | 5q32     | -0.4940546 | 4.72949093 | -3.3970195 | 0.00289438 | 0.04714227 | -1.772878  |
| ENSG00000173915.16_ATP5MD     | ATP5MD     | ATP synthase membrane subunit DAPIT                     | HGNC:30889 | 10q24.33 | 0.63130533 | 6.78889689 | 3.39863105 | 0.00288369 | 0.04714227 | -1.7767096 |
| ENSG00000131788.16_PIAS3      | PIAS3      | protein inhibitor of activated STAT 3                   | HGNC:16861 | 1q21.1   | -0.5004761 | 3.45002668 | -3.3662619 | 0.00310607 | 0.04901307 | -1.7777227 |
| ENSG00000112304.11_ACOT13     | ACOT13     | acyl-CoA thioesterase 13                                | HGNC:20999 | 6p22.3   | 0.61963282 | 4.30884873 | 3.38756198 | 0.00295792 | 0.04753916 | -1.7791356 |
| ENSG00000215021.8_PHB2        | PHB2       | prohibitin 2                                            | HGNC:30306 | 12p13.31 | 0.36600419 | 7.1098169  | 3.39328399 | 0.00291932 | 0.04738259 | -1.7866283 |
| ENSG00000142733.16_MAP3K6     | MAP3K6     | mitogen-activated protein kinase kinase kinase 6        | HGNC:6858  | 1p36.11  | -0.7492176 | 3.18540625 | -3.3545442 | 0.00319065 | 0.04982187 | -1.7924354 |
| ENSG00000106991.13_ENG        | ENG        | endoglin                                                | HGNC:3349  | 9q34.11  | -0.7926486 | 5.28460178 | -3.3911501 | 0.00293366 | 0.04739373 | -1.792494  |
| ENSG00000106733.21_NMRK1      | NMRK1      | nicotinamide riboside kinase 1                          | HGNC:26057 | 9q21.13  | 0.56628801 | 4.01090376 | 3.37462581 | 0.00304705 | 0.04840097 | -1.7938553 |
| ENSG000000087302.9_RTRAF      | RTRAF      | RNA transcription, translation and transport factor     | HGNC:23169 | 14q22.1  | 0.45824092 | 5.68496567 | 3.39048041 | 0.00293817 | 0.04739373 | -1.7965775 |
| ENSG00000170430.10_MGMT       | MGMT       | O-6-methylguanine-DNA methyltransferase                 | HGNC:7059  | 10q26.3  | 0.57236507 | 3.96448429 | 3.37016041 | 0.00307842 | 0.048693   | -1.7967164 |
| ENSG00000171953.16_ATPAF2     | ATPAF2     | ATP synthase mitochondrial F1 complex assembly factor 2 | HGNC:18802 | 17p11.2  | 0.447051   | 3.79535164 | 3.360248   | 0.0031492  | 0.04944745 | -1.8126108 |
| ENSG00000189043.10_NDUFA4     | NDUFA4     | NDUFA4 mitochondrial complex associated                 | HGNC:7687  | 7p21.3   | 0.56016447 | 8.66742322 | 3.3717615  | 0.00306714 | 0.04861706 | -1.812629  |
| ENSG00000217930.8_PAM16       | PAM16      | presequence translocase associated motor 16             | HGNC:29679 | 16p13.3  | 0.47203724 | 4.46364021 | 3.37123695 | 0.00307083 | 0.0486242  | -1.8193917 |
| ENSG00000100234.11_TIMP3      | TIMP3      | TIMP metallopeptidase inhibitor 3                       | HGNC:11822 | 22q12.3  | -0.7319181 | 6.75583895 | -3.3777606 | 0.00302521 | 0.04825859 | -1.8198284 |
| ENSG00000150459.12_SAP18      | SAP18      | Sin3A associated protein 18                             | HGNC:10530 | 13q12.11 | 0.39663877 | 6.88795258 | 3.37704796 | 0.00303016 | 0.04828619 | -1.8227924 |
| ENSG00000131143.8_COX4I1      | COX4I1     | cytochrome c oxidase subunit 4I1                        | HGNC:2265  | 16q24.1  | 0.52888892 | 8.56061261 | 3.36728834 | 0.00309877 | 0.04896318 | -1.8239079 |
| ENSG00000174886.13_NDUFA11    | NDUFA11    | NADH:ubiquinone oxidoreductase subunit A11              | HGNC:20371 | 19p13.3  | 0.46555229 | 6.36365559 | 3.375291   | 0.0030424  | 0.04839048 | -1.8286438 |
| ENSG00000132329.11_RAMP1      | RAMP1      | receptor activity modifying protein 1                   | HGNC:9843  | 2q37.3   | 0.51445155 | 5.83140433 | 3.37518226 | 0.00304316 | 0.04839048 | -1.8295829 |
| ENSG000000065268.10_WDR18     | WDR18      | WD repeat domain 18                                     | HGNC:17956 | 19p13.3  | 0.53257234 | 4.1586265  | 3.35724919 | 0.00317093 | 0.04968452 | -1.8353183 |
| ENSG00000178035.12_IMPDH2     | IMPDH2     | inosine monophosphate dehydrogenase 2                   | HGNC:6053  | 3p21.31  | 0.53191781 | 6.45737513 | 3.36290159 | 0.0031301  | 0.04925064 | -1.8549857 |
| ENSG00000198753.12_PLXNB3     | PLXNB3     | plexin B3                                               | HGNC:9105  | Xq28     | -1.4950417 | -1.1459072 | -3.3659263 | 0.00310846 | 0.04901307 | -1.8676439 |
| ENSG00000184544.11_DHRS7C     | DHRS7C     | dehydrogenase/reductase 7C                              | HGNC:32423 | 17p13.1  | 0.52111468 | 6.13677364 | 3.35635244 | 0.00317746 | 0.0497348  | -1.8698045 |
| ENSG00000170681.6_CAVIN4      | CAVIN4     | caveolae associated protein 4                           | HGNC:33742 | 9q31.1   | 0.56895935 | 7.35733357 | 3.35344575 | 0.0031987  | 0.04982187 | -1.8703473 |
| ENSG00000171291.8_ZNF439      | ZNF439     | zinc finger protein 439                                 | HGNC:20873 | 19p13.2  | -1.3557665 | -1.2267101 | -3.3793147 | 0.00301444 | 0.048138   | -1.8878963 |
| ENSG00000146151.13_HMGCLL1    | HMGCLL1    | 3-hydroxymethyl-3-methylglutaryl-CoA lyase like 1       | HGNC:21359 | 6p12.1   | -1.4192916 | -1.3245152 | -3.3503113 | 0.00322176 | 0.0499589  | -1.9061925 |
| ENSG00000138166.6_DUSP5       | DUSP5      | dual specificity phosphatase 5                          | HGNC:3071  | 10q25.2  | -1.7079611 | -1.2767473 | -3.357648  | 0.00316803 | 0.04968452 | -1.931726  |
| ENSG00000205266.10_KRT17P5    | KRT17P5    | keratin 17 pseudogene 5                                 | HGNC:50723 | 17p11.2  | 2.34892788 | -1.5760483 | 3.40909793 | 0.00281518 | 0.04685775 | -1.9488713 |
| ENSG00000196581.10_AJAP1      | AJAP1      | adherens junctions associated protein 1                 | HGNC:30801 | 1p36.32  | -2.0447234 | -1.4733323 | -3.3638185 | 0.00312353 | 0.04919882 | -1.9886567 |

**Supplementary Table 3. Top protein coding differentially expressed genes in CKD.**

| <b>Gene Symbol</b> | <b>Approved Gene Name</b>               | <b>log2(Fold Change)</b> | <b>Adjusted P-value</b> |
|--------------------|-----------------------------------------|--------------------------|-------------------------|
| ZBED6              | zinc finger BED-type containing 6       | 6.330096781              | 0.001324311             |
| TNFRSF10A          | TNF receptor superfamily member 10a     | -2.002062713             | 0.010853085             |
| FPR3               | formyl peptide receptor 3               | -2.152375106             | 0.018597767             |
| CNTN4              | contactin 4                             | -2.099431388             | 0.018116692             |
| ALX4               | ALX homeobox 4                          | -2.248772336             | 0.020512411             |
| EXOC3L2            | exocyst complex component 3 like 2      | -2.150247955             | 0.032903406             |
| FBXO16             | F-box protein 16                        | 2.086378177              | 0.031863499             |
| GFRA2              | GDNF family receptor alpha 2            | -2.120970567             | 0.04056584              |
| SIK1B              | salt inducible kinase 1B (putative)     | -2.0887466               | 0.047393725             |
| AJAP1              | adherens junctions associated protein 1 | -2.044723353             | 0.049198819             |

Supplementary Table 4. Pathway analysis.

| p-value   | q-value   | pathway                                                                                                             | source   | external_id   | members_input_overlap                                                                                 | members_input_overlap_geneids | size | effective_size |
|-----------|-----------|---------------------------------------------------------------------------------------------------------------------|----------|---------------|-------------------------------------------------------------------------------------------------------|-------------------------------|------|----------------|
| 2.23E-69  | 3.64E-67  | Eukaryotic Translation Elongation                                                                                   | Reactome | R-HSA-156842  | RPS13; RPS12; RPS11; RPS10; RPS17; RPS16; RPL27A; RPL9; RPL6; RP 4736; 6124; 6203; 6137; 6227; 6161   |                               | 106  | 105            |
| 8.93E-69  | 5.28E-67  | Formation of a pool of free 40S subunits                                                                            | Reactome | R-HSA-72689   | RPS13; RPS12; RPS11; RPS10; RPS17; RPS16; RPL27A; RPL9; RPL6; RP 4736; 6124; 6203; 6137; 6227; 6161   |                               | 115  | 113            |
| 9.82E-69  | 5.28E-67  | Eukaryotic Translation Termination                                                                                  | Reactome | R-HSA-72764   | TRMT112; RPS12; RPS11; RPS10; RPS17; RPS16; RPL27A; RPL9; RPL6; RP 4736; 6124; 6203; 6137; 6227; 6161 |                               | 104  | 103            |
| 1.30E-68  | 5.28E-67  | Peptide chain elongation                                                                                            | Reactome | R-HSA-156902  | RPS13; RPS12; RPS11; RPS10; RPS17; RPS16; RPL27A; RPL9; RPL6; RP 4736; 6124; 6203; 6137; 6227; 6161   |                               | 101  | 100            |
| 4.38E-67  | 1.43E-65  | Selenocysteine synthesis                                                                                            | Reactome | R-HSA-2408557 | RPS13; RPS12; RPS11; RPS10; RPS17; RPS16; RPL27A; RPL9; RPL6; RP 4736; 6124; 6203; 6137; 6227; 6161   |                               | 104  | 103            |
| 4.09E-66  | 1.11E-64  | Nonsense Mediated Decay (NMD) independent of the Exon Junction Complex (EJC)                                        | Reactome | R-HSA-975956  | RPS13; RPS12; RPS11; RPS10; RPS17; RPS16; RPL27A; RPL9; RPL6; RP 4736; 6124; 6203; 6137; 6227; 6161   |                               | 106  | 105            |
| 5.01E-66  | 1.17E-64  | L13a-mediated translational silencing of Ceruloplasmin expression                                                   | Reactome | R-HSA-156827  | RPS13; RPS12; RPS11; RPS10; RPS17; RPS16; RPL27A; RPL9; RPL6; RP 4736; 6124; 6203; 6137; 6227; 6161   |                               | 125  | 123            |
| 1.26E-65  | 2.56E-64  | GTP hydrolysis and joining of the 60S ribosomal subunit                                                             | Reactome | R-HSA-72706   | RPS13; RPS12; RPS11; RPS10; RPS17; RPS16; RPL27A; RPL9; RPL6; RP 4736; 6124; 6203; 6137; 6227; 6161   |                               | 126  | 124            |
| 2.98E-65  | 5.39E-64  | Translation                                                                                                         | Reactome | R-HSA-72766   | TRMT112; RPL21P16; RPL22; EIF3H; EIF3I; EIF3K; EIF3L; MRPL54; MRI 4736; 6124; 6137; 25873; 6227; 904  |                               | 310  | 307            |
| 1.56E-64  | 2.54E-63  | SRP-dependent cotranslational protein targeting to membrane                                                         | Reactome | R-HSA-1799339 | RPS13; RPS12; RPS11; RPS10; RPS17; RPS16; RPL27A; RPL9; RPL6; RP 4736; 6124; 6203; 6137; 6227; 6161   |                               | 124  | 123            |
| 6.36E-64  | 9.43E-63  | Ribosome - Homo sapiens (human)                                                                                     | KEGG     | path:hsa03010 | RPS13; RPS12; RPS11; RPL37A; RPS17; RPS16; RPL23A; MRPS21; RPL16144; 6146; 6147; 6152; 6154; 6156     |                               | 153  | 153            |
| 5.56E-63  | 6.97E-62  | Cap-dependent Translation Initiation                                                                                | Reactome | R-HSA-72737   | RPS13; RPS12; RPS11; RPS10; RPS17; RPS16; RPL27A; RPL9; RPL6; RP 4736; 6124; 6203; 6137; 6227; 6161   |                               | 133  | 131            |
| 5.56E-63  | 6.97E-62  | Eukaryotic Translation Initiation                                                                                   | Reactome | R-HSA-72613   | RPS13; RPS12; RPS11; RPS10; RPS17; RPS16; RPL27A; RPL9; RPL6; RP 4736; 6124; 6203; 6137; 6227; 6161   |                               | 133  | 131            |
| 5.92E-61  | 6.43E-60  | Nonsense Mediated Decay (NMD) enhanced by the Exon Junction Complex (EJC)                                           | Reactome | R-HSA-975957  | RPS13; RPS12; RPS11; RPS10; RPS17; RPS16; RPL27A; RPL9; RPL6; RP 4736; 6124; 6203; 6137; 6227; 6161   |                               | 118  | 117            |
| 5.92E-61  | 6.43E-60  | Nonsense-Mediated Decay (NMD)                                                                                       | Reactome | R-HSA-927802  | RPS13; RPS12; RPS11; RPS10; RPS17; RPS16; RPL27A; RPL9; RPL6; RP 4736; 6124; 6203; 6137; 6227; 6161   |                               | 118  | 117            |
| 1.97E-59  | 2.00E-58  | Selenoamino acid metabolism                                                                                         | Reactome | R-HSA-2408522 | RPS13; KARS; RPS11; RPL37A; RPS17; RPS16; RPL27A; RPS12; RPL6; RP 4736; 6124; 6203; 6137; 6227; 6161  |                               | 130  | 129            |
| 1.35E-32  | 1.30E-31  | Metabolism of RNA                                                                                                   | Reactome | R-HSA-8953854 | TRMT112; RPL26; PARN; RPL23; FAU; NUP214; RPL14; UTP14A; RPL1 6155; 10436; 10813; 6229; 63892; 6      |                               | 586  | 584            |
| 3.88E-28  | 3.52E-27  | Metabolism of amino acids and derivatives                                                                           | Reactome | R-HSA-71291   | RPS13; KARS; RPS11; RPL37A; RPS17; RPS16; RPL27A; RPL9; RPL6; RP 6155; 3735; 6191; 6229; 6133; 6144   |                               | 342  | 339            |
| 3.75E-25  | 3.22E-24  | Formation of the ternary complex, and subsequently, the 43S complex                                                 | Reactome | R-HSA-72695   | RPS13; RPS12; RPS11; RPS10; RPS17; RPS16; RPL27A; RPL9; RPL6; RP 6155; 3735; 6191; 6229; 6133; 6144   |                               | 61   | 59             |
| 3.75E-23  | 2.91E-22  | Translation initiation complex formation                                                                            | Reactome | R-HSA-72649   | RPS13; RPS12; RPS11; RPS10; RPS17; RPS16; RPL27A; RPL9; RPL6; RP 6155; 3735; 6191; 6229; 6133; 6144   |                               | 68   | 66             |
| 3.75E-23  | 2.91E-22  | Ribosomal scanning and start codon recognition                                                                      | Reactome | R-HSA-72702   | RPS13; RPS12; RPS11; RPS10; RPS17; RPS16; RPL27A; RPL9; RPL6; RP 6155; 3735; 6191; 6229; 6133; 6144   |                               | 68   | 66             |
| 6.81E-23  | 5.04E-22  | Activation of the mRNA upon binding of the cap-binding complex and eIFs, and subsequent binding to 43S              | Reactome | R-HSA-72662   | RPS13; RPS12; RPS11; RPS10; RPS17; RPS16; RPL27A; RPL9; RPL6; RP 6155; 3735; 6191; 6229; 6133; 6144   |                               | 69   | 67             |
| 2.17E-20  | 1.54E-19  | Metabolism of proteins                                                                                              | Reactome | R-HSA-392499  | TRAPPC2L; TRMT112; RPL26; TUSC3; SUMO2; CPE; TRAPPC2B; RPL23 6155; 54344; 6133; 6144; 6130; 620       |                               | 2008 | 1999           |
| 1.23E-14  | 7.68E-14  | Mitochondrial translation termination                                                                               | Reactome | R-HSA-5419276 | MRPL27; MRPL21; MRPL20; MRPL22; MRPS15; MRPS14; CHCHD1; M 90480; 55052; 7818; 122704; 54460           |                               | 89   | 88             |
| 1.23E-14  | 7.68E-14  | Mitochondrial translation elongation                                                                                | Reactome | R-HSA-5389840 | MRPL27; MRPL21; MRPL20; MRPL22; MRPS15; MRPS14; CHCHD1; M 90480; 55052; 7818; 122704; 54460           |                               | 89   | 88             |
| 1.23E-14  | 7.68E-14  | Mitochondrial translation initiation                                                                                | Reactome | R-HSA-5368286 | MRPL27; MRPL21; MRPL20; MRPL22; MRPS15; MRPS14; CHCHD1; M 90480; 55052; 7818; 122704; 54460           |                               | 89   | 88             |
| 7.99E-14  | 4.83E-13  | Mitochondrial translation                                                                                           | Reactome | R-HSA-5368287 | MRPL27; MRPL21; MRPL20; MRPL22; MRPS15; MRPS14; CHCHD1; M 90480; 55052; 7818; 122704; 54460           |                               | 95   | 94             |
| 1.59E-13  | 9.25E-13  | Oxidative phosphorylation - Homo sapiens (human)                                                                    | KEGG     | path:hsa00190 | ATP6V1F; COX5B; UQCRI1; NDUFB4; ATP6V1H; NDUFB1; U 514; 517; 521; 529; 539; 9296; 4707                |                               | 133  | 133            |
| 5.55E-13  | 3.12E-12  | Respiratory electron transport, ATP synthesis by chemiosmotic coupling, and heat production by uncoupling proteins. | Reactome | R-HSA-163200  | COX5B; UQCRI1; NDUFB4; NDUFB1; UQCRI1; UQCRI1; COX1 4725; 10632; 10975; 29796; 1327; 5                |                               | 123  | 123            |
| 8.64E-12  | 4.69E-11  | Metabolism                                                                                                          | Reactome | R-HSA-1430728 | TRMT112; HADHA; MAN2B2; RPL12; MAN2B1; NDUFB7; SUMO2; ND 6155; 160428; 6133; 6144; 3707; 61           |                               | 1972 | 1960           |
| 2.39E-10  | 1.26E-09  | Alzheimer disease - Homo sapiens (human)                                                                            | KEGG     | path:hsa05010 | COX5B; UQCRI1; NDUFB4; NDUFB1; UQCRI1; UQCRI1; COX1 514; 517; 539; 4695; 4696; 4697; 47               |                               | 171  | 171            |
| 2.80E-10  | 1.43E-09  | Thermogenesis - Homo sapiens (human)                                                                                | KEGG     | path:hsa04714 | COX5B; NDUFB7; UQCRI1; NDUFB4; MGLL; NDUFB1; UQCRI1; RPS6; I514; 51287; 517; 4701; 6194; 11343        |                               | 229  | 229            |
| 7.01E-10  | 3.46E-09  | Respiratory electron transport                                                                                      | Reactome | R-HSA-611105  | COX5B; UQCRI1; NDUFB4; NDUFB1; UQCRI1; UQCRI1; COX1 4725; 10975; 29796; 1327; 4696; 51                |                               | 100  | 100            |
| 3.35E-09  | 1.60E-08  | Parkinson disease - Homo sapiens (human)                                                                            | KEGG     | path:hsa05012 | COX5B; NDUFB7; UQCRI1; NDUFB4; NDUFB1; UQCRI1; UQCRI1; COX1 514; 517; 539; 11315; 4695; 4696; 47      |                               | 142  | 142            |
| 5.52E-09  | 2.57E-08  | The citric acid (TCA) cycle and respiratory electron transport                                                      | Reactome | R-HSA-1428517 | COX5B; UQCRI1; NDUFB4; NDUFB1; UQCRI1; UQCRI1; COX1 4725; 10632; 4707; 29796; 1327; 53                |                               | 173  | 173            |
| 7.79E-08  | 3.53E-07  | Huntington disease - Homo sapiens (human)                                                                           | KEGG     | path:hsa05016 | COX5B; NDUFB7; UQCRI1; NDUFB4; NDUFB1; UQCRI1; UQCRI1; COX1 514; 4696; 1340; 539; 517; 4695; 46       |                               | 193  | 193            |
| 4.05E-06  | 1.78E-05  | Proteasome - Homo sapiens (human)                                                                                   | KEGG     | path:hsa03050 | POMP; PSMD4; PSMA2; SEM1; PSMA4; PSMB7; PSMB8; PSM 51371; 7979; 5683; 5685; 5689; 569                 |                               | 45   | 45             |
| 7.33E-06  | 3.14E-05  | Non-alcoholic fatty liver disease (NAFLD) - Homo sapiens (human)                                                    | KEGG     | path:hsa04932 | COX5B; NDUFB7; UQCRI1; NDUFB4; NDUFB1; UQCRI1; UQCRI1; COX1 4695; 4696; 4697; 4701; 4707; 4710        |                               | 149  | 149            |
| 6.77E-05  | 0.0002828 | TP53 Regulates Metabolic Genes                                                                                      | Reactome | R-HSA-5628897 | TP63; NDUFA4; MOV10; COX5B; TXN; PRDX1; COX411; COX6C; COX61 8626; 1350; 7295; 28956; 1327; 132       |                               | 86   | 86             |
| 0.0001787 | 0.0007283 | Complex I biogenesis                                                                                                | Reactome | R-HSA-6799198 | NDUFA7; NDUFA2; NDUFA3; NDUFB7; NDUFB4; NDUFB1; NDUFS4; N 4707; 4725; 4696; 4695; 4724; 4710          |                               | 55   | 55             |
| 0.0002491 | 0.0009904 | Formation of TC-NER Pre-Incision Complex                                                                            | Reactome | R-HSA-6781823 | RPS27A; COP56; GTF2H5; UBA52; POLR2F; RBX1; POLR2L; MNAT1; P 5435; 5439; 4331; 5441; 10450; 543       |                               | 57   | 57             |
| 0.0002592 | 0.0010059 | Rho GTPase cycle                                                                                                    | Reactome | R-HSA-194840  | ARHGEF10; PLEKHG2; TRIO; ARHGAP31; ARAP3; ARHGEF15; PLEKHG 23380; 85360; 392; 23263; 57449; 2         |                               | 144  | 140            |
| 0.0002916 | 0.0011054 | Signaling by NOTCH                                                                                                  | Reactome | R-HSA-157118  | NEURLB1; HEYL; MOV10; PLXND1; SKP1; RPS27A; NOTCH1; HIF1A; N 4854; 4242; 182; 4343; 2683; 11060       |                               | 120  | 119            |
| 0.0003175 | 0.0011763 | Gap-filling DNA repair synthesis and ligation in TC-NER                                                             | Reactome | R-HSA-6782210 | RPS27A; GTF2H5; RFC2; UBA52; POLE4; POLR2F; RBX1; POLR2L; MN 56655; 5435; 5439; 4331; 5441; 104       |                               | 68   | 68             |
| 0.0003254 | 0.0011786 | Cardiac muscle contraction - Homo sapiens (human)                                                                   | KEGG     | path:hsa04260 | SLC9A1; COX5B; UQCRI1; UQCRI1; ATP1B2; UQCRI1; COX411; UQCRI 1350; 1327; 1329; 1340; 1346; 1345       |                               | 78   | 78             |
| 0.0003654 | 0.0012947 | Dual incision in TC-NER                                                                                             | Reactome | R-HSA-6782135 | RPS27A; GTF2H5; RFC2; UBA52; POLE4; POLR2F; RBX1; POLR2L; MN 56655; 5435; 5439; 4331; 5441; 104       |                               | 69   | 69             |
| 0.0003829 | 0.001328  | Signaling by VEGF                                                                                                   | Reactome | R-HSA-194138  | NOS3; CYFIP1; CALM1; DOCK1; NRPI; BRK1; KDR; CTNND1; ITPR3; FL 3791; 4846; 8828; 23191; 1500; 984     |                               | 100  | 100            |
| 0.0004754 | 0.0016144 | Transcription-Coupled Nucleotide Excision Repair (TC-NER)                                                           | Reactome | R-HSA-6781827 | RPS27A; COP56; GTF2H5; RFC2; UBA52; POLR2F; RBX1; POLR 56655; 5435; 5439; 4331; 5441; 104             |                               | 81   | 81             |
| 0.0004871 | 0.0016204 | mRNA Splicing - Minor Pathway                                                                                       | Reactome | R-HSA-72165   | SNRPD2; SNRPD1; SF3B5; POLR2F; ZMAT5; SNU13; POLR2L; POLR2J; I 5441; 5435; 55954; 6635; 83443; 54     |                               | 52   | 52             |
| 0.000739  | 0.0024091 | Axon guidance                                                                                                       | Reactome | R-HSA-422475  | EFNB2; SCN7A; EFNB1; COL4A1; ITGA1; RPS27A; GAB2; RET; SRGAP2; 1605; 1282; 3672; 116986; 219699; :    |                               | 358  | 357            |
| 0.000902  | 0.0028829 | Cell death signalling via NRAGE, NRIF and NADE                                                                      | Reactome | R-HSA-204998  | PLEKHG2; ARHGEF10; TRIO; RPS27A; FGD1; ARHGEF15; PREX1; PLEK1 7204; 57580; 7531; 2245; 64857; 73      |                               | 78   | 76             |
| 0.0011864 | 0.0037189 | HIV Infection                                                                                                       | Reactome | R-HSA-162906  | RPS27A; ATP6V1H; TAF12; CHMP2A; ELOB; XRCCE6; SKP1; NPM1; VPS 4331; 8815; 2547; 9525; 4869; 2332      |                               | 197  | 195            |
| 0.00125   | 0.0038445 | Neddylation                                                                                                         | Reactome | R-HSA-8951664 | PSMD4; RPS27A; COP56; HIF1A; ELOB; NEDD8; COMMD9; SKP1; COV 5691; 5702; 29099; 5694; 6233; 569        |                               | 235  | 234            |
| 0.0013825 | 0.0041732 | Retrograde endocannabinoid signaling - Homo sapiens (human)                                                         | KEGG     | path:hsa04723 | DAGLA; NDUFA7; NDUFA4; ADCY7; NDUFA2; NDUFA3; NDUFB7; ADC 4695; 54539; 11343; 4696; 4697; 47          |                               | 148  | 148            |
| 0.001448  | 0.0042915 | UCH proteinases                                                                                                     | Reactome | R-HSA-5689603 | NEDD8; PSMD4; RPS27A; PSMA2; UBA52; SEM1; PSMA4; PSMC1; PS 5691; 5702; 5694; 5693; 5689; 5700         |                               | 102  | 102            |
| 0.0016136 | 0.0046968 | Death Receptor Signalling                                                                                           | Reactome | R-HSA-73887   | ARHGEF10; PLEKHG2; TRIO; TNFSF10; FGD1; ARHGEF15; YWHAE; PRI 7204; 23263; 8743; 22899; 9639; 90       |                               | 141  | 138            |
| 0.0018577 | 0.0053125 | Extracellular matrix organization                                                                                   | Reactome | R-HSA-1474244 | COLGALT1; COL11A2; ITGA1; HSPG2; VCAN; ITGA6; MFAP1; LAMB1; :3791; 1306; 1605; 7837; 4811; 3911       |                               | 294  | 294            |
| 0.0021488 | 0.0060389 | Signaling by NOTCH1                                                                                                 | Reactome | R-HSA-1980143 | NEURLB1; HEYL; SKP1; RPS27A; NOTCH1; HIF1A; UBA52; DLL4; RBX1; 54492; 182; 26508; 4851; 7311; 545     |                               | 74   | 73             |
| 0.0022398 | 0.006188  | Signaling by Receptor Tyrosine Kinases                                                                              | Reactome | R-HSA-9006934 | PDGFRB; ATP6V1F; CYFIP1; RPS27A; PCSK6; ATP6V1H; SPRED2; BRK1 200734; 5439; 9365; 8829; 2324; 50      |                               | 423  | 423            |
| 0.0030076 | 0.0081708 | Spliceosome - Homo sapiens (human)                                                                                  | KEGG     | path:hsa03040 | LSM7; SNRPD2; SNRPD1; SF3B5; PRPF18; CTNNBL1; LSM3; SNRPC; ZN 27258; 4809; 10450; 10465; 51503; :     |                               | 134  | 134            |
| 0.0032632 | 0.0087197 | Infectious disease                                                                                                  | Reactome | R-HSA-5663205 | ANTXR1; RPS27A; ATP6V1H; TAF12; CHMP2A; ELOB; CTNND1; XRCCE 4331; 8815; 2547; 5435; 5439; 801; :      |                               | 253  | 251            |
| 0.0038179 | 0.0100375 | Nucleotide Excision Repair                                                                                          | Reactome | R-HSA-5696398 | RPS27A; POLE4; SUMO2; COP56; GTF2H5; RFC2; UBA52; POLR2F; PO 10450; 5982; 5439; 4331; 404672; 6       |                               | 113  | 113            |
| 0.0047118 | 0.0121909 | Collagen formation                                                                                                  | Reactome | R-HSA-1474290 | COL15A1; LOXL2; COLGALT1; COL11A2; PLOD2; PLOD1; ITGA6; COL5 1306; 4017; 7837; 1302; 79709; 535       |                               | 92   | 92             |
| 0.0049208 | 0.0125328 | Transcriptional Regulation by TP53                                                                                  | Reactome | R-HSA-3700989 | MOV10; COX5B; RPS27A; PRDX1; RFC2; CASP10; TAF12; TNFRSF10A; 1107; 5439; 8797; 1350; 7531; 8626       |                               | 374  | 371            |
| 0.0051202 | 0.0128398 | HIV Life Cycle                                                                                                      | Reactome | R-HSA-162587  | NEDD4L; VPS28; RPS27A; TAF12; GTF2H5; BANF1; UBA52; CHMP2A; 4331; 8815; 2547; 9525; 51160; 543        |                               | 156  | 154            |
| 0.0053933 | 0.0133199 | ECM-receptor interaction - Homo sapiens (human)                                                                     | KEGG     | path:hsa04512 | LAMA5; FN1; ITGA1; THBS4; HSPG2; ITGA6; DAG1; COL4A1; LAMB1; :1282; 1284; 1293; 1605; 2335            |                               | 82   | 82             |
| 0.0058162 | 0.01415   | Muscle contraction                                                                                                  | Reactome | R-HSA-397014  | FXYD6; TMOD4; TNNT3; RYR3; CLIC2; TMOD3; SCN7A; ITGA1; KCNK6 29766; 1193; 859; 29765; 6332; 538       |                               | 195  | 195            |
| 0.0066383 | 0.0156817 | PTEN Regulation                                                                                                     | Reactome | R-HSA-6807070 | CHD3; RPS27A; PREX2; MECOM; WWP2; LAMTOR4; UBA52; PHC1; SF 1107; 6591; 1911; 28956; 84733; 80         |                               | 96   | 96             |
| 0.0066383 | 0.0156817 | p75 NTR receptor-mediated signalling                                                                                | Reactome | R-HSA-193704  | ARHGEF10; PLEKHG2; TRIO; RPS27A; FGD1; ARHGEF15; PREX1; PLEK1 23263; 22899; 9639; 64857; 26084; :     |                               | 99   | 96             |
| 0.0073788 | 0.0171822 | mRNA Splicing                                                                                                       | Reactome | R-HSA-72172   | PIIH; DNAJC8; SNRPD2; SNRPD1; SF3B5; POLR2L; LSM7; LSM3; SNRP 10450; 83443; 56259; 51503; 6632; :     |                               | 186  | 186            |
| 0.0084107 | 0.0193091 | G alpha (12/13) signalling events                                                                                   | Reactome | R-HSA-416482  | ARHGEF10; PLEKHG2; TRIO; FGD1; ARHGEF15; PREX1; GNB4; PLEKH 23263; 22899; 9639; 64857; 26084; :       |                               | 89   | 87             |
| 0.0088784 | 0.0200998 | Apelin signaling pathway - Homo sapiens (human)                                                                     | KEGG     | path:hsa04371 | ADCY4; NOTCH3; ADCY7; APPLNR; SLC9A1; GABARAPL2; GNB4; RYR3; 6194; 11337; 11345; 113; 6263; 371       |                               | 137  | 137            |
| 0.0099009 | 0.0221075 | mRNA Splicing - Major Pathway                                                                                       | Reactome | R-HSA-72163   | PIIH; DNAJC8; SNRPD2; SNRPD1; SF3B5; POLR2L; LSM7; LSM3; SNRP 10450; 83443; 56259; 51503; 6632; :     |                               | 178  | 178            |

**Supplementary Table 5. Gene set enrichment analysis (GSEA) between CKD and control.**

| Gene Sets                                  | Number of Genes | Direction | P-Value     | Adjusted P-value |
|--------------------------------------------|-----------------|-----------|-------------|------------------|
| HALLMARK_OXIDATIVE_PHOSPHORYLATION         | 200             | Up        | 7.50E-16    | 3.75E-14         |
| HALLMARK_MYC_TARGETS_V1                    | 193             | Up        | 4.43E-12    | 1.11E-10         |
| HALLMARK_DNA_REPAIR                        | 146             | Up        | 0.000489754 | 0.002320234      |
| HALLMARK_MYC_TARGETS_V2                    | 57              | Up        | 0.00177854  | 0.006204822      |
| HALLMARK_E2F_TARGETS                       | 167             | Up        | 0.004517185 | 0.01188733       |
| HALLMARK_REACTIVE_OXIGEN_SPECIES_PATHWAY   | 48              | Up        | 0.019567373 | 0.039134745      |
| HALLMARK_FATTY_ACID_METABOLISM             | 141             | Up        | 0.022430812 | 0.043136177      |
| HALLMARK_EPITHELIAL_MESENCHYMAL_TRANSITION | 174             | Down      | 2.61E-06    | 4.35E-05         |
| HALLMARK_ANGIOGENESIS                      | 28              | Down      | 4.76E-06    | 5.95E-05         |
| HALLMARK_APICAL_JUNCTION                   | 169             | Down      | 4.20E-05    | 0.000420087      |
| HALLMARK_WNT_BETA_CATENIN_SIGNALING        | 37              | Down      | 7.96E-05    | 0.00066292       |
| HALLMARK_INTERFERON_ALPHA_RESPONSE         | 89              | Down      | 0.000243326 | 0.00156728       |
| HALLMARK_TGF_BETA_SIGNALING                | 51              | Down      | 0.000250765 | 0.00156728       |
| HALLMARK_INTERFERON_GAMMA_RESPONSE         | 179             | Down      | 0.000409665 | 0.002275915      |
| HALLMARK_UV_RESPONSE_DN                    | 137             | Down      | 0.000510451 | 0.002320234      |
| HALLMARK_HEDGEHOG_SIGNALING                | 29              | Down      | 0.00058082  | 0.002420085      |
| HALLMARK_IL2_STAT5_SIGNALING               | 163             | Down      | 0.001351235 | 0.005197059      |
| HALLMARK_COAGULATION                       | 100             | Down      | 0.001861447 | 0.006204822      |
| HALLMARK_IL6_JAK_STAT3_SIGNALING           | 64              | Down      | 0.003136824 | 0.009265315      |
| HALLMARK_NOTCH_SIGNALING                   | 31              | Down      | 0.003150207 | 0.009265315      |
| HALLMARK_COMPLEMENT                        | 162             | Down      | 0.003647576 | 0.010132154      |
| HALLMARK_KRAS_SIGNALING_UP                 | 156             | Down      | 0.005043272 | 0.01260818       |
| HALLMARK_APICAL_SURFACE                    | 32              | Down      | 0.006503832 | 0.015485315      |
| HALLMARK_ESTROGEN_RESPONSE_EARLY           | 163             | Down      | 0.010805356 | 0.024557627      |
| HALLMARK_MITOTIC_SPINDLE                   | 176             | Down      | 0.013739249 | 0.028885432      |
| HALLMARK_INFLAMMATORY_RESPONSE             | 142             | Down      | 0.013865007 | 0.028885432      |

Supplementary Table 6. Gene set enrichment analysis (GSEA) between Dialysis and CKD.

| Gene Sets                          | Number of Genes | Direction | P-Value     | Adjusted P-value |
|------------------------------------|-----------------|-----------|-------------|------------------|
| HALLMARK_INTERFERON_ALPHA_RESPONSE | 89              | Up        | 1.19E-07    | 5.97E-06         |
| HALLMARK_INTERFERON_GAMMA_RESPONSE | 179             | Up        | 3.16E-05    | 0.00039557       |
| HALLMARK_UV_RESPONSE_DN            | 137             | Down      | 1.70E-06    | 4.25E-05         |
| HALLMARK_ANDROGEN_RESPONSE         | 90              | Down      | 1.30E-05    | 0.000216151      |
| HALLMARK_PROTEIN_SECRETION         | 93              | Down      | 0.000452543 | 0.00452543       |
| HALLMARK_MTORC1_SIGNALING          | 194             | Down      | 0.00343862  | 0.028655168      |
| HALLMARK_ANGIOGENESIS              | 28              | Down      | 0.006345449 | 0.042921575      |
| HALLMARK_ADIPOGENESIS              | 195             | Down      | 0.006867452 | 0.042921575      |
| HALLMARK_BILE_ACID_METABOLISM      | 83              | Down      | 0.009425769 | 0.049756731      |
| HALLMARK_MYC_TARGETS_V1            | 193             | Down      | 0.009951346 | 0.049756731      |

**Supplementary Table 7. Laboratory Data**

|                             | Control    | CKD           | Dialysis*        |
|-----------------------------|------------|---------------|------------------|
| Number                      | 16         | 29            | 9                |
| Hemoglobin (g/dL)           | 13.5 ± 1.5 | 11.3 ± 2.2    | 10.0 ± 1.2       |
| Bicarbonate (mEq/L)         | 24.6 ± 2.3 | 22.0 ± 3.7    | 23.3 ± 2.8       |
| Calcium (mg/dL)             | ....       | 9.5 ± 0.6     | 8.9 ± 0.5        |
| Phosphate (mg/dL)           | ....       | 4.0 ± 0.9     | 5.6 ± 1.1        |
| Parathyroid hormone (pg/mL) | ....       | 150 (93, 264) | 432.3 (246, 507) |
| Potassium (mEq/L)           | ....       | 4.7 ± 0.5     | 4.4 ± 0.6        |

Abbreviations: CKD, chronic kidney disease.

Data presented as mean ± standard deviation or median (interquartile range).

\*Dialysis category includes 5 participants whose first muscle biopsy occurred after they had started dialysis and 4 participants from the CKD group who underwent a second muscle biopsy after starting dialysis. Calcium, phosphate, and parathyroid hormone values were not available for one participant in the Dialysis group.

**Supplementary Table 8. Dietary variables before and after initiation of dialysis**

| Change in dietary variables after initiation of dialysis (n=4) |                  |                  |         |
|----------------------------------------------------------------|------------------|------------------|---------|
|                                                                | Pre-dialysis     | Post-dialysis    | P value |
| Protein (g/day)                                                | 82 (52-117)      | 65 (53-89)       | 0.27    |
| % kcal from protein                                            | 14.0 (12.3-16.2) | 16.7 (15.0-19.9) | 0.07    |
| Energy (kcal)                                                  | 2318 (1689-2884) | 1406 (1327-1955) | 0.07    |

Data reported as median (interquartile range). P values calculated using the Wilcoxon matched-pairs signed-rank test.

## **Supplementary Appendix. Full Methods**

### **Study Population**

The population of this study is drawn from two studies which have been previously described (14, 109). All patients with CKD were recruited from the nephrology clinics and faculty practice at Montefiore Medical Center. Participants with CKD stages 4 and 5 and ESRD and healthy sedentary controls were recruited between March 2015 and January 2020 from a prospective cohort study of patients with an  $\text{eGFR} < 30 \text{ mL} \cdot \text{min}^{-1} \cdot 1.73 \text{ m}^{-2}$  (14). Eligible patients were  $\geq 21$  years of age and able to provide written informed consent for study participation. Exclusion criteria included lower extremity amputation, use of immunosuppressive medication in the previous 3 months, and current cancer diagnosis and/or treatment, and additionally, for muscle biopsy, the use of anticoagulant medications or antiplatelet agents that could not be stopped for at least one week. Healthy, sedentary individuals without evidence of kidney disease ( $\text{eGFR} > 60 \text{ mL/min/1.73m}^2$  and urine albumin:creatinine ratio  $< 30 \text{ mg/g}$ ) were recruited as control participants. Sedentary was defined as not participating in physically strenuous work, brisk physical leisure activity, or formal exercise more than once per week in the previous 3 months. Study visits occurred in the Clinical Research Center every 3 months. Dietary protein and energy intake were assessed using the Dialysis FFQ (110), which is a modified version of the Block FFQ (111), a validated instrument that produces estimates of an individual's food intake based on food groups, portion size and frequency. The Dialysis FFQ was administered by a member of the study team. Participants were asked to estimate their food intake for the last 3 months and for seasonal foods to estimate intake at the time of availability. FFQs were analyzed by NutriQuest (Berkeley, CA) using the Minnesota Nutrition Data System for Research (112). In addition, urine urea nitrogen (UUN) measured in timed 24-hour urine collections was used to calculate DPI among CKD patients and controls as follows:  $\text{DPI} = 6.25 \times (\text{UUN (g/d)} + \text{weight (kg)} \times 0.031)$  (113). Unilateral knee extensor strength was measured using isometric dynamometry with a handheld dynamometer (Manual Muscle Test System, Lafayette Instrument, Lafayette, IN). To ensure assessment of maximum strength, subjects were instructed to perform a maximal exertion contraction, and two trials were recorded. The highest result achieved in each leg was used for analysis. Endurance capacity was measured by the 2-minute walk test (114): Participants were asked to walk back and forth over a 50-foot course as far as possible over 2 minutes. The distance covered is highly correlated with 6-minute walk distance (115). The SPPB is an established measure of mobility in older adults (116). It includes a 4-meter walk test,

a standing balance test, and a 5-repetition sit-to-stand test, and is scored 0-12, with higher scores indicating better function. Handgrip strength was measured twice in each hand using a handheld dynamometer (North Coast Medical, Morgan Hill, CA). The maximum value attained using the dominant hand was used for analysis. Physical activity level was measured using triaxial accelerometers (Actigraph GT3X-BT, Actigraph, Pensacola, FL) worn around the waist for 7 consecutive days. Data processing was performed using 60-second epochs in ActiLife 6.13.3 and wear-time validation was performed as previously described (117). Intensity levels were defined based on counts-per-minute (cpm): sedentary, <100 cpm; light, 100-1951 cpm; moderate, 1952-5724 cpm; vigorous, 5725-9498 cpm; and very vigorous,  $\geq 9499$  cpm (118, 119). Sedentary time was classified according to daily time spent in sedentary bouts of 10 or more consecutive minutes, excluding sleep time (117). We previously reported ECM collagen content by picro-sirius red staining in a subset of these participants (10 CKD patients and 10 control participants). Additional participants with CKD stages 3 and 4 were enrolled in a multicenter, double-blind, randomized, placebo-controlled trial of sodium bicarbonate therapy (ClinicalTrials.gov identifier NCT01452412) and underwent muscle biopsy between September 2011 and May 2015 (109). Only participants enrolled at the Albert Einstein College of Medicine were eligible for the biopsy component of the study. Data reported here, including muscle biopsy results, were collected at baseline prior to initiating study treatment. Exclusion criteria included treatment with alkali therapy in the previous 3 months, serum bicarbonate levels < 20 or >26 mEq/L, New York Heart Association class III or IV heart failure, systolic blood pressure > 180 mm Hg, initiation of kidney replacement therapy planned within 6 months, and use of immunosuppressive medication in the previous 3 months. Medical history was collected by standardized questionnaire and medical record review. Lower extremity performance was assessed using a 10-repetition sit-to-stand test; the split time required to complete 5 repetitions was also recorded. Handgrip strength was measured as described above. Serum creatinine, serum bicarbonate, and hemoglobin were measured at study visits, and other laboratory parameters were measured as part of routine clinical care. All laboratory tests were conducted in the clinical laboratory of Montefiore Medical Center. eGFR was calculated by the Chronic Kidney Disease Epidemiology Collaboration (CKD-EPI) equation (120). Study data were collected and managed using REDCap (Research Electronic Data Capture) electronic data capture tools hosted at the Albert Einstein College of Medicine (121). Race/ethnicity was self-identified using categories consistent with NIH guidelines.

## **Muscle Biopsies and Tissue Processing**

Biopsy procedures have been previously described (14). Subjects were admitted to the Clinical Research Center at 8:00am following an overnight fast. Through an incision site 15 cm proximal to the superior border of the patella, approximately 100-150 mg of muscle tissue was collected from vastus lateralis using a 12-gauge biopsy needle (Bard Monopty, Bard Biopsy Systems, Tempe, AZ). A portion of the muscle biopsy was immediately flash frozen in liquid nitrogen for RNA and biochemical analysis. A portion of the muscle sample selected based on optimal orientation of myofibers was gently separated for immunohistochemical preparation. The remaining portion of muscle tissue was quickly blotted to remove excess blood and immediately flash frozen in liquid nitrogen and stored at -80°C. For immunohistochemical analysis, muscle was covered in Tissue Tek (O.C.T. Compound, Sakura Finetek, Torrance, CA, USA) at resting length and frozen in liquid nitrogen-cooled 2-methylbutane, then stored at -80°C until analysis. Sample size for outcomes listed below was dependent on sufficient tissue quantity; certain participant biopsy samples provided insufficient muscle tissue for all downstream assays.

## **Immunohistochemistry**

Seven  $\mu\text{m}$ -thick sections were cut with a cryostat at -25°C (HM525-NX, Thermo Fisher Scientific, Waltham, MA, USA) and air dried on slides for 1 h. Slides were then stored at -20°C until immunohistochemical/histochemical staining was performed. Immunohistochemical techniques were performed as previously described by our group (122).

Picro-sirius red staining to denote ECM collagen content was performed as previously described (28). Sections were fixed in Bouin's solution (#15990-10, Electron Microscopy Sciences) in a water bath at 56°C for 1 h. Following a brief wash, sections were incubated in Sirius Red solution (ab150681, Abcam; 0.1% in saturated picric acid) for 2 h at room temperature. Slides were then washed in 0.5% acetic acid, dehydrated in 95% and 100% ethanol, equilibrated in xylenes, and mounted in xylene-based mounting media.

For immunofluorescent detection of satellite cells and capillaries, sections were fixed in acetone at -20°C for 3 min, washed in phosphate-buffered saline (PBS; pH 7.5), and placed in 3% hydrogen peroxide for 7 min to block endogenous peroxidases. Slides were then washed in PBS and blocked for 1 h at room temperature in 2.5% normal horse serum (NHS; #S-2012,

Vector Laboratories), followed by overnight incubation at 4°C in the following primary antibodies diluted in 2.5% NHS: anti-myosin heavy chain type I mouse IgG2b at 1:75 (BA.D5-C, Developmental Studies Hybridoma Bank (DHSB), University of Iowa), anti-laminin rabbit IgG at 1:200 (#L9393, Sigma), anti-Pax7 mouse IgG at 1:100 (concentrate from DHSB), and rhodamine labeled Ulex Europaeus Agglutinin I at 1:50 to detect capillaries (#RL-1062, Vector Laboratories) (34, 123). The Pax7 antibody was deposited to the DSHB by Kawakami, A. (DSHB Hybridoma Product PAX7), and the BA-D5 antibody was deposited to the DSHB by Schiaffino, S. (DSHB Hybridoma Product BA-D5). The next morning, slides were washed in PBS and incubated for 1 h at room temperature in the following secondary antibodies diluted in 2.5% NHS: goat anti-mouse IgG2b AF647 at 1:500 to detect myosin heavy chain type I (#A21242, Invitrogen), goat anti-rabbit IgG AF647 at 1:500 to detect laminin (#A21245, Invitrogen), and biotinylated goat anti-mouse IgG at 1:1000 (#115-065-205, Jackson Immuno Research). Slides were washed and incubated for 1 h at room temperature in streptavidin-horse radish peroxidase included in a commercially available TSA kit (SA-HRP, Life Technologies/Thermo Fisher Scientific, Waltham, MA USA). Following a PBS wash, slides were incubated in TSA-Alexa Fluor 488 to amplify Pax7. Lastly, sections were incubated for 10 min in 4',6-diamidino-2-phenylindole (DAPI; 10 nM, Life Technologies/Thermo Fisher Scientific), washed in PBS, and mounted with Vectashield fluorescence mounting media (Vector Laboratories, Burlingame, CA, USA).

For identification of ki67+ satellite cells, sections were fixed for 7 min at room temperature in 4% paraformaldehyde (PFA) followed by epitope retrieval in sodium citrate (10mM, pH 6.5) at 92°C. Endogenous peroxidases were blocked by placing slides in 3% hydrogen peroxide for 7 min, followed by a 1 h block at room temperature in 1% blocking reagent included in a commercially available tyramide signal amplification kit (TSA, Life Technologies/Thermo Fisher Scientific). Slides were then incubated overnight at 4°C in rabbit primary antibody against ki67 (#CRM325B, Biocare Medical) at 1:100 in 1% TSA blocking reagent and mouse primary antibody against Pax7 (concentrate from DHSB) at 1:100 in 1% TSA blocking reagent. The following day, slides were washed in PBS and incubated for 80 min at room temperature in goat anti-rabbit IgG secondary antibody conjugated to AF555 (#A21249, Invitrogen) at 1:250 in PBS and biotinylated goat anti-mouse IgG secondary antibody ((#115-065-205, Jackson Immuno Research) at 1:250 in PBS. Slides were washed and incubated for 1 h at room temperature in SA-HRP, followed by amplification of Pax7 using TSA-Alexa Fluor 488 (Life Technologies/Thermo Fisher Scientific). Slides were then washed in PBS, incubated in DAPI

(10 nM, LifeTechnologies/Thermo Fisher Scientific) and mounted with Vectashield fluorescence mounting media (Vector Laboratories).

### **Image Acquisition and Analysis**

Images were captured at x100-400 magnification at room temperature using a Zeiss upright microscope (AxioImager M1; Zeiss, Oberkochen, Germany). Image analysis was performed in a blinded manner using Image J Fiji or Zen software (v3.1, Zeiss). Picro-sirius red staining was quantified to measure collagen content of the ECM using Image J Fiji software as previously described (122). The area of picro-sirius red+ collagen was normalized to the total muscle area (mm<sup>2</sup>). Picro-sirius red was also imaged under polarized light to quantify densely packed (red) and loosely packed (green) collagen relative to total muscle area (124, 125).

Satellite cell abundance was determined by co-staining of Pax7 and DAPI within the laminin border. Pax7+/DAPI+ cells within the laminin border were counted as satellite cells and normalized to total number of myofibers. Proliferation of satellite cells was assessed by costaining of ki67 and Pax7. Ki67+/Pax7+/DAPI+ cells inside the laminin border were counted as proliferating satellite cells and normalized to total satellite cell number. Capillaries were measured as *Ulex Europaeus* agglutinin-positive cellular structures outside the myofiber laminin border, as previously described (126). CFPE was used to assess capillary density relative to myofiber perimeter and was quantified as the ratio between the number of capillaries of each myofiber with a correction for capillary sharing and myofiber perimeter, as previously described (35). CFPE was calculated using at least 50 myofibers for each sample per published recommendations (127). Myovision software generated automated analysis of myofiber CSA, myonuclear density (total number of myonuclei normalized to total number of myofibers), and myonuclear domain (area of each individual myofiber normalized to number of myonuclei within that same myofiber) using laminin and DAPI (128).

### **Hydroxyproline Biochemical Assay**

To assess total muscle collagen content, hydroxyproline was assayed from approximately 10 mg of muscle tissue similar to our prior methods (129) using a modified protocol with a commercially available Hydroxyproline Assay Kit (MAK008, Millipore Sigma, Darmstadt, Germany). Following the vastus lateralis muscle biopsy, muscle samples were quickly flash

frozen in liquid nitrogen and stored at -80°C until analysis. The muscle was homogenized in double-distilled water (volume equal to 10x pellet weight: i.e. 100 µl double-distilled water for 10 mg pellet weight). When adequately homogenized, the sample was vortexed thoroughly and 12M HCl (volume equal to double-distilled water used for homogenization) was added to hydrolyze the sample overnight at 105°C. Following hydrolysis, the sample/hydrolysate was vortexed and 20 µl was loaded in duplicate to a 96-well plate with hydroxyproline standard (MAK008, Millipore Sigma). The plate was dried overnight at 60°C. Chloramine T/Oxidation Buffer included in the Hydroxyproline Assay Kit was added to each plate well and incubated at room temperature for 5 min. Next, diluted p-dimethylaminobenzaldehyde (DMAB) Reagent (MAK008, Millipore Sigma) was pipetted into each well followed by incubation for 90 min at 60°C. Absorbance was measured on a microplate reader at 595nm, and hydroxyproline content was calculated by a standard curve then normalized to the loaded sample volume (20 µl).

## **RNA-Sequencing**

### ***RNA isolation***

Muscle sample was homogenized in Tri-reagent using Zirconium Oxide beads (2.0 mm, RNase-free, Next Advance, Inc. Troy, NY) homogenization at 4°C. The homogenate was centrifuged at 15,000 g, 4°C for 15 min. The supernatant was used for muscle total RNA extraction using Direct-zol™ RNA MiniPrep Plus (Zymo Research, Irvine, CA) with DNase I treated on column (14).

### ***Sequencing, preprocessing and alignment***

Total RNA was sequenced on Illumina HiSeq 4000 system at Novogene Corporation, Chula Vista, CA, using a paired-end 150 bp dual-indexing protocol. Raw fastq reads were passed through quality control using FastQC (v0.11.4) and the results were compiled using MultiQC (v1.7) (130, 131). Reads that were detected for adapter contamination were subjected to adapter trimming, while low quality and too short reads were filtered using default parameters in fastp (v0.19.4)- an all-in-one Fastq preprocessing tool (132). The reads that passed quality control were aligned to GRCh38 primary build of the reference human genome with transcript annotations (gencode.v29.annotation.gtf) obtained from GENCODE, using the STAR aligner (v2.6.1b) (133, 134). The transcripts were quantified using RNA-Sequencing by Expectation Maximization- RSEM (v1.3.0) (135). The raw sequences and the quantified data are available in

the Gene Expression Omnibus (GEO) database under the accession code GSE157712 (publicly available 03/2021).

### ***Statistical Modeling, Differential Gene Expression and GSEA***

All statistical tests for RNA-Seq analysis were carried out using the R statistical software R 4.0.2.

The raw counts were filtered using a counts-per-million cutoff of 0.5 (10/minimum library size in millions), in at least 7 samples (number of samples in the smallest group of comparison). The raw counts were normalized using the trimmed mean of M-values (TMM) normalization in limma (v3.42.2). The voom function was applied to the normalized data to minimize heteroskedasticity and include precision weights for the mean-variance relationship for all genes (136). A principal component analysis was run to visually inspect any evident batch effects within the data, following which a linear model was fit on the voom-normalized data, while using sample ID as the blocking variable to account for subject-specific variability between the paired CKD and dialysis samples. Differential gene expression was calculated for the following contrasts using the empirical Bayes statistic in limma- 1) CKD patients vs healthy controls; 2) CKD patients pre vs post dialysis. The raw p-values were adjusted for multiple testing using the Benjamini-Hochberg correction and a threshold of q-value < 0.05 was used to categorize the genes as differentially expressed. Pathway overrepresentation within the differentially expressed genes was carried out using ConsensusPathdb (137). Gene Set Enrichment Analysis was carried out on the voom-normalized gene expression data using the CAMERA algorithm within limma (138). The Hallmark gene sets for humans curated by the Walter and Eliza Hall Institute were used for GSEA and downloaded from [http://bioinf.wehi.edu.au/software/MSigDB/human\\_H\\_v5p2.rdata](http://bioinf.wehi.edu.au/software/MSigDB/human_H_v5p2.rdata).

### **Statistics**

Histochemistry, immunohistochemistry and hydroxyproline data were compared between CKD patients and controls using two-tailed t-tests or Wilcoxon rank-sum tests. Spearman correlation coefficients and linear regression models were used to test associations of eGFR with muscle outcome measures. Analyses including data collected from ESRD patients receiving dialysis were performed using mixed effects models including random intercepts to account for repeated measures in the subset who had undergone serial biopsies before and after the initiation of dialysis or who had second biopsies while non-dialysis dependent. Subjects noted as CKD

Stage 4/5 in Figure 4 represent a subset of all CKD subjects, specifically those with an eGFR  $<30 \text{ mL/min/1.73m}^2$ . Satellite cell abundance, satellite cell-capillary distance, densely packed collagen content, and loosely packed collagen content were log-transformed to satisfy model assumptions. Multivariable linear regression and mixed effects models were adjusted for age, sex, race, and history of diabetes, hypertension, and cardiovascular disease unless otherwise noted. To calculate the CKD severity score, we computed the sum of standardized differences from the mean for serum bicarbonate, potassium, calcium, phosphate, parathyroid hormone, and hemoglobin. For serum bicarbonate, serum calcium, and hemoglobin, we input the negative of the standardized value into the summative score, as progression of non-dialysis dependent CKD induces a decrease in each parameter. All analyses were performed with Stata 13.1 (StataCorp, College Station, TX). A p-value  $<0.05$  was considered statistically significant.

### **Study Approval**

The study protocols were approved by the Institutional Review Board of the Albert Einstein College of Medicine. Before inclusion in the study, written informed consent was provided by all participants.
